# Supplementary material for: iLoc-Hum: using the accumulation-label scale to predict subcellular locations of human proteins with both single and multiple sites
Source: Royal Society of Chemistry journal article supplement (doi:10.1039/c1mb05420a), 2011-12-01
Supplement: c1mb05420a_2.pdf [file c1mb05420a_2.pdf]

**Online Supporting Information S2b.** A head-to-head comparison between the results predicted by **iLoc-Hum** and those by **MultiLoc2**, the updated version of **MultiLoc** (Hoglund et al., *Bioinformatics* 2006, 22, 1158-1165), on the 270 independent single-location proteins listed in the [Online Supporting Information S2a](#). For facilitating comparison, the corresponding experimental subcellular locations as annotated in Swiss-Prot databank (Release 2011\_06 of 31-May-11) are also given.

| Protein accession number | <b>iLoc-Hum</b>               | <b>MultiLoc2</b> | Experimental result annotated in Swiss-Prot database |
|--------------------------|-------------------------------|------------------|------------------------------------------------------|
| A5A3E0                   | Cytoplasmic                   | Cytoplasmic      | Cytoplasmic                                          |
| A6NGB9                   | Cytoplasmic                   | Cytoplasmic      | Cytoplasmic                                          |
| A8MTZ0                   | Cytoplasmic                   | Cytoplasmic      | Cytoplasmic                                          |
| O14827                   | Cytoplasmic                   | Cytoplasmic      | Cytoplasmic                                          |
| O95810                   | Cytoplasmic                   | Nuclear          | Cytoplasmic                                          |
| P14317                   | Cytoplasmic                   | Nuclear          | Cytoplasmic                                          |
| A8K8P3                   | Cytoplasmic                   | Cytoplasmic      | Cytoplasmic                                          |
| A8MTJ3                   | Cytoplasmic                   | Cytoplasmic      | Cytoplasmic                                          |
| A9UHW6                   | Cytoplasmic                   | Cytoplasmic      | Cytoplasmic                                          |
| O00159                   | Cytoplasmic;<br>Extracellular | Cytoplasmic      | Cytoplasmic                                          |
| O00167                   | Nuclear                       | Peroxisomal      | Cytoplasmic                                          |
| O00294                   | Cytoplasmic                   | Nuclear          | Cytoplasmic                                          |
| O14907                   | Nuclear                       | Cytoplasmic      | Cytoplasmic                                          |
| O14965                   | Cytoplasmic                   | Cytoplasmic      | Cytoplasmic                                          |
| O14974                   | Cytoplasmic                   | Nuclear          | Cytoplasmic                                          |
| O15061                   | Cytoplasmic                   | Cytoplasmic      | Cytoplasmic                                          |
| O15083                   | Cytoplasmic                   | Nuclear          | Cytoplasmic                                          |
| O15231                   | Nuclear                       | Cytoplasmic      | Cytoplasmic                                          |
| O15344                   | Cytoplasmic                   | Nuclear          | Cytoplasmic                                          |
| O43164                   | Synapse                       | Nuclear          | Cytoplasmic                                          |
| O60259                   | Extracellular                 | Extracellular    | Cytoplasmic                                          |
| O60759                   | Cytoplasmic                   | Peroxisomal      | Cytoplasmic                                          |
| O75190                   | Cytoplasmic                   | Nuclear          | Cytoplasmic                                          |
| O94811                   | Cytoplasmic                   | Nuclear          | Cytoplasmic                                          |
| O94927                   | Centriole                     | Cytoplasmic      | Cytoplasmic                                          |
| P14136                   | Cytoplasmic                   | Mitochondrion    | Cytoplasmic                                          |
| P35573                   | Lysosomal                     | Cytoplasmic      | Cytoplasmic                                          |

|        |                            |                       |                       |
|--------|----------------------------|-----------------------|-----------------------|
| P53370 | Cytoplasmic                | Mitochondrion         | Cytoplasmic           |
| P78362 | Cytoplasmic                | Nuclear               | Cytoplasmic           |
| Q01484 | Cytoplasmic                | Nuclear               | Cytoplasmic           |
| O43567 | Cytoplasmic; Nuclear       | Golgi apparatus       | Endoplasmic reticulum |
| P07237 | Endoplasmic reticulum      | Endoplasmic reticulum | Endoplasmic reticulum |
| O75900 | Cytoplasmic; Extracellular | Golgi apparatus       | Endoplasmic reticulum |
| O55232 | Nucleus;                   | Extracellular         | Endoplasmic reticulum |
| O77588 | Endoplasmic reticulum      | Endoplasmic reticulum | Endoplasmic reticulum |
| O60568 | Endoplasmic reticulum      | Endoplasmic reticulum | Endoplasmic reticulum |
| O08601 | Endoplasmic reticulum      | Endoplasmic reticulum | Endoplasmic reticulum |
| O94491 | Endoplasmic reticulum      | Cytoplasmic           | Endoplasmic reticulum |
| O59833 | Endoplasmic reticulum      | Cytoplasmic           | Endoplasmic reticulum |
| O42707 | Endoplasmic reticulum      | Golgi apparatus       | Endoplasmic reticulum |
| O94401 | Endoplasmic reticulum      | Golgi apparatus       | Endoplasmic reticulum |
| P12337 | Endoplasmic reticulum      | Peroxisomal           | Endoplasmic reticulum |
| Q29550 | Endoplasmic reticulum      | Cytoplasmic           | Endoplasmic reticulum |
| Q9D1Q6 | Endoplasmic reticulum      | Endoplasmic reticulum | Endoplasmic reticulum |
| O35949 | Endoplasmic reticulum      | Golgi apparatus       | Endoplasmic reticulum |
| P16232 | Endoplasmic reticulum      | Peroxisomal           | Endoplasmic reticulum |
| Q6QLL4 | Endoplasmic reticulum      | Peroxisomal           | Endoplasmic reticulum |
| P13516 | Endoplasmic reticulum      | Peroxisomal           | Endoplasmic reticulum |
| Q9TT94 | Endoplasmic reticulum      | Peroxisomal           | Endoplasmic reticulum |
| Q6P7B9 | Endoplasmic reticulum      | Peroxisomal           | Endoplasmic reticulum |
| P13011 | Endoplasmic                | Peroxisomal           | Endoplasmic reticulum |

|        |                       |                       |                       |
|--------|-----------------------|-----------------------|-----------------------|
|        | reticulum             |                       |                       |
| P07308 | Endoplasmic reticulum | Cytoplasmic           | Endoplasmic reticulum |
| Q6AYY8 | Endoplasmic reticulum | Peroxisomal           | Endoplasmic reticulum |
| P19324 | Endoplasmic reticulum | Extracellular         | Endoplasmic reticulum |
| P12244 | Endoplasmic reticulum | Endoplasmic reticulum | Endoplasmic reticulum |
| O54998 | Endoplasmic reticulum | Endoplasmic reticulum | Endoplasmic reticulum |
| Q64573 | Endoplasmic reticulum | Endoplasmic reticulum | Endoplasmic reticulum |
| Q64176 | Endoplasmic reticulum | Endoplasmic reticulum | Endoplasmic reticulum |
| Q99KV1 | Endoplasmic reticulum | Endoplasmic reticulum | Endoplasmic reticulum |
| P81999 | Endoplasmic reticulum | Endoplasmic reticulum | Endoplasmic reticulum |
| O04012 | Extracellular         | Extracellular         | Extracellular         |
| O04011 | Extracellular         | Extracellular         | Extracellular         |
| A2ASQ1 | Cytoplasmic           | Plasma membrane       | Extracellular         |
| A2SW69 | Golgi apparatus       | Cytoplasmic           | Extracellular         |
| O42720 | Extracellular         | Extracellular         | Extracellular         |
| O54858 | Nucleus               | Extracellular         | Extracellular         |
| O43405 | Extracellular         | Endoplasmic reticulum | Extracellular         |
| O42182 | Extracellular         | Extracellular         | Extracellular         |
| O35568 | Extracellular         | Extracellular         | Extracellular         |
| O46378 | Extracellular         | Cytoplasmic           | Extracellular         |
| A2AJ76 | Cytoplasmic           | Plasma membrane       | Extracellular         |
| O42235 | Extracellular         | Endoplasmic reticulum | Extracellular         |
| O08677 | Extracellular         | Extracellular         | Extracellular         |
| O15230 | Extracellular         | Extracellular         | Extracellular         |
| A4D0S4 | Extracellular         | Extracellular         | Extracellular         |
| O18767 | Extracellular         | Plasma membrane       | Extracellular         |
| C7G0B5 | Cytoplasmic           | Extracellular         | Extracellular         |
| O09164 | Extracellular         | Endoplasmic reticulum | Extracellular         |

|        |                               |                          |                 |
|--------|-------------------------------|--------------------------|-----------------|
| A1EC31 | Cytoplasmic                   | Extracellular            | Extracellular   |
| O41800 | Nucleus                       | Cytoplasmic              | Extracellular   |
| O00744 | Extracellular                 | Extracellular            | Extracellular   |
| O13267 | Extracellular                 | Extracellular            | Extracellular   |
| O42122 | Extracellular                 | Extracellular            | Extracellular   |
| O15978 | Extracellular                 | Extracellular            | Extracellular   |
| O00755 | Extracellular                 | Extracellular            | Extracellular   |
| O42280 | Extracellular                 | Extracellular            | Extracellular   |
| O14904 | Extracellular                 | Extracellular            | Extracellular   |
| O14905 | Extracellular                 | Extracellular            | Extracellular   |
| O35468 | Extracellular                 | Extracellular            | Extracellular   |
| O54767 | Extracellular                 | Plasma membrane          | Extracellular   |
| P61106 | Golgi apparatus               | Cytoplasmic              | Golgi apparatus |
| P61204 | Golgi apparatus;<br>Lysosomal | Cytoplasmic              | Golgi apparatus |
| P62330 | Golgi apparatus;<br>Lysosomal | Cytoplasmic              | Golgi apparatus |
| P84077 | Golgi apparatus;<br>Lysosomal | Cytoplasmic              | Golgi apparatus |
| P84085 | Golgi apparatus;<br>Lysosomal | Mitochondrion            | Golgi apparatus |
| A1X149 | Cytoplasmic                   | Cytoplasmic              | Golgi apparatus |
| A7ERK2 | Plasma membrane               | Cytoplasmic              | Golgi apparatus |
| A7THG4 | Plasma membrane               | Cytoplasmic              | Golgi apparatus |
| A6ZS37 | Golgi apparatus               | Cytoplasmic              | Golgi apparatus |
| A2VDR8 | Golgi apparatus               | Cytoplasmic              | Golgi apparatus |
| A2YHR9 | Golgi apparatus               | Mitochondrion            | Golgi apparatus |
| A2ZAK8 | Golgi apparatus               | Cytoplasmic              | Golgi apparatus |
| A2YU42 | Golgi apparatus               | Cytoplasmic              | Golgi apparatus |
| A2YCI3 | Golgi apparatus               | Cytoplasmic              | Golgi apparatus |
| A1IGX5 | Golgi apparatus               | Endoplasmic<br>reticulum | Golgi apparatus |
| A7S1L6 | Plasma membrane               | Peroxisomal              | Golgi apparatus |
| A1YGR5 | Cytoplasmic                   | Golgi apparatus          | Golgi apparatus |
| B0F9L4 | Golgi apparatus               | Cytoplasmic              | Golgi apparatus |
| A8XP14 | Golgi apparatus               | Peroxisomal              | Golgi apparatus |
| A6ZZS6 | Golgi apparatus               | Golgi apparatus          | Golgi apparatus |

|        |                 |                       |                 |
|--------|-----------------|-----------------------|-----------------|
| A5PJ65 | Golgi apparatus | Golgi apparatus       | Golgi apparatus |
| A0AAS4 | Golgi apparatus | Cytoplasmic           | Golgi apparatus |
| A7S6Y0 | Plasma membrane | Endoplasmic reticulum | Golgi apparatus |
| A4K2N5 | Golgi apparatus | Extracellular         | Golgi apparatus |
| A4K2W1 | Golgi apparatus | Extracellular         | Golgi apparatus |
| A7EMV1 | Plasma membrane | Endoplasmic reticulum | Golgi apparatus |
| A7TGB4 | Plasma membrane | Golgi apparatus       | Golgi apparatus |
| A7EFY0 | Plasma membrane | Peroxisomal           | Golgi apparatus |
| A7TMU9 | Plasma membrane | Peroxisomal           | Golgi apparatus |
| A1C8D8 | Cytoplasmic     | Golgi apparatus       | Golgi apparatus |
| Q64191 | Lysosomal       | Lysosomal             | Lysosomal       |
| O02467 | Lysosomal       | Cytoplasmic           | Lysosomal       |
| P00795 | Lysosomal       | Cytoplasmic           | Lysosomal       |
| P09648 | Lysosomal       | Cytoplasmic           | Lysosomal       |
| P25773 | Lysosomal       | Cytoplasmic           | Lysosomal       |
| Q26534 | Lysosomal       | Cytoplasmic           | Lysosomal       |
| A7MB63 | Lysosomal       | Extracellular         | Lysosomal       |
| O60931 | Lysosomal       | Extracellular         | Lysosomal       |
| P54639 | Lysosomal       | Extracellular         | Lysosomal       |
| P54640 | Nucleus         | Lysosomal             | Lysosomal       |
| P06340 | Plasma membrane | Lysosomal             | Lysosomal       |
| Q5R8E3 | Lysosomal       | Lysosomal             | Lysosomal       |
| Q13571 | Lysosomal       | Endoplasmic reticulum | Lysosomal       |
| B5X7X4 | Lysosomal       | Mitochondrion         | Lysosomal       |
| B5FY55 | Lysosomal       | Mitochondrion         | Lysosomal       |
| Q63ZJ2 | Lysosomal       | Mitochondrion         | Lysosomal       |
| Q60HE8 | Lysosomal       | Plasma membrane       | Lysosomal       |
| A8WH34 | Plasma membrane | Lysosomal             | Lysosomal       |
| C0HBB2 | Plasma membrane | Lysosomal             | Lysosomal       |
| A6BMK7 | Lysosomal       | Plasma membrane       | Lysosomal       |
| O35657 | Lysosomal       | Mitochondrion         | Lysosomal       |
| Q0P5F0 | Lysosomal       | Mitochondrion         | Lysosomal       |
| Q5NVF6 | Lysosomal       | Lysosomal             | Lysosomal       |

|        |                              |                 |               |
|--------|------------------------------|-----------------|---------------|
| P26779 | Lysosomal                    | Extracellular   | Lysosomal     |
| P07602 | Lysosomal                    | Extracellular   | Lysosomal     |
| D3ZEH5 | Plasma membrane              | Lysosomal       | Lysosomal     |
| Q66I51 | Lysosomal                    | Cytoplasmic     | Lysosomal     |
| Q5PPM8 | Lysosomal                    | Cytoplasmic     | Lysosomal     |
| Q5XKA6 | Lysosomal                    | Cytoplasmic     | Lysosomal     |
| Q60V75 | Lysosomal                    | Cytoplasmic     | Lysosomal     |
| O14925 | Mitochondrion                | Cytoplasmic     | Mitochondrion |
| O43772 | Mitochondrion                | Peroxisomal     | Mitochondrion |
| O75324 | Mitochondrion                | Golgi apparatus | Mitochondrion |
| P00156 | Mitochondrion                | Plasma membrane | Mitochondrion |
| P00414 | Mitochondrion                | Extracellular   | Mitochondrion |
| P03886 | Mitochondrion                | Extracellular   | Mitochondrion |
| P03915 | Mitochondrion                | Extracellular   | Mitochondrion |
| P05141 | Mitochondrion                | Cytoplasmic     | Mitochondrion |
| P17152 | Mitochondrion                | Mitochondrion   | Mitochondrion |
| P19099 | Mitochondrion                | Mitochondrion   | Mitochondrion |
| P23368 | Mitochondrion                | Mitochondrion   | Mitochondrion |
| P25874 | Mitochondrion                | Peroxisomal     | Mitochondrion |
| P27144 | Mitochondrion                | Mitochondrion   | Mitochondrion |
| P27338 | Mitochondrion                | Peroxisomal     | Mitochondrion |
| P36404 | Mitochondrion                | Cytoplasmic     | Mitochondrion |
| P40305 | Mitochondrion                | Extracellular   | Mitochondrion |
| P49448 | Mitochondrion                | Mitochondrion   | Mitochondrion |
| P49675 | Mitochondrion                | Mitochondrion   | Mitochondrion |
| P50336 | Mitochondrion                | Mitochondrion   | Mitochondrion |
| O94826 | Mitochondrion                | Plasma membrane | Mitochondrion |
| O95674 | Mitochondrion                | Plasma membrane | Mitochondrion |
| P00973 | Mitochondrion                | Cytoplasmic     | Mitochondrion |
| P0C869 | Mitochondrion                | Cytoplasmic     | Mitochondrion |
| P22557 | Mitochondrion                | Peroxisomal     | Mitochondrion |
| P29803 | Mitochondrion                | Mitochondrion   | Mitochondrion |
| P49419 | Mitochondrion                | Mitochondrion   | Mitochondrion |
| Q5HZI1 | Plasma membrane              | Cytoplasmic     | Mitochondrion |
| P12617 | Mitochondrion;<br>Cytoplasm; | Peroxisomal     | Mitochondrion |

|        | Peroxisomal<br>Mitochondrion;<br>Cytoplasm;<br>Peroxisomal | Peroxisomal   | Mitochondrion |
|--------|------------------------------------------------------------|---------------|---------------|
| O95822 |                                                            |               |               |
| P99029 | Peroxisomal                                                | Mitochondrion | Mitochondrion |
| A6NDE4 | Cytoplasmic                                                | Nuclear       | Nuclear       |
| A6NEQ0 | Cytoplasmic                                                | Nuclear       | Nuclear       |
| A6NHQ2 | Nuclear                                                    | Nuclear       | Nuclear       |
| O00268 | Nuclear                                                    | Nuclear       | Nuclear       |
| O00321 | Nuclear                                                    | Nuclear       | Nuclear       |
| O00716 | Nuclear                                                    | Nuclear       | Nuclear       |
| O14802 | Nuclear                                                    | Nuclear       | Nuclear       |
| O14901 | Nuclear                                                    | Cytoplasmic   | Nuclear       |
| O14981 | Nuclear                                                    | Nuclear       | Nuclear       |
| O43293 | Cytoplasmic                                                | Cytoplasmic   | Nuclear       |
| O43683 | Nuclear                                                    | Cytoplasmic   | Nuclear       |
| O43805 | Nuclear; Centriole                                         | Cytoplasmic   | Nuclear       |
| O75386 | Plasma membrane                                            | Nuclear       | Nuclear       |
| P39019 | Mitochondrion                                              | Cytoplasmic   | Nuclear       |
| A4D1E9 | Nuclear                                                    | Cytoplasmic   | Nuclear       |
| O00712 | Nuclear                                                    | Nuclear       | Nuclear       |
| O15016 | Nuclear                                                    | Nuclear       | Nuclear       |
| O15047 | Nuclear                                                    | Nuclear       | Nuclear       |
| O15084 | Nuclear                                                    | Cytoplasmic   | Nuclear       |
| O15151 | Nuclear                                                    | Nuclear       | Nuclear       |
| O15265 | Nuclear                                                    | Cytoplasmic   | Nuclear       |
| O43294 | Cytoskeleton                                               | Cytoplasmic   | Nuclear       |
| O43482 | Nuclear                                                    | Mitochondrion | Nuclear       |
| O60306 | Nuclear                                                    | Cytoplasmic   | Nuclear       |
| O60729 | Nuclear; Endoplasmic<br>reticulum                          | Mitochondrion | Nuclear       |
| O75530 | Nuclear                                                    | Cytoplasmic   | Nuclear       |
| P61088 | Cytoplasmic                                                | Peroxisomal   | Nuclear       |
| P68036 | Cytoplasmic                                                | Peroxisomal   | Nuclear       |
| Q00688 | Nuclear                                                    | Cytoplasmic   | Nuclear       |
| Q01196 | Nuclear                                                    | Mitochondrion | Nuclear       |

---

|        |               |                 |             |
|--------|---------------|-----------------|-------------|
| B3DMA2 | Peroxisomal   | Peroxisomal     | Peroxisomal |
| P07872 | Peroxisomal   | Peroxisomal     | Peroxisomal |
| O74934 | Peroxisomal   | Peroxisomal     | Peroxisomal |
| O64894 | Peroxisomal   | Peroxisomal     | Peroxisomal |
| O74935 | Peroxisomal   | Peroxisomal     | Peroxisomal |
| O74936 | Peroxisomal   | Peroxisomal     | Peroxisomal |
| O00116 | Peroxisomal   | Peroxisomal     | Peroxisomal |
| O64883 | Lysosomal     | Mitochondrion   | Peroxisomal |
| P17598 | Peroxisomal   | Cytoplasmic     | Peroxisomal |
| P18122 | Peroxisomal   | Cytoplasmic     | Peroxisomal |
| P25819 | Peroxisomal   | Cytoplasmic     | Peroxisomal |
| P30567 | Peroxisomal   | Cytoplasmic     | Peroxisomal |
| P25890 | Peroxisomal   | Cytoplasmic     | Peroxisomal |
| O49506 | Peroxisomal   | Peroxisomal     | Peroxisomal |
| O35586 | Cytoplasmic   | Peroxisomal     | Peroxisomal |
| O35760 | Cytoplasmic   | Peroxisomal     | Peroxisomal |
| P00371 | Peroxisomal   | Peroxisomal     | Peroxisomal |
| O18778 | Peroxisomal   | Mitochondrion   | Peroxisomal |
| O14832 | Peroxisomal   | Mitochondrion   | Peroxisomal |
| O35386 | Peroxisomal   | Mitochondrion   | Peroxisomal |
| O60065 | Peroxisomal   | Peroxisomal     | Peroxisomal |
| O94516 | Peroxisomal   | Cytoplasmic     | Peroxisomal |
| O59807 | Peroxisomal   | Golgi apparatus | Peroxisomal |
| O70579 | Mitochondrion | Peroxisomal     | Peroxisomal |
| O75192 | Peroxisomal   | Peroxisomal     | Peroxisomal |
| O70597 | Peroxisomal   | Peroxisomal     | Peroxisomal |
| O96011 | Peroxisomal   | Peroxisomal     | Peroxisomal |
| O80845 | Peroxisomal   | Peroxisomal     | Peroxisomal |
| P09110 | Peroxisomal   | Mitochondrion   | Peroxisomal |
| P09118 | Peroxisomal   | Peroxisomal     | Peroxisomal |

---

|        |                 |                 |                 |
|--------|-----------------|-----------------|-----------------|
| A3KFT3 | Plasma membrane | Plasma membrane | Plasma membrane |
| A4D2G3 | Plasma membrane | Plasma membrane | Plasma membrane |
| A6NCV1 | Plasma membrane | Plasma membrane | Plasma membrane |
| A6ND48 | Plasma membrane | Plasma membrane | Plasma membrane |
| A6NDH6 | Plasma membrane | Plasma membrane | Plasma membrane |



|        |                 |                       |                 |
|--------|-----------------|-----------------------|-----------------|
| A6NET4 | Plasma membrane | Plasma membrane       | Plasma membrane |
| A6NF89 | Plasma membrane | Plasma membrane       | Plasma membrane |
| A6NFC9 | Plasma membrane | Plasma membrane       | Plasma membrane |
| A6NGY5 | Plasma membrane | Plasma membrane       | Plasma membrane |
| A6NGZ8 | Plasma membrane | Extracellular         | Plasma membrane |
| A6NH00 | Plasma membrane | Plasma membrane       | Plasma membrane |
| A6NHA9 | Plasma membrane | Plasma membrane       | Plasma membrane |
| A6NHG9 | Plasma membrane | Plasma membrane       | Plasma membrane |
| A6NIJ9 | Plasma membrane | Plasma membrane       | Plasma membrane |
| A6NJW9 | Plasma membrane | Endoplasmic reticulum | Plasma membrane |
| A6NLE4 | Plasma membrane | Peroxisomal           | Plasma membrane |
| B2RN74 | Plasma membrane | Plasma membrane       | Plasma membrane |
| B7U540 | Plasma membrane | Peroxisomal           | Plasma membrane |
| O00212 | Plasma membrane | Cytoplasmic           | Plasma membrane |
| O00501 | Plasma membrane | Extracellular         | Plasma membrane |
| O00526 | Plasma membrane | Endoplasmic reticulum | Plasma membrane |
| O14610 | Plasma membrane | Cytoplasmic           | Plasma membrane |
| O14807 | Plasma membrane | Cytoplasmic           | Plasma membrane |
| O14910 | Plasma membrane | Cytoplasmic           | Plasma membrane |
| A0FGR8 | Plasma membrane | Mitochondrion         | Plasma membrane |
| A0FGR9 | Plasma membrane | Endoplasmic reticulum | Plasma membrane |
| A4D1S5 | Plasma membrane | Cytoplasmic           | Plasma membrane |
| A6NDL8 | Plasma membrane | Plasma membrane       | Plasma membrane |
| O00451 | Plasma membrane | Extracellular         | Plasma membrane |
| O14494 | Plasma membrane | Endoplasmic reticulum | Plasma membrane |

---
