# Supplementary material for: iLoc-Hum: using the accumulation-label scale to predict subcellular locations of human proteins with both single and multiple sites
Source: Royal Society of Chemistry journal article supplement (doi:10.1039/c1mb05420a), 2011-12-01
Supplement: c1mb05420a_3.pdf [file c1mb05420a_3.pdf]

**Online Supporting Information S2c.** Dataset used to demonstrate the power of **iLoc-Hum** in identifying proteins for their multiple locations. The dataset contains 30 independent multiple-location proteins randomly picked from Swiss-Prot database (Release 2011\_06 of 31-May-11) that are distributed within the scope of the nine subcellular locations of [Online Supporting Information S2a](#), but none of them occurs in the training dataset of **iLoc-Hum**.

---

>A0FI79

MPSKAENLRPSEPAPQPPEGRTLQGQLPGAPLAQRAGSPDPVPGSESPALACSTPATPSG  
EDPPARAAPIAPRPPARPRLERALSLEDDKGWRRRRFRGSQEDLEARNGTSPSRGSVQSEG  
PGAPAHSCSPCLSTSLQEIPKSRGVLSSERGSPPSSGGNPLSGVASSSPNLPHRDAAVAG  
SSPRLPSSLPPRPPPALSLESLRTANKVDSLDLADYKLRAQPLLVRHSSSLGPGRPR  
SPLACDDCSLRSKSSSFLAPIRSKDVRSSYLEGSLLASGALLGADELARYFPDRNVA  
LFVATWNMQGQKELPPSLDEFLLPAEADYAQDLYVIGVQEGCSDRREWETRLQETLGPY  
VLLSSAAHGVLYMSLFIRRDLIWFCSEVECSTVTTTRIVSQIKTKGALGISFTFFGTSEFLF  
ITSHFTSGDGKVAERLLDYTRTVQALALPRNVPDTPYRSSAADVTTRFDEVFWFGDFNF  
RLSGGRTVVDALLCQGLVVDVPALLQHDQLIREMRKGSIFKGFQEPDIHFLPSYKFDIGK  
DTYDSTSKQRTPSYTDRLVLYRSRHKGDICPVSYSSCPGIKTSDHRPVYGLFRVKVRPGRD  
NIPLAAGKFDRELYLLGIKRRISKEIQRQQALQSQNSSTICSVS

>A0JPI4

MTTLIRRRRAEEGQERRADSEDSIKDKDEEDSADSKEIRLTLMEEVLLLGLKDKEGYTS  
FWNDCISSGLRGGILIELFLRGRVLEPATIRKKRLTDKKVLLKSDKLTGDVLLDETIKH  
MKATEPAETVQSWIELLTGETWNPFLQYQLRNVRERIAKNLVEKGILTTEKQNFLLFDM  
TTHPVTNTTEKQRLVKKLQESLLEKWNVDPHRMDKRTLALLVLAHSSDVLENAFSSLSDE  
KYDMAMIRSKELLDLEPDTEGTPNACEMIWAVLSAFNKS

>A1CJW1

MAGRHSQEKSYAEAAAAPAPEKPDSSDVTPAVPADVYKLLGFTAAMIVGPIGMYFVTVD  
FGASSTVAGVTAAVTANVILFTYIYVAWLEDKEDREVAACKRKEKKAQ

>A1D7K7

MTSRRSQEKSYAEAAAAPPKAASSDVTPAVPADVYKLLGFTAAMVVGPIGMYFITVN  
SGASSTVAGITAAITANLVLFYIYVAWLDDREEREAAASKKKEKKAQ

>A5JYQ9

MTTSSSSEPSTMATLFPNFRDQEVQSAVKNLLTYSLVILIVPLASMFLKQFFFEGLLG  
SANDALTYSAIIAVVLVHVVLGIWLFATKQEDRKKRENKQD

>A6H7F6

MTTLTHRARRTEVGKNSEKKVESEENVNQRNQNEDIGDSKDIRLTLMEEVLLLGLKDK  
EGYTSFWNDCISSGLRGGILIELAMRGRIYLEPPTMRKKRLDRKVLLKSDSPTGDVLLD  
ETLKHKATEPTETVQTWIELLTGETWNPFLQYQLRNVRERIAKNLVEKGILTTEKQNF  
LLFDMTTHPVTNTTEKQRLVKKLQDSVLERWVNDPQRMDKRTLALLVLAHSSDVLENVFS  
SLTDDKYDMAMNRAKDLVELDPEVEGTHSATEMIWAVLAAFNKS

>A7YY49

MGQNDLMGTAEDFADQFLRVTKQYLPHVARLCLISTFLEDGIRMWFQWSEQRDYIDTTWN  
CGYLLASSFVFLNLLGQLTGCILVLSRNFVQYACFGLFGIIALQTIAYSILWDLKFLMRN  
LALGGGLLLLLLAESRSEKSMFAGVPTMRESSPKQYMQLGGRVLLVLMFMTLLHFDASFF

SILQNI VGTALMILVAIGFKTKLAALTLVVWLFAINVYFNAFWTIPVYKPMHDFLKYDFE  
QTMSVIGGLLLVVALGPGGVSMDEKKKEW

>O00628

MSAVCGGAARMLRTPGRHGYAAEFSPYLPGRACATAQHYGIAGCGTLLIILDPDEAGLRL  
FRSFDWNDGLFDVTWSENNEHVLIITCSGDGSLQLWDTAKAAGPLQVYKEHAQEYVSVDWS  
QTRGEQLVVSWSWDQTVKLWDPTVVKSLCTFRGHESIISTIWSPHIPGCFASASGDQTL  
RIWDVKAAGVRIVIPAHQAEILSCDWCKYNENLLVTGAVDCSLRGWDLRNVRQPVFELLG  
HTYAIRRVKFSPFHASVLAASCSYDFTVRFWNFSKPDSLLETVEHHTTEFTCGLDFSLQSPT  
QVADCSWDETIKIYDPACLTIPA

>O08547

MVLLTMIARVADGLPLAASMQEDEQSGRDLQQYQSQAQQLFRKLNEQSPTRCTLEAGAMT  
FHYIIIEQGVCYLVLCEAAFPKKLAFAYLEDLHSEFDEQHGGKVPTVSRPYSFIEFDTFIQ  
KTKKLYIDSRARRNLGSINTELQDVQRIMVANIEEVLQRGEALSALDSKANNLSSLSKKY  
RQDAKYLNMRSTYAKLAAVAVFFIMLIVYVRFWWL

>O08595

MVLLTMIARVADGLPLAASMQEDEQSGRDLQQYQSQAQQLFRKLNEQSPTRCTLGAGAMT  
FHYIIIEQGVCYLVLCEAAFPKKLAFAYLEDLHSEFDEQHGGKVPTVSRPYSFIEFDTFIQ  
KTKKLYIDSRARRNLGSINTELQDVQRIMVANIEEVLQRGEALSALDSKANNLSSLSKKY  
RQDAKYLNMRSTYAKLAAVAVFFIMLIVYVRFWWL

>O09174

MVLRGVRVVELAGLAPGPF CGMVLADFGAEVVRVNR LGSTGENFLARGKRSLALDLKRSQ  
GVTVLRMRCARADV LLEPFRCGVMEK LQLGPETLLQDNPKLIYARLSGFGQSGIFSKVAG  
HDINYLALSGVLSKIGRSGENPYPLNLLADFGGGLMCTLGIVLALFERTRSGRQIID  
SSMVEGTAYLSSFLWKTQPMGLWKQPRGQNILDGGAPFYTTYKTADGEFMAVGAIEPQFY  
ALLLKGLGLESEELPSQMSADWPEMKKKFADVFAKKTAEWCQIFDGTDACVTPVLTFFE  
EALHHQHNRERASFITDGEQLPSRPAPLLSRTPAVPSAKRDP SVGEHTVEVLREYGF SQ  
EEILQLHSDRIVESDKLKANL

>O13637

MRLKDISKTATLAWSPRGVNDNQALLALGGYTGTEGSKNSDTLLELWNNENPESQKPVGSI  
DVKTRFYDLAWEKSLDKPMGVIAGSLEDGGIGFWDPAAILKSDEASASIATYKSENGSIL  
GPLDFNRLQPNLLASGDNKGDVVWWDIKHPQQPFALPKQNRSEVHVVS WNNKVSHILAS  
GNATEYTTVWDVKLRQVLNLSYLGAAGVSAATGAVNSIAWHPNNATRLATAIDDNRNPI  
ILTWDLRQPTVPQNILTGHQKAALSLSWCPEDPTFLLSSGKDGRAMVWNVETGESLGSFP  
RSGNWTYKSSWCPNSNRVAVASLEGKVSIFSIQSTNTDKSQEASIKGATSIDDNEFFNN  
LPSIAGSQEPSFSLPLAPKWFKVPV GARFGFPNKIVSFS P NSKEVTIT SAPDEVEQDEAK  
SFHSSAKFQTEKEITDFCQKGV EESASEEEA INWKLLMAVSKRASRSKFAELLGYKTLKP  
KNDEDDSKVDESVAKDSTTPNELSKNANNENYDDSSFYGKLAESVQEVS IADKKDAEIV  
KDSFKIFNPEDSDLEKNITEALLTG DVLSAVKACLEEKKISEALFLSTFGGKECRKCVRD  
AFYELQEHKPSYMRLSACIADNDLQNVVDNAEVSEWKDIFVFICTYATDDEFAPLCSTLG  
QRLEDLEDEKSI R SAEFCYIASKSLQSYANLWLKQLATSTKTSKAASAYGAYVEQLTKLM  
DKVSMFRSIVVYKDDELSATKDWKLAGLYEVYIAYAKILSASGKFDDAMSYLNLVPTTEFP  
GAKEEIQRLTMLLEPHAVPPIHQIKQTGYAPVQPKTSQASSILPTVPRTTSYTSPYATTS  
SHITPADVHPLPPPSTSTTAGWNDAPMLGQLPMRRAAPSMAPVRSPPFGASSAQPAAMSR  
TSSVSTLPPPPPTASMTASAPAIASPPPPKVGETYHPPTASGTRVPPVQQPSHPNPYTPV

APQSPVAAASRISSSPNMPPSNPYTPPIAVASSTVNPAAHTYKPHGGSQIVPPPKQPANRVV  
PLPPTASQRASAYEPPTVSVSPSALSPSVTPQLPPVSSRLPPVSATRQIQQPPPVSTA  
LPSSSAVSRPPIATSAGRSSTAASTSAPLTYPAGDRSHIPGNLRPIYEMLNLAELQRVSQS  
LPPQMSRVVHDTEKRLNMLFDRLNSNVLSKPLTDELLALATSLNAHDYQTASNIQTNIVT  
TLGDQCEHWIVGVTRLITLSKSTT

>O13825

MFGFGNILYVTLNLLNAVAIILSEDRFLGRIGWSQSAALGFGDRQDTIKSRILHLIRAIRT  
VMTFPLIAINTIVIVYNLVLG

>O13932

MGSRFGRRKERNGDMLPLYESQSPQHLDSELENENDERISKLTGKVKSLKELTMNIGTEIT  
SSTKLMESMNSDFDSTKSLSGTMTRLKNVSKNGGISIWMWLAFFCLVALILVLVRF

>O13946

MMVSLKSSLFFMLALLTVVHALNFDIPAKTNPEPFCLREYVGEKNLVIVNLKTTGNMGDG  
QTLSSMITDSSGNTHSSIQNVLGEKSVAFDVDASAMLDICFLNLTLPGAIESEHKRSVK  
LEFTVGADADDYSSLQANNLEPVEADIRRARDFIEEIKGKIYYLQAREARFRNTNESTN  
ERVKNFAYLTFISLFLVIWQILYLRSSFQRKHLIP

>O14001

MTKLWVNFSSQKLLRLLIPSIIVVFafaALFAIYSPIQLGGINFYKRTNLTVEELGEKE  
LELSKTVTIDIYRKAMCMDDLEQSRKCTTFGLDPPISAHLFYTYNRDTGMNRVARQWNRR  
IPRVFHTIKGSNFIELSQFTAFAVELRVSHPNWAFVSWSHDDLNELVDKSYHNLHNAWSQ  
LSREAKDQWGFLLGLYEYGGVWMSRSLQLKKNIDKFVYAAELSVKQFTENITSSTVEEFQ  
PIFMAPKSLQYDFMIATPKHPFVLSLINELCKSEVLLKILSKRPYHGLDAAEALFAENRE  
SITIREQEFFFVNTYIDDGKVFVKNNPHIIFIPTEAFASTWDFLPSEESSEMCFADSPFLD  
PDYCISSHSSKPDGNELAIYWSNSFDLITA

>O14159

MDFGLTNNSIKAFEDQKLLHIHQSCVSYPSDTLICSI PVS AKNVDLNI PFKNILWVDKTG  
PNSVTLSYVSRSSKVATKCWVDFVENS DQFCEYLLDVAYKGIKRSRRFIVFINPHGGK GK  
AKHIWESEAE PVFSSAHSICEVVLTRRKDHAKSI AKNLDVGSYD GILSVGGDGLFHEVIN  
GLGERDDYLEAFKLPVCMIPGGSGNAFSYNATGQLKPALTALEILKGRPTSFDLMTFEQK  
GKKAYSFLTANYGIIADCDIGTENWRFMGENRAYLGFFLRFLQKPDWKCSIEMDVVSSDR  
TEIKHMYEKSKNLAPMSESSDSDKTVSTSPESHLLTFEINDLSIFCAGLLPYIAPDAKMF  
PAASNDDGLIDVVIVYSKQFRKSLLSMFTQLDNGGFYYSKHLNYYKVR SFRFTPVNTGKR  
HYFALDGESYPLEPFECRVAPKLGTTLSPVAGFQLLDI

>O14324

MKLGIFGLLLFTFFFQSQAVHFYFDGSKPKCFLKDMPKGMMVTGIVKAEQWNNNEANKWVT  
SNNIKIRVQVDETFANNHLIYKNDLRSNEAVRFTTTNEGTHRICYLSTSDGAWFSSTKTR  
LHVDLASDDKYNLIASSEDEAKDLTDRVAALNTRLESILGEQMLQRSREMTFRDTSESAN  
SRVVRWTIVQIVVLLVTICIWQLSHLQRFVKEKLV

>O15027

MPGLDRPLSRQNP HDGVVTPAASPSLPQPGLQMPGQWGPVQGGPQPSGQHRSPCPEGVPV  
SGVPCATSVPHFPTPSILHQPGHEQHSPLVAPPAALPSDGRDEVSHLQSGSHLANNSDP  
ESTFRQNPRIVNHWASPELRQNP GVKNEHRPASALVNPLARGDSPENRTHHPLGAGAGSG  
CAPLEADSGASGALAMFFQGGETENEENLSSEKAGLSGQADDFDCSSPGLGRPPAPTHV  
GAGSLCQALLPGPSNEAAGDVWGD TASTGVPDASGSQYENVENLEFVQNQEVL PSEPLNL

DPSSPSDQFRYGPLPGPAVPRHGAVCHTGAPDATLHTVHPDSVSSSYSSRSHGRLSGSAR  
PQELVGTFIQQEVGKPEDEASGSFFKQIDSSPVGGETDETTVSQNYRGSVVSQPSTPSPPK  
PTGIFQTSANSSFEVVKSHLVGVKPFADRVVVEVRETCVRQKQCRPAAALPDASPGN  
LEQPDPNMETLCAPQVCPLPLNSTTEAVHMLPHAGAPPLDTPVPAPEKRPARTQGPVKC  
ESPATTLWAQSELPDFGGNVLLAPAALYVCAKPQPPVVQPPEEAMSGQSRNPSSAAP  
VQSRGGIGASENLENPPKMGEELQSQASSGYASLLSSPPTESLQNPVLIQPDHSHYN  
LAQPINFSVLSNSHEKNQSWREALVGDPAVSSWALGGDSGENTSLSGIPITSSVLSLSL  
PSSVAQSNFPQSGGASEMVSNOQANLLVQPPSQPVENLVPESQKDRKAGSALPGFANSP  
AGSTSVVLVPPAHGTLVPDGNKANHSSHQEDTYGALDFTLSRTLENPVNVYNPSHSDSLA  
SQQSVASHPRQSGPGAPNLDRFYQQVTKDAQGQPLERAAQELVPPQQQASPPQLPKAMF  
SELSNPESLPAQQAQNSAQSPASLVLDAGQQLPPRPPQSSSVSLVSSGSGQAAVPSEQ  
PWPQVPALAPGPPPQDLAAYYYRPLYDAYQPQYSLPYPPPEGAASLYYQDVYSLYEPR  
YRPYDGAASAYAQNRYPEPERPSSRASHSSERPPRQGYPEGYSSKSGWSSQSDYYAS  
YYSSQYDYGDPGHWDYHYSARVRDPRTYDRRYWCDAEYDAYRREHSAFGDRPEKRDNNW  
RYDPRFTGSFDDDPDHRDPYGEVDRRSVHSEHSARSLHSAHSLASRRSSLSSHSHQSQ  
IYRSHNVAAGSYEAPLPPGSFHGDFAYGTYRSNFSSGPGFPEYGYPADTVWPAMEQVSSR  
PTSPEKFSVPHVCARFGPGGQLIKVIPNLPSEGQPALVEVHSMEALLQHTSEQEEMRAF  
GPLAKDDTHKVDVINFAQNKAMKCLQENLIDKESASLLWNFIVLLCRQNGTVVGTDIAE  
LLLDRHRTVWLPKSPNEANLIDFTNEAVEQVEEESGEAQLSFLTGGPAAAASSLERET  
ERFRELLLYGRKKDALESAMKNGLWGHALLLASKMDSRTHARVMTRFANSLPINDPLQTV  
YQLMSGRMPAASTCCGDEKWDWRPHLAMVLSNLNNNMDVESRTMATMGDTLASRGLLDA  
AHFCYLMAQAGFGVYTKKTKLVLIGSNHSLPFLKFATNEAIQRTEAYEYAQSLGAETCP  
LPSFQVFKFIYSCRLAEMGLATQAFHYCEAIAKSILTQPHLYSPVLISQLVQMASQLRLF  
DPQLKEKPEEESLAAPTWLVLHQQVERQIKEGAGVWHQDQALPQQCPGTPSSEMEQLDRP  
GLSQPGALGIANPLLAVPAPSPEHSSPSVRLLPSAPQTLPDGPLASPARVPMFPVPLPPG  
PLEPGPGCVTPGPALGFLEPSGGLPPGVPLQERRHLLQEARSPDPGIVPQEAPVGNLSL  
SELSEENFDGKFANLTPSRTVPDSEAPPGWDRADSGPTQPPLSLSPAPETKRPQAAKKE  
TKPEPKGESWFFRWLPKGGKTEAYLPDDKNKSIWDEKKNQWVNLNEPEEEKKAPPPPT  
SMPKTVQAAPPALPGPPGAPVNMYSRRAAGTRARYVDVNLNPSGTQRSEPALAPADFAVPL  
APLPINLNFVPTDAEEPQLPDGTGREGPAAARGLANPEPAPEPKVLSAASLPGSEL  
SSRPEGSQGGELSRCSMSLSREVSQHFNQAPGDLPAAGGPPSGAMPFYNPAQLAQACA  
TSGSSRLGRIGQRKHLVLN

>043933

MWGSRLAGAGGGAAVTVAFTNARD CFLHLPRRLVAQLHLLQNQAIEVVWSHQPAFLSW  
VEGRHFSQGENVAEINRQVGQKLGLSNGGQVFLKPCSHVSCQQVEVEPLSADDWEILE  
LHAVSLEQHLLDQIRIVFPKAIFFVWVDQQTYIFIQIVALIPAASYGRLETDTKLLIQPK  
TRAKENTFSKADA EYKKLHSYGRDQKGMKELQTKQLQSN TVGITESNENESEIPVDSS  
SVASLWTMIGSIFSFQSEKKQETS WGLTEINAFKNMQSKVPLDNI FRVCKSQPPSIYNA  
SATSVFHKHCAIHVFPWDQ EYFDVEPSFTV TYGKLVKLLSPKQQSKTKQNVLSPEKEKQ  
MSEPLDQKKIRSDHNEEDEKACVLQVVWNGLEELNNAIKYTKNVEVLHLGKVVIPDDLK  
RLNIEMHAVVRITPVEVTPKI PRSLKLPRENLPKDI SEEDIKTVFYSWLQQSTTTMLPL  
VISEEEFIKLETKDGLKEFSL SIVHSWEKEKDKNIFLLSPNLLQKTTIQVLLDPMVKEEN  
SEEIDFILPFLKLSLGGVNSLGVSSLEHITHSLLGRPLSRQLMSLVAGLRNGALLLTGG  
KSGSKSTLAKAICKEAFDKLDAHVERVDCKALRGKRL ENIQKTLEVAFSEAVWMQPSVVL

LDDLDLIAGLPAVPEHEHSPDAVQSQRLAHALNDMIKEFISMGSLVALIATSQSQQSLHP  
LLVSAQGVHIFQCVQHIQPPNQEQRCEILCNVIKNKLDKCDINKFTDLDLQHVAKETGGFV  
ARDFTVLVDRAIHSRSLRQSI STREKLVLTTLDFQKALRGFLPASLRSVNLHKPRDLGWD  
KIGGLHEVRQIILMDTIQLPAKYPELFANLPIRQRTGILLYGPPGTGKTLLAGVIARESRM  
NFISVKGPELLSKYIGASEQAVRDIFIRAQAAKPCILFFDEFESIAPRRGHDNTGVTDRV  
VNQLLTQLDQVGLQGVYVLAATSRPDLIDPALLRPGRLDKCVYCPPPQVSRLEILNVL  
SDSLPLADDVDLQHVASVTDSTFTGADLKALLYNAQLEALHGMLLSSGLQDQSSSSSDSLS  
LSSMVLNHSAGDGDGECGLDQSLVSEMLEILPDESKFNMYRLYFGSSYESELGN  
GTSSDLSSQCLSA PSSMTQDLPGVPGKDQLFSQPPVLR T ASQEGCQELTQEQRDQLRADI  
SIIKGRYRSQSGEDES MNQPGPIKTRLAISQSHLMTALGHTRPSISEDDWKNFAELYESF  
QNPKRKNQSGTMFRPGQKVTLA

>074941

MRCIVSYKSLRSCLVNVPELLLESISEPVQNYAVQAVVCKNDIKKTFYFGISGIPSQFSF  
EIDSTYAHTLKLAE NQEINLSIIDCTHEIEQLEIEPVTSNDWEIAERNAAWLEENLLVQY  
RVATTERFIIYLPSTFIQFQPLKLI PSSLCGRLLRTTEVLITPKPNTSAIEVKENRKNVN  
LRCVVENRLLPDSVTADSPALCVFLPLNFPDRPDVVYMDGGNLKSTIVCQCVCSPFQIPG  
HFFISKSLALSYSIKTGFKFQIWKAHNPPSSSKFILEQKGLPPESNLSSSELVAAKLKNSY  
LMDGMTLKLVDIAVSYSVSGLSGVVKNPIQDIKITSDTNVPVNAGIRNNSPRLSMQFPFH  
EFAQVRNAVFLHQNIYINGPKGCGKSNLVHSLFDYYSLSNIYFQMIVSCSEIDRSSFAKF  
QSFWNNVFIQAERYEPSIIYLDVHCLISSNENGE LGFVEEREIAFLQHQIINLKRKRK  
IIFIGFGEFLTFS ENLVLPLLFQIKIALPSLAVTRRKEILTTIFQENFSDITMDSIEFI  
SVKTEGYLMTDLVLFVKRLLSEAFVEKIQNGPKHLMNKGLIEKTLKDFVPLQLRKAKFVK  
SSIRWIDIAGMQEAKEAVRDIIESPVKYS LIYKQCRLRLPTGILLFGYPGCGKTYLASAI  
SSTFPVQFISIKGPELLDKYIGKSEQGVRDLFSRAQMAKPCV LFFDEFDSVAPRRGQDST  
GVTDRVVNQILTQMDGAESLDGVYIVAATTRPDMIDPALLRPGRLDKLIFCDLPNEEERL  
EVLQKLANRFHIENAAMLKKLSTLTDGYTYADLSSLLYDAHLIAVHKLLKRV SINAVDPS  
QTTSSFTNLTTESKRNASMLALPPESRYNQNMQSMSDSKSVVIEDYMLMEALKKNSPSLN  
SEEFHLSNL YRDFRSKLFEP ELPNARNTDVGSKTRQI

>075443

MNYSSFLRIWVSFIFALVQHQAQPRELMYPFWQNDTKTPKVDDGSSSEIKLAI PVFFFV  
PYRTVYVNNNGVVSFNVLVSQFTPE SFPLTDGRA FVAPFWADVHNGIRGEIYYRETMEPA  
ILKRATKDIRKYFKDMATFSATWVFI VTWEEVTFYGGSS TTPVNTFQAVLVSDGSYFTTL  
FNYYEINWTTGTASGGDPLTGLGGVMAQAGFNGGNLTNFFSLPGSRTPEIVNIQETT NVN  
VPGRWAFKVDGKEIDPANGCTSRGQFLRRGEVFWDDL NCTVKCRCLDFNNEIYCQEASCS  
PYEVCEPKGKFFYCSAVETSTCVVFGEPHYHTFDGFLFHFQGS CAYLLARQCLQTSSLPF  
FSVEAKNEHRRGSAVSWVKELSVEVNGYKILIPKGSYGRVKVNDLVTS L PVTLDLGT VKI  
YQSGISTAVETDFGLLVTFDGQHYASISVPGSYINSTCGLCGNYKNPLDDFLRPDGRPA  
MSVLDLGE SWRVYHADWKCDSGCVDNCTQCDAA TEALYFGSDYCGFLNKTDG PLWECGTV  
VDPTAFVHSCVYDLCSVRDNGTLLCQAIQAYALVCQALGIPIGDWRTQTGCVSTVQCPSF  
SHYSVCTSSCPDTCSDLTASRNCATPCTEGCECNQGFV LSTSQCVP LHKCGCDFDGHYYT  
MGEFFWATANCTVQCLCEE GGDVYCFNKTCGSGEVC AVEDGYQGCFPKRETVCLLSQNQV  
LHTFDGASYAFPSEFSYTLKTC PERPEYLEIDINKKKPDAGPAWLRGLRILVADQEVKI  
GGIGASEVKLNGQEVELPFFHPSGKLEIYRNKNSTTVESKGVVTVQYSDIGLLYIRLST  
YFNCTGGLCGFY NANASDEFCLPNGKCTDNLAVFLESWTTFEEICNGECG DLLKACNNS

ELLKFYRSRRCGIINDPSNSSFLECHGVVNVTAAYRTCLFRLCQSGGNESELCDSVARY  
ASACKNADVEVGPWRTYDFCPLCEPENSHFEECITCTETCETLTLGPICVDSCEGCQCD  
EGYALLGSQCVRSECGCNFEHQGLATNETFWVDLDCQIFCYCSGTDNRVHCETIPCKDD  
EYCMEEGLLYCQARTDASCIVSGYGHYLTDFGFPDFQTSCLPLILCTTGSRPSSDSFPK  
FVVTAKNEDRDPSSLALWVKQVDVTVFGYSIVIHRAYKHTVLVNSERLYLPLKLGQKINI  
FSFGFHVVVETDFGLKVVDWKTFLSITVPRSMQNSTYGLCGRYNGNPDDLEMPMGLLA  
SSVNEFGQSWVKRDTFCQVGCGRCPSCAKVEGFSKVQQLCSLIPNQNAAFSKCHSKVNP  
TFFYKNCLFDSCIDGGAVQTACSWLQNYASTCQTQGITVTGWRNYTSCTVTCPPNSHYES  
CVSVCQPRCAAIRLKSDCSHYCVEGCHCDAGYVLNGKSCILPHSCGCYSDGKYEPKQLF  
WNSDCTRRCRCFRNVIQCDPRQCKSDEECALRNGVRGCFSTKTSYCLAAGGVFRTFDG  
AFLRFPANCAFVLSTICQKLPDISFQLIINFDKWSAPNLTIISPVFYFINEEQILINDRN  
TVKVNGTQVNVPFITGLATKIYSSEGFLVIDTSPDIQIYYNGFNVIKISISERLQNKVCG  
LCGNFNGDLTDDYVTLRGKPVVSSVLAQSWKTNGMQKRPLAPSCNELQFSQYAAMCDNV  
HIQKMQGDGYCLKLTDMKGGFFQPCYGLLDPLPFYESCYLDCYSHKKFQLCGSLAAYGEA  
CRSEFGLSTEWIEKENCSGVVEDPCVGADCPNRTCELNGRELCGCIEPPIYGNNSHDI  
DAEVTCKAAQMEVSIKCKLFLGFEREGVRINDRQCTGIEGEDFISFQINNTKGNCGNI  
VQSNGTHIMYKNTLWIESANNTGNIITRDRTINVEFSCAYELDIKISLDSVVKPMLSVIN  
LTVPTQEGSFITKMALYKNASYKHPYRQGEVVLTRDVLVYGVFVVGADATHLILTLNKC  
YATPTRDSNDKLRFYFIEGGCQNLKDNTIGIEENAVSLTCRFHVTVFKFIGDYDEVHLHC  
AVSLCDSEKYSCKITCPHNSRIATDYTKEPKEQII SVGPIRRKRLDWCEDNGGCEQICTS  
RVDGPLCSCVGTGLQEDGKSCRASNSSMELQVWTLILLIMIQLSLWHFVYKSGTTS  
>O75874

MSKKISGGSVVEMQGDEMTRI IWELIKEKLI FPYVELDLHSYDLGIENRDATNDQVTKDA  
AEA I KKHNVGKCATITPDEKRVEEFKLKQMWKSPNGTIRNILGGTVFREAII CKNIPRL  
VSGWVKPII IGRHAYGDQYRATDFVVPGPVKVEITYTPSDGTQKVTYLVHNFEEGGGVAM  
GMYNQDKSIEDFAHSSFQMALSKGWPLYLSTKNTILKKYDGRFKDIFQEIYDKQYKSQFE  
AQKIWEHRLIDDMVAQAMKSEGGFIWACKNYDGDVQSDSVAQGYGSLGMMTSVLVCPDG  
KTVEAAAHGTVTRHYRMYQKGQETSTNPIASIFAWTRGLAHRAKLDNNKELAFFANALE  
EVS IETIEAGFMTKDLAACIKGLPNVQRSDYLNTFEFMDKLGENLKI KLAQAKL  
>P21549

MASHKLLVTPPKALLKPLSIPNQLLLGPGPSNLPPRIMAAGGLQMI GMSKDMYQIMDEI  
KEGIQYVFQTRNPLTLVISGSGHCALEAALVNVLEPGDSFLVGANGIWGQRAVDIGERIG  
ARVHPMTKDPGGHYTLQEEVEGLAQHKPVLLFLTHGESSTGVLQPLDGFGE LCHRYKCLL  
LVDSVASLGGTPLYMDRQGIDILYSGSQKALNAPPGTSLISFSDKAKKKMYSRKT KPF SF  
YLDIKWLANFWGCDDQPRMYHHTIPVISL YSLRESLALIAEQGLENSWRQHREAAAYLHG  
RLQALGLQLFVKDPALRLPTVTTVAVPAGYDWRDIVSYVIDHFDIEIMGGLGPSTGKVLR  
IGLLGCNATRENVDRVTEALRAALQHCPKKKL  
>P24004

MTTTRKRLKFENLRIQFSNAIVGNFLRLPHS I INVLESTNYA IQEFGIAVHSHNSDIPIVH  
LGWDGHDGSGSSENVVLINPVLATVYDLNQKSPVDLYIQRYDHTHLATEVYVTPETSDDW  
EIIDANAMRFQNGEILHQTRIVTPGETLICYLEGIVTKFKIDRVEPSMKSARITDGLSVV  
VAPKVNKTRLVKA EYGHSNKTILKNGAIQLLKKVILRSTVCKMDFPKDNLFVVYISDGAQ  
LPSQKGYASIVKCSLRQSKKSDSDNKS VGI PSKKIGVFIKCD SQIPENHIALSSHLWDAF  
FTHPMNGAKIKLEFLQMNQANIISGRNATVNIKYFGKDVPTKSGDQYSKLLGGSLLTNNL

ILPTEQIIIEIKKGESEQQLCNLNEISNESVQWKVTQMGKEEVKDI IERHLPKHYHVKET  
GEVSRTSKDEDDFITVNSIKKEMVNYLTSP I IATPAI I LDGKQGIGKTRLLKELINEVEK  
DHHIFVKYADCETLHETSNDKTQKLIMEWC SFCYWYGPSLIVLDNVEALFGKPQANDGD  
PSNNGQWDNASKLLNFFINQVTKIFNKDNKRIRVLFSGKQKTQINPLLFDKHFVSETWSL  
RAPDKHARAKLLEYFFSKNQIMKLNRLDQFSDLSLETEGFSPLDLEIFTEKIFYDLQLER  
DCDNVVTRELFSSLSAFTPSALRGVKLTKETNIKWGDIGALANAKDVLLETLEWPTKYE  
PIFVNCPLRLRS GILLYGYPGCGKTL LASAVAQQCGLNFISVKGPEILNKFIGASEQNIR  
ELFERAQSVKPCILFFDEFDSIAPKRGHSTGVTDRVVNQLLTQMDGAEGLDGVYILAAT  
SRPDLIDSALLRPGRLDKSVICNIPTESERLDILQAIVNSKDKDTGQKKFALEKNADLKL  
IAEKTAGFSGADLQGLCYNAYLKS VHRWLSAADQSEVVP GNDNIEYFSINEHGRREENRL  
RLKTLQDQDVVHETKTSTSAASELTAVVTINDLLEACQETKPSISTSELVKLRGIYDRFQ  
KDRNGEMPNGENSIDIGSRLSLM

>P70473

MALRGVRVLELAGLAPGPF CGMILADFGAEVVLVDRLG SVNHPSHLARGKRSLALDLKRS  
PGA AVLRRMCARADV LLEPFRCGVMEK LQLGPETLRQDNPKLIYARLSGFGQSGIFSKVA  
GHDINYVALSGVLSKIGRSGENPYPLNLLADFGGGLMCTLGILLALFERTRSGLGQVI  
DANMVEGTAYLSTFLWKTQAMGLWAQPRGQNLLDGGAPFYTTYKTADGEFMAVGAIEPQF  
YTL LKGLGLESEELPSQMSIEDWP EMKKKFADVFARKTKAEWCQIFDGTDACVTPVLT  
EEALHHQHNRERGSFITDEEQHACPRPAPQLSRTPAVPSAKRDPSVGEHTVEVLKDYGFS  
QEEIHLHSDRIIESNK LKANL

>Q03426

MLSEVLLVSAPGKVILHGEHAVVHGKVALAVSLNLR TFLRLQPHSNGKVDLSLPNIGIKR  
AWDVARLQSLDTSFLEQGDVTTPTSEQVEKLKEVAGLPDDCAVTERLAVLAFLYLYLSIC  
RKQRALPSLDIVVWSELPPGAGLGSSAAYSVCLAAALLTVCEEIPNPLKDGDCVNRWTK  
DLELINKWAFQGERMIHGNPSGVDNAVSTWGGALRYHQGKISSLKRSPALQILLTNTKVP  
RNTRALVAGVRNRLKFP EIVAPLLT SIDAISLECERVLGEMGEAPEQYLVLEELIDM  
NQHHLNALGVGHASLDQLCQVTRARGLH SKLTGAGGGGCGITLLKPGLEQPEVEATKQAL  
TSCGFDCLETSIGAPGVSIHSATSLDSRVQQALDGL

>Q8R537

MSAARTLRVPGRHGYAAEFSPYLPGR LACAAAQHYGIAGCGTLIILDQNQSGLQIFRSFD  
WSDGLFDVTWSEDNEHVLVTCSGD GSLQLWDTAKATGPLQVYKEHTQEVYSVDWSQTRGE  
QLVVSGSWDQTVKVDPTVGNLCTFRGHESVIYSTIWSPHIPGCFASASGDQTLRIWDV  
KTAGVRIVIPAHQTEILSCDWCKYENENLVVTGAVDCSLRGWDLRNVRQPVFELLGHTYAI  
RRVKFSPFHASV LASC SYDFTVRFWNFSKPDPLETVEHHT EFTCGLDLSLQSPTEVADC  
SWDETIKIYDPVCLTVPG

>Q9UHK6

MALQGISVVELSGLAPGPF CAMVLADFGARVVRVDRPGSRYDVSRLGRGKRSLVLDLKQP  
RGA AVLRR LCKRSDV LLEPFRRGVMEK LQLGPEILQRENPRLIYARLSGFGQSGSFCRLA  
GHDINYLALSGVLSKIGRSGENPYAPLNLLADFAGGGLMCALGIIMALFDRTRTGKGQVI  
DANMVEGTAYLSSFLWKTQKLSLWEAPRGQNMLDGGAPFYTTYRTADGEFMAVGAIEPQF  
YELLIKGLGLKSDEL PNQMSMDDWP EMKKKFADVFAEKTKAEW CQIFDGTDACVTPVLT  
EEVVHHDHNKERGSFITSEEQDVS PRPAPLLLNTPAIP SFKRDPFIGEHTEEILEEFGFS  
REEIYQLNSDKIIESNKVKASL

>Q9Y3D6

MEAVLNELVSVEDLLKFEKKFQSEKAAGSVSKSTQFEYAWCLVRSKYNDDIRKGIVLLEE  
LLPKGSKEEQRDYVFYLA VGN YRLKEYEKALKYVRGLLQTEPQNNQAKELERLIDKAMKK  
DGLVGM AIVGGMALGVAGLAGLIGLAVSKSKS
