# Supplementary material for: iLoc-Hum: using the accumulation-label scale to predict subcellular locations of human proteins with both single and multiple sites
Source: Royal Society of Chemistry journal article supplement (doi:10.1039/c1mb05420a), 2011-12-01
Supplement: c1mb05420a_5.pdf [file c1mb05420a_5.pdf]

**Online Supporting Information S3a.** The degenerate testing dataset used for a head-to-head comparison between **Wolf PSORT** (Horton, et al. *Nucleic Acids Res* 35, W585-587) and **iLoc-Hum** of this paper. The dataset contains 300 single-location proteins classified into the following nine subcellular location sites: (1) cytoplasmic, (2) cytoskeleton, (3) endoplasmic reticulum, (4) extracellular, (5) Golgi apparatus, (6) lysosomal, (7) mitochondrion, (8) nuclear, (9) peroxisomal, and (10) plasma membrane, with each containing 30 protein sequences that were randomly picked from Swiss-Prot database (Release 2011\_06 of 31-May-11). To avoid bias, none of the proteins included here occurs in the training dataset of **Wolf PSORT**, nor in the training dataset of **iLoc-Hum**. See the text of the paper for further explanation.

---

(1) 30 cytoplasmic proteins

>O15530

MARTTSQLYDAVPIQSSVVLCSPPSPSMVRTQTESSTPPGIPGGSRQGPAMDGTAAEPRP  
GAGSLQHAQPPPQPRKKRPEDFKFKILGEGSFSTVVLARELATSREYAIKILEKRHIK  
ENKVPYVTRERDVMRDLHPFFVKLYFTFQDDEKLYFGLSYAKNGELLKYIRKIGSFDET  
CTRFYTAEIVSALEYLHGKGIHRDLKPENILLNEDMHIQITDFGTAKVLSPEKQARAN  
SFVGTAYVSPPELLTEKSACKSSDLALGCIYQLVAGLPPFRAGNEYLIFQKIIKLEYDF  
PEKFFPKARDLVEKLLVLDATKRLGCEEMEGYGPLKAHPFFESVTENLHQQTTPKLTAYL  
PAMSEDDDCYGNYNLLSQFGCMQVSSSSSSSHLSASDTGLPQRSNSIEQYIHDLDNS  
SFELDLQFSEDEKRLLEKQAGGNPHQFVENNLI LKMGPVDRKGLFARRRQLLLTEGPH  
LYYVDPVNKVLKGEIPSQELRPEAKNFKTFVHTPNRTYYLMDPSGNAHKCRKIQEVRQR  
YQSHPDAAVQ

>O60271

MELEDGVVYQEEPGGSGAVMSERVSGLAGSIYREFERLIGRYDEEVVKELMPLVVAVLEN  
LDSVFAQDQEHQVELELLRDDNEQLITQYEREKALRKHAEEKFIEFEDSQEQEKDLQTR  
VESLESQTRQLELAKNYADQISRLEEREAEKKEYNALHQRHTEMIHNYMEHLERTKLH  
QLSGSDQLESTAHSRIRKERPISLGIFFPLPAGDGLLTPDAQKGGETPGSEQKFQELSQPR  
SHTSLKVSNSPEPQAVEQEDELSDVSQGGSKATTPASTANSDVATIPTDTPKKEENEGF  
VKVTDAPNKSEISKHIEVQVAQETRNVTGSAENEKSEVQAI IESTPELDMDKDLGKYK  
GSSTPTKGIENKAFDRNTESLFEELSSAGSGLIGDVDEGADLLGMGREVENLILENTQLL  
ETKNALNIVKNDLIAKVDELTCCKDVLQGELEAVKQAKLKLEKNRELEELRKARAEAE  
DARQKAKDDDDSDIPTAQRKRFRVEMARVLMERNQYKERLMELQEA VRTEMIRASREN  
AMQEKKRSSIQFFSRLFSSSNNTTKKPEPPVNLKYNAPTSHVTPSVKKRSSTLSQLPGDK  
SKAFDFLSEETEASLASRREQKREQYRQVKAHVQKEDGRVQAFGSLPQKYKQVTNGQGEN  
KMKNLPPVYLRPLDEKDTSMKLCVGVNLSGGKTRDGGSVVGASVFYKDVAGLDTEGSK  
QRSASQSSLDKLDQELKEQKELKNQEELSSLVICTSTHSATKVLIIIDAVQPGNILDST  
VCNSHVLCIASVPGARETDYPAGEDLSESGQVDKASLCGSMTSNSSAETD SLLGGITVVG  
CSAEGVTGAATSPSTNGASPVMDKPPMEMEAENSEVDENVPTAEEATEATEGNAGSAEDTV  
DISQTGVYTEHVFTDPLGVQIPEDLSPVYQSSNDS DAYKQDISVLPNEQDLVREEAQKMS  
SLLPTMLGAQNGCLYVHSSVAQRKCLHSIKLKDSILSIVHVKGIVLVALADGTLAIFHRG  
VDGQDLSNYHLLDLGRPHHSIRCMTVVHDKVCGYRNKIYVVPKAMKIEKSFDAHPRKES  
QVRQLAVGDGVVSI RLDSTLRLYHAHTYQHLQDV DIEPYVSKMLGTGKLGFSFVRITALM

VSCNRLVGTGNGV I I S I P L T E T N K T S G V P G N R P G S V I R V Y G D E N S D K V T P G T F I P Y C S M A  
H A Q L C F H G H R D A V K F F V A V P G Q V I S P Q S S S S G T D L T G D K A G P S A Q E P G S Q T P L K S M L V I S  
G G E Y I D F R M G D E G G E S E L L G E D L P L E P S V T K A E R S H L I V Q V M Y G N E

>O94806

M S A N N S P P S A Q K S V L P T A I P A V L P A A S P C S S P K T G L S A R L S N G S F S A P S L T N S R G S V H T V  
S F L L Q I G L T R E S V T I E A Q E L S L S A V K D L V C S I V Y Q K F P E C G F F G M Y D K I L L F R H D M N S E N  
I L Q L I T S A D E I H E G D L V E V V L S A L A T V E D F Q I R P H T L Y V H S Y K A P T F C D Y C G E M L G L V R Q  
G L K C E G C G L N Y H K R C A F K I P N N C S G V R K R R L S N V S L P G P G L S V P R P L Q P E Y V A L P S E E S H  
V H Q E P S K R I P S S G R P I M E K M V M C R V K V P H T F A V H S Y T R P T I C Q Y C K R L L K G L F R Q G M Q C K  
D C K F N C H K R C A S K V P R D C L G E V T F N G E P S S L G T D T D I P M D I D N N D I N S D S S R G L D D T E E P  
S P P E D K M F F L D P S D L D V E R D E E A V K T I S P S T S N N I P L M R V V Q S I K H T K R K S S T M V K E G M V  
H Y T S R D N L R K R H Y R L D S K C L T L F Q N E S G S K Y Y K E I P L S E I L R I S S P R D F T N I S Q G S N P H C  
F E I I T D T M V Y F V G E N N G D S S H N P V L A A T G V G L D V A Q S E K A I R Q A L M P V T P Q A S V C T S P G Q  
G K D H K D L S T S I S V S N C Q I Q E N V D I S T V Y Q I F A D E V L G S G Q F G I V Y G G K H R K T G R D V A I K V  
I D K M R F P T K Q E S Q L R N E V A I L Q N L H H P G I V N L E C M F E T P E R V F V V M E K L H G D M L E M I L S S  
E K S R L P E R I T K F M V T Q I L V A L R N L H F K N I V H C D L K P E N V L L A S A E P F P Q V K L C D F G F A R I  
I G E K S F R R S V V G T P A Y L A P E V L R S K G Y N R S L D M S V G V I I Y V S L S G T F P F N E D E D I N D Q I Q  
N A A F M Y P P N P R E I S G E A I D L I N N L L Q V K M R K R Y S V D K S L S H P L Q D Y Q T L D L R E F E T R I G E  
R Y I T H E S D D A R E I H A Y T H N L V Y P K H F I M A P N P D D M E E D P

>O94827

M D D Q S P A E K K G L R C Q N P A C M D K G R A A K V C H H A D C Q Q L H R R G P L N L C E A C D S K F H S T M H Y D  
G H V R F D L P P Q G S V L A R N V S T R S C P P R T S P A V D L E E E E E E S S V D G K G D R K S T G L K L S K K K A  
R R R H T D D P S K E C F T L K F D L N V D I E T E I V P A M K K K S L G E V L L P V F E R K G I A L G K V D I Y L D Q  
S N T P L S L T F E A Y R F G G H Y L R V K A P A K P G D E G K V E Q G M K D S K S L S L P I L R P A G T G P P A L E R  
V D A Q S R R E S L D I L A P G R R R K N M S E F L G E A S I P G Q E P P T P S S C S L P S G S S G S T N T G D S K N R  
A A S R F S G F F S S G P S T S A F G R E V D K M E Q L E G K L H T Y S L F G L P R L P R G L R F D H D S E E E Y D E D  
E D E D N A C L R L E D S R E L I D G H E K L T R R Q C H Q Q E A V E L L H T E A S Y I R K L R V I I N L F L C C L L N  
L Q E S G L L C E V E A E R L F S N I P E I A Q L H R R L A S V M A P V L E K A R R T R A L L Q P G D F L K G F K M F G  
S L F K P Y I R Y C M E E E G C M E Y M R G L L R D N D L F R A Y I T A E K H P Q C Q R L K L S D M L A K P H Q R L T K  
Y P L L L K S V L R K T E E P R A K E A V V A M I G S V E R F I H H V N A C M R Q R Q E R Q R L A A V V S R I D A Y E V  
V E S S S D E V D K L L K E F L H L D L T A P I P G A S P E E T R Q L L L E G S L R M K E G K D S K M D V Y C F L F T D  
L L L V T K A V K K A E R T R V I R P P L L V D K I V C R E L R D P G S F L L I Y L N E F H S A V G A Y T F Q A S G Q A  
L C R G V D T I Y N A Q N Q L Q L R A Q E P P G S Q Q P L Q S L E E E E D E Q E E E E E E E E E E E G E D S G T S A  
A S S P T I M R K S S G S P D S Q H C A S D G S T E T L A M V V E P G D T L S S P E F D S G P F S S Q S D E T S L S T  
T A S A T P T S E L L P L G P V D G R S C S M D S A Y G T L S P T S L Q D F V A P G P M A E L V P R A P E S P R V P S  
P P P S P R L R R R T P V Q L L S C P P H L L K S K S E A S L L Q L L A G A G T H G T P S A P S R S L S E L C L A V P A  
P G I R T Q G S P Q E A G P S D C R G A P S P G S G P G L V G C L A G E P A G S H R K R C G D L P S G A S P R V Q P E P  
P P G V S A Q H R K L T L A Q L Y R I R T T L L L N S T L T A S E V

>O95208

M T T S S I R R Q M K N I V N N Y S E A E I K V R E A T S N D P G P S S S L M T E I A D L T Y N V V A F S E I M S M V K  
R L N D H G K N R H V Y K A L T L L D Y L I K T G S E R V A Q Q C R E N I F A I Q T L K D F Q Y I D R D G K D Q G I N V  
R E K S K Q L V A L L K D E E R L K A E R A Q A L K T K E R M A Q V A T G M G S N Q I T F G R G S S Q P N L S T S H S E  
Q E Y G K A G G S P A S Y H G S P E A S L C P Q H R T G A P L G Q S E E L Q P L S Q R H P F L P H L G L A S R P N G D S  
Q P C L T C D R A A R A T S P R V S S E L E Q A R P Q T S G E E E L Q L Q L A L A M S R E V A E Q E E R L R R G D D L R

LQMALEESRRDVTVKIPKKKEHGSLPQQTTLLDLMDALPSSGPAAQKAEFGPSASTNQTNP  
GGPAAPASTSDPPSFGTKPAASIDPGVPTGATVQSVPKNSDPAASQQPASSAGKRASDAG  
AVSTTKPVSVSGSFELFSNLNGTIKDDFSEFDNLRTSKKTAESVTSLSQNNGTTSPDPF  
ESQPLTVASSKPSARKTPESFLGPNAALVNLDSLVTTRPAPPAQSLNPFLLAPGAPATSAP  
VNPFOVNQPQPLTLNQLRGSFVLGTSTSFSGPGVSMASMTSAAQPALGATGSSLT  
PLGPAMNMVGSVGIPPSAAQATGTTNPFLL

>P06753

MEAIKKKMQMLKLDKENALDRAEQAEAEQKQAEERSKQLEDELAAMQKKLKGTEDELDKY  
SEALKDAQEKLELAEKKAADAEAEVASLNRRIQLVEEELDRAQERLATALQKLEEAEKAA  
DESERGMKVIENRALKDEEKMELQEIQLKEAKHIAEEADRKYEEVARKLVIIEGDLERTE  
ERAELAESKCSLEEEELKNVTNNLKSLEAQAEKYSQKEDKYEIEIKILTDLKKEAETRAE  
FAERSVAKLEKTIDDELEDELYAQKLYKAISEELDHALNDMTSI

>P07437

MREIVHIQAGQCGNQIGAKFEVISDEHGIDPTGTYHGSDQLDRISVYYNEATGGKYVP  
RAILVDLEPGTMDSVRSFGQIFRPDNFVFGQSGAGNNAKGHYTEGAELVDSVLDVVRK  
EAESCDCLQGFQLTHSLGGGTGSGMGTLLISKIREEYPDRIMNTFSVVPSPKVSOTVVEP  
YNATLSVHQLVENTDETYCIDNEALYDICFRTLKLTPTTYGDLNHLVSATMSGVTTCLR  
PGQLNADLRKLAVMVFPRLHFFMPGFAPLTSRGSQQYRALTVPELTQQVFDKNNMAA  
CDPRHGRYLTVAAVFRGRMSMKEVDEQMLNVQKNSSYFVEIPNNVKTAVCDIPRGLKM  
AVTFIGNSTAIQELFKRISEQFTAMFRRKAFLHYTGEGMDEMEFTEAESNMNDLVSEYQQ  
YQDATAEEEEEDFGEEAEAAA

>P07947

MGCIKSKENKSPAICYRPENTPEPVSTSVSHYGAEPTTVSPCPSSSAKGTAVNFSSLSMT  
PFGGSSGVTPFGGASSSFSVVPSSYPAGLTGGVTIFVALYDYEARTTEDLSFKKGERFQI  
INNTEGDEARSIAATGKNGYIPSNYVAPADSIQAEYFYGKMGKDAERLLLLNPGNQRGIFL  
VRESETTKGAYSLSIRDDEIRGDNVKKHYKIRKLDNGGYYITTRAQFDTLQKLVKHYTEHA  
DGLCHKLTTVCPTVKPQTQGLAKDAEIPRESLRLEVKLGQCGFGEVMGTNGTTKVAIKTL  
KPGTMMPEAFLQEAQIMKKLRHDKLVPLYAVVSEEPYIVTEFMSKGSLLDFLKEGDGKY  
LKLPLVDMAAQIADGMAYIERMNYIHRDLRAANILVGENLVCKIADFGLARLIEDNEYT  
ARQGAKFPIKTAPEAALYGRFTIKSDVSFGILQTELVTKGRVPYPMVNREVLEQVERGY  
RMPCPQGCPESLHELMNLCKKDPDERPTFEYIQSFLEDYFTATEPQYQGENL

>P08107

MAKAAAIGIDLGTYSVGVFQHGKVEIIANDQGNRTTPSYVAFTDTERLIGDAAKNQVA  
LNPQNTVFDKRLIGRKFQDPVQSDMKHPFQVINDGDKPKVQVSYKGETKAFYPEEISS  
MVLTKMKEIAEAYLGYPVTNAVITVPAYFNDSQRQATKDAGVIAGLNLVRIINEPTAAAI  
AYGLDRTGKGERNVLI FDLGGGTFDVSILTIDGIFEVKATAGDTHLGGEDFDNRLVNH  
VEEFKRKHKKDISQNKRAVRRRLTACERAKRTLSSSTQASLEIDSLFEGIDFYTSITRAR  
FEELCSDLFRSTLEPVEKALRDAKLDKAIHDLVVLVGGSTRIPKVQKLLQDFNGRDLNK  
SINPDEAVAYGAAVQAAIILMGDKSENVQDLLLLDVAPLSLGLTAGGVMTALIKRNSTIP  
TKQTQIFTTYSDNQPGVLIQVYEGERAMTKDNNLLGRFELSGIPPAPRGVPIEVTFDID  
ANGILNVTATDKSTGKANKITITNDKGRLSKEEIERMVQEAKEYKAEDDEVQRERSAKNA  
LESYAFNMKSAVEDEGLKGI SEADKKKVLKDCQEVISLDANTLAEKDEFEHKRKELEQV  
CNPIISGLYQAGGPGPGGFGAQQPKGGSGSGPTIEEVD

>P08238

MPEEVHHGEEVETFAFQAEIAQLMSLIINTFYSNKEIFLRELI SNASDALDKIRYESLT  
DPSKLD SGKELKIDIIPNPQERTLTLVDTGIGMTKADLINNLGTIAKSGTKAFMEALQAG  
ADISMIGQFGVGFYSAYLVAEKVVVITKHNDDEQYAESSAGGSFTVRADHGEPIGRGTKV  
ILHLKEDQTEYLEERRVKEVVKKHSQFIGYPITLYLEKEREKEISDDEAEKEKEEED  
KDDEEKPKIEDVGSDEEDDSGKDKKKKTKKIKEYIDQEELNKT KPITRNPDDITQEEYG  
EFYKSLTNDDEDHLAVKHFSVEGQLEFRALLFIPRRAPFDLFENKKKKNNIKLYVRRVFM  
DSCDELIPEYLNFI RGVVDS EDLPLNISREMLQQSKILKVI RKNIVKKCLELFS ELAEDK  
ENYKFFYAFSKNLKLG IHEDSTNRRRLSELLRYHTSQSGDEMTSLSEYVSRMKETQKSI  
YYITGESKEQVANS AFVERVRKRGF EVVYMTEPIDEYCVQQLKEFDGKSLSVTKEGLEL  
PEDEEKKKMEESKAKFENLCKLMKEILDKKVEKVTISNRLVSSPCCIVTSTYGTANMER  
IMKAQALRDNSTMGYMAKKHLEINPDHPIVETLRQKAEADKNDKAVKDLVLLFETALL  
SSGFSLEDPQTHSNRIYRMIKLG LGIDEDEVA AEEPNA AVPEI PPLEGDEDASRMEEVD  
>P08631

MGGRSSCEDPG CPRDEERAPRMGCMKSKFLQVGGNTFSKTETSASPHCPVYVPDPTSTIK  
PGPN SHNSNTPGIREAGSEDIIVVALYDYEAIHHEDLSFQKGDQMVVLEESGEKARSLAT  
RKEGYIPSNYVARVDSLETEEFFKGISRKDAERQLLAPGNMLGSFMIRDSETTKGSYSLS  
VRDYDPRQGD TVKH YKIR TLDNGGFYI SPRSTFSTLQELVDHYKKGNDGLCQKLSVPCMS  
SKPQKPEKDAEIPRESL KLEKKGAGQFGEVMATYNKHTKVAVKTMKPGSMSVEAFLAEA  
NVMKTLQHDKLVKLVHAVVTKEPIYIITEFMAKGSLLDFLKSDEGSKQPLPKLIDFSAQIA  
EGMAFIEQRNYIHRDLRAANI LVSASLVCKIADFLARVIEDNEYTAREGAKFPIKTAPE  
AINFGSFTIKSDVSFGILLMEIVTYGRIPYPGMSNPEVIRALERGYRMPRPENCPEELYN  
IMMRCKNRPEERPTFEYIQSVLDDFYTATESQYQQQP  
>P09210

MAEKPKLHYSNIRGRMESIRLLAAAGVEFEEKFIKSAEDLDKLRNDGYLMFQQVPMVEID  
GMKLVQTRAILNYIASKYNLYGKDIKEKALIDMYIEGIADLGEMILLLPFSQPEEQDAKL  
ALIQEKTKNRYFP AF EKVLKSHGQDYLVGNKLSRADIHLVELLYYVEELDSSLISSFPLL  
KALKTRISNLPTVKKFLQPGSPRKPPMDEKSL EESRKIFRF  
>P0CG30

MGLELFLDLVSQPSRAVYIFAKKNGIPELELRTVDLVKGQHKSK EFLQINSLGKLPTLKD G  
DFILTESSAILIYLSCKYQTPDHYPSDLQARARVHEYLGHADCIRGTFGIPLVQVLGPLI  
GVQVPEEKVERNRTAMDQALQLEDKFLGDRPFLAGQQVTLADLMALEELMQPVALGYELF  
EGRPRLAARGRVEAFLGAELCQEAHSIILSILEQA AKKTLPTPSPEAYQAMLLRIARIP  
>P11142

MSKGPVAGIDLGT TYSCVGVFQHGKVEI IANDQGNRTTPSYVAFTDTERLIGDAAKNQVA  
MNPTNTVFD AKRLIGRRFDDAVVQSDMKHPFMVNDAGRPKVQVEYKGETKSFYPEEVSS  
MVLTKMKEIAEAYLGKTVTNAVVTVPAYFNDSQRQATKDAGTIAGLNLVRIINEPTAAAI  
AYGLDKKVGAE RNVLI FDLGGGTFDVSILTIEDGIFEVKSTAGDTHLGGEDFDNRMVNHF  
IAEFKRKHKKDI SENKRAVRRLRTACERAKRTLSSSTQASIEIDSLYEGIDFYTSITRAR  
FEELNADLFRGTLDPVEKALRDAKLDKSQIHDIVLVGGSTRIPKI QKLLQDFFN GKELNK  
SINPDEAVAYGAAVQAAILSGDKSENVQDLLLLLDVTPLSLGIETAGGVM TVLIKRNTTIP  
TKQTQTFTTYSDNQPGVLIQVYEGERAMTKDNLLGKFELTGIPAPRGPVQIEVTFDID  
ANGILNVS AVDKSTGKENKITITNDKGRLSKEDIERMVQEA EKYKAEDEKQRDKVSSKNS  
LESYAFNMKATVEDEKLGKINDEDKQKILDKCNEIINLDKNQTAEKEEFHQQKELEKV  
CNPIITKLYQSAGGMPGGMPGGFPGGGAPPSGGASSGPTIEEVD

>P11802

MATSRYEPAEIGVGAYGTVYKARDPHSGHFVALKSVRVPNGGGGGGLPISTVREVALL  
RRLEAFEHPNVVRLMDVCATSRTDREIKVTLVFEHVDQDLRTYLDKAPPPGLPAETIKDL  
MRQFLRGLDFLHANCIVHRDLKPENILVTSGGTVKLADFGGLARIYSYQMALTPVVVTLR  
APEVLLQSTYATPVDMSVGCIFAEMFRRKPLFCGNSEADQLGKIFDLIGLPPEDDPRDVS  
LPRGAFPPRGRPVQSVVPEMEESGAQLLLEMLTFNPHKRISAFRALQHSYLHKDEGNPE  
>P46439

MPMTLGYDIRGLAHAIRLLLEYPDSSYVEKKYTLGDAPDYDRSQLNEKFKLGLDFPNLPY  
LIDGAHKITQSNAILRYIARKHNLCGETEEEEKIRVDILENQVMDNHMELVRLCYDPDFEK  
LKPYLEELPEKLYSEFLGKRPFAGDKITFVDFLAYDVLDMKRIFEPKCLDAFLNLKD  
FISRFEGLKKISAYMKSSQFLRGLLFGKSATNSK

>P48594

MNSLSEANTKFMFDLFQQFRKSKENNIIFYSPISITSALGMVLLGAKDNTAQQISKVLHFD  
QVTENTTEKAATYHVDRSGNVHHQFQKLLTEFNKSTDAYELKIANKLFGKTYQFLQEYL  
DAIKKFYQTSVESTDFANAPEESRKKINSVESQTNEKIKNLPDGTIGNDTTLVLVNAIY  
FKGQENKFKKENTKEEKFPNKNTYKSVQMMRQYNSFNFALLEDVQAKVLEIPYKGDLSM  
IVLLPNEIDGLQKLEKLTAEKLMETSLQNMRETCVDLHLPRFKMEESYDLKDTLRTMGM  
VNIFNGDADLSGMTSHGLSVSKVLHKAFFEVEEGVEAAAATAVVVVELSSPSTNEEFCC  
NHPFLFFIRQNKTNSILFYGRFSSP

>P50224

MELIQDTSRPPLEYVKGVPLIKYFAEALGPLQSFQARPDDLLINTYPKSGTTVSQILDMI  
YQGGDLEKCNRAPIYVRVPFLEVNDPGEPSGLETCLKDTPPPRLIKSHLPLALLPQTLDDQ  
KVKVYVARNPKDVAVSYYHFHRMEKAHPEPGTDSFLEKFMAGEVSYGSYQHVQEELSRT  
HPVLYLFYEDMKENPKREIQKILEFVGRSLPEETMDFMVQHTSFKEMKKNPMTNYTTVPQ  
ELMDHSISPFMRKGMAGDKTTFTVAQNERFDADYAEKMAGCSLSFRSEL

>P50226

MELIQDISRPPLEYVKGVPLIKYFAEALGPLQSFQARPDDLLISTYPKSGTTVSQILDMI  
YQGGDLEKCHRAPIFMRVPFLEFKVPGIPSGMETLKNTPAPRLLKTHLPLALLPQTLDDQ  
KVKVYVARNAKDVAVSYYHFYHMAKVYPHPGTESFLEKFMAGEVSYGSYQHVQEELSRT  
HPVLYLFYEDMKENPKREIQKILEFVGRSLPEETVDLMVEHTSFKEMKKNPMTNYTTVRR  
EFMDHSISPFMRKGMAGDKTTFTVAQNERFDADYAKKMAGCSLSFRSEL

>P57078

MEGDGGTPALALLRTFDAGEFTGEKVGSGGFGQVYKVRHVHKT LAIKCSPSLHVDDRERM  
ELLEEAKKMEMAKFRYILPVYGICREPVGLVMEYMETGSLEKLLASEPLPDLRFRIIHET  
AVGMNFLHCMAPPLLHLDLKPANILLDAHVHKISDFGLAKCNGLSHSHDLSMDGLFGTI  
AYLPPERIREKSRLFDTKHDVYSFAIVIGVLTQKKPFADEKNILHIMVKVKGHRPELPP  
VCRARPRACSHLIRLMQRCQGDPRVRPTFQGNGLNGELIRQVLAALLPVTGRRSPGEGFR  
LESEVIIRVTCPLSSPQEITSETEDLCEKPDDEVKETAHDLDVKSPPEPRSEVVPARLKR  
ASAPTFDNDYSLSELLSQLDSGVSQAVEGPEELSRSSSESKLPSSGSGKRLSGVSSVDSA  
FSSRGSLSLSEFEREPSTSDLGTTDVQKKLVDAIVSGDTSKLMKILQPQDVLALDSGAS  
LLHLAVEAGQEECAKLLNANPNLSNRRGSTPLHMAVERRVRGVVELLLARKISVNAKD  
EDQTALHFAAQNGDESSTRLLLEKNASVNEVDFEGRTPMHVACQHGQENIVRILLRRGVD  
VSLQGDALPLHYAAQGHLPVKKLLAKQPGVSVNAQTLDGRTPLHLAAQRGHYRVARILI  
DLCSDVNVCSLLAQTPHVAEAETGHTSTARLLLRGAGKEAMTSDGYTALHLAARNGHLA

TVKLLVEEKADVLRGPLNQ TALHLAAAHGHSEVVEELVSADVIDLDFDEQGLSALHLAAQ  
GRHAQTVETLLRHGAHINLQSLKFQGGHGAATLLRRSKT

>P60709

MDDDIAALVVDNGSGMCKAGFAGDDAPRAVFPSIVGRPRHQVMVGMGQKDSYVGDEAQS  
KRGILTLYPIEHGIVTNDMEKIHHTFYNELRVAPEEHPVLLTEAPLNPKANREKMTQI  
MFETFNTPAMYVAIQAVLSLYASGRTTGIVMDSGDGVTHTVPIYEGYALPHAILRLDLAG  
RDLTDYLMKILTERGYSFTTTAEREIVRDIKEKLCYVALDFEQEMATAASSSSLEKSYEL  
PDGQVITIGNERFRCPEALFQPSFLGMEISCIHETTFNSIMKCDVDIRKDLYANTVLSGG  
TTMYPGIADRMQKEITALAPSTMKIKIIAPPERKYSVIGGSILASLSTFQQMISKQEYDE  
SGPSIVHRKCF

>Q13464

MSTGDSFETRFKMDNLLRDPKSEVNSDCLLDGLDALVYDLDFPALRKNKNI DNFLSRYK  
DTINKIRDLRMAEDYEVVKVIGRGAFFGEVQLVRHKSTRKVYAMKLLSKFEMIKRSDSAF  
FEERDIMAFANSPVVQLFYAFQDDRYLYMVMEMPGGDLVNLMNSNYDVPEKARFYTAEVV  
LALDAIHSMGFIHRDVKPDNMLLDKSGHLKLADFGTCMKMNKEGMVRCDTAVGTPDYISP  
EVLKSQGGDGYGREGDSVGVFLYEMLVGDTPFYADSLVGTYSKIMNHKNSLTFPDDNDI  
SKEAKNLICAFSLTDREVRLGRNGVEEIKRHLFFKNDQAECLRDTVAPVVPDLSSDIDTSN  
FDDLEEDKGEETFPPIPKAFVGNQLPFVGFYYSNRRYLSSANPNDNRTSSNADKSLQES  
LQKTIYKLEEQHLNEMQLKDEMEQKCRTSNIKLDKIMKELDEEGNQRNLESTVVSQIEKE  
KMLLQHRINEYQRKAEQENKRRNVENEVSTLKDQLEDLKKVSQNSQLANEKLSQLQKQL  
EEANDLLRTESDTAVRLRKSHTMSKSI SQLES LNRELQERNRILENSKSQTDKDYQQLQ  
AILEAERRDRGHDSEMI GDLQARITSLQEEVKHLKHNLEKVEGERKEAQDMLNHSEKEKN  
NLEIDLNYKLSLQQRLEQEVNEHKVTKARLTDKHQSIEEAKSVAMCEMEKKLKEEREAR  
EKAENRVVQIEKQCSMLDVDLQSQKLEHLTGNKERMEDEVKNLTLQLEQESNKRLLLQ  
NELKTQAFEADNLKGLEKQMKQEINTLLEAKRLLFEFELAQLTKQYRGNEGQRELQDQLE  
AEQYFSTLYKTQVKELKEEIEEKNRENLKKIQELQNEKETLATQLDLAETKAESEQLARG  
LLEEQYFELTQESKKAASRNROEITDKDHTVSRLEEANSMLTKDIEILRRENEELTEKMK  
KAE EYKLEKEEEEISNLKAAFEKNINTERTLKTQAVNKLAEIMNRKDFKIDRKKANTQDL  
RKKEKENRKLQLELNQEREKFNQMVVKHQKELNDMQAQLVEECAHRNELQMQLASKESDI  
EQLRAKLLDLS DSTSVASFPSAETDGNLPESRIEGLSVPNRGNIKRYGKKQYVVVSSKK  
ILFYNDEQDKEQSNPSMVLDDIKLFHVRPVTQGDVYRAETEEIPKIFQILYANECECRKD  
VEMEPVQQAECTNFQNHKGHEFIPTLYHFPANCDAKPLHVFKPPPALCRRCHVKCHR  
DHLDKKEDLICPKVSYDVTSARDMLLLACSQDEQKQVTHLVKKIPKNPPSGFVRASPR  
LSTRSTANQSFRKVVKNTSGKTS

>Q15642

MDGTELDQFEVLERHTQGLDLLDRYVKFVKERTEVEQAYAKQLRSLVKKYLPKRPAKDDP  
ESKFSQQQS FVQILQEVNDFAGQRELVAENLSVRVCELELTKYSQEMKQERKMHFQEGERRA  
QQQLENGFKQLENSKRKFERDCREAEKAAQTAERLDQDINATKADVEKAKQQAHLRSHMA  
EESKNEYAAQLQRFNRDQAHFYFSQMPQIFDKLQDM DERRATRLGAGYGLLSEAELEVVP  
IIAKCLEGMKVAANAVDPKNDSHVLIELHKS GFARPGDVEFEDFSQPMNRAPSDSSLGTP  
SDGRPELRGPRSRTRKPFPGKKNKPRPPPLSPLGGPVPSALPNGPPSPRSGRDPLAILSE  
ISKSVKPRLASFRSLRGSRGTVVTEDFSHLPPEQQRKRLQQQLEERSRELQKEVDQREAL  
KKMKDVYEKTPQMGPASLEPQIAETLSNIERLKLEVQKYEALAEAESRVLSNRGDSLSR  
HARPPDPPASAPPDSSSNSASQDTKESSEEPPEESQDTPITYTEFDEDFEEPTSPIGHC

VAIYHFEGSSEGTISMAEGEDLSLMEEDKGDGTRVRRKEGEGYVPTSYLVRTLN  
>Q6ZTW0

MAAVEKRRQAVPPPAGFTDSGRQSVSRAAGAAESEEDFLRQVGVTEMLRAALLKVLEARP  
EEPIAFLAHYFENMGLRSPVNGGAGEPPGQQLLQQRLGRALHLRLAHHSQRAAFNNVNS  
VAYECLSAGGRRKRPGLDGRTYSELLRRICRDGQAPEEVVAPLLRQVCRDHEAVPLSVF  
RAGTLTCFVLLFVARAGALFQILLEDAAAADRRVQAVLDTLEGALQASDAAAPARFL  
EAGSRLGPDSLALALDRAVGGRRPSAPMTREEFLERAAALFIAKVKPVG

>Q8CJ53

MDGTELDQFEVLERHTQGLDLLDKYVKFVKERAQAYAKQLRSLVKKYLPKRPTKDDP  
EVKFSQQQSFVQLLQEVNDFAGQRELVAESLGRVLCLELAKYSQEMKQERKMHFQEGERRA  
QQQLENGFKQLENSKRKFERDCREAEKAAHTAERLDQDINATKADVEKAKQQAHLRNHMA  
EESKNEYAAQLQRFNRDQAHFYFSQMPQIFDKLQDMERRATRLGAGYGLLSEAEQVVP  
IIGKCLEGMKVAAESVDAKNDSQVLIELHKS GFARPGDLEFEDFSQVINRVPSDSSLGTP  
DGRPELRAASSRSRAKRPFGKKNKPRPPSLSLGGHLPSTLSDGPSSPRSGRDPLAILSE  
ISKSVKPRLASFRSFRGGRTVATEDFSHLPPEQQRKRLQQQLEERNRELQKEEDQREAL  
KKMKDVYEKTPQMGDPASLEPRIAETLGNIERLKLEVQKYEALAEAESRVLSNRGDSLRSR  
HARPPDPPTTAPPDSSSSSTNSGSQDNKESSEPPSEGQDTPIYTEFDEDFEEPASPIG  
QCVAIYHFEGSSEGTVSMSEGEDLSLMEEDKGDGTRVRRKQGAEGYVPTSYLVRTLN

>Q8N264

MEENNDSTENPQQGQRQNAIKCGLRKQGGFVKTHTRFVLKGDQLYYFKDEDETKPLGTI  
FLPGNKVSEHPCNEENPGKFLFEVVPGGDRDRMTANHESYLLMASTQNDMEDVKSIRRVI  
GPFGGGIFGQKLEDTVRYEKRYGNRLAPMLVEQCVDFIRQRLKEEGLFRLPGQANLVKE  
LQDAFDCGEKPSFDSNTDVHTVASLLKLYLRELPEVPIPYAKYEDFLSCAKLLSKEEEAG  
VKELAKQVKSLPVVNYNLLKYICRFLDEVQSYSGVNMKMSVQNLATVFGPNILRPKVEDPL  
TIMEGTVVVQQLMVMI SKHDCLFPKDAELQSKPQDGVSNNEIQKKATMGQLQNKENN  
TKDPSRQCSDKSESPQRSSMNGSPTALS GSKTNSPKNSVHKLDVSRSPPLMVKKNPAF  
NKGSGIVTNGSFSSSNAEGLEKTQTPNGSLQARRSSSLKVS GTKMGTHSVQNGTVRMGI  
LNSDTLGNPTNVRNMSLPNGYVTLRDNKQKEQAGELGQHNRLSTYDNVHQQFSMMNLDDK  
QSIDSATSTSSCEISLPENSNSCRSSTTTCPEQDFFGNFEDPVLDPGPPQDDLSHPRDYE  
SKSDHRSVGGRRSRATSSSDNSETFVGNSSSNHSALHSLVSSLKQEMTKQKIEYESRIKS  
LEQRNLTLETMMSLHDELQERKKFTMIEIKMRNAERAKEDA EKRNDMLQKEMEQQFFST  
FGELTVEPRRTERGNTIIQ

>Q96DB5

MALAAARLRLLPFRGAAPGSRLPAGTSGSRGHCGPCRFRGFEVMGNPGTFKRGLLLSALS  
YLGFEYQVISQA AVVHATAKVEEILEQADYLYESGETEKLYQLLTQYKESEDAELLRLA  
RASRDVAQLSRTSEEEKLLVYEALEYAKRALEKNESFASHKYAICLSDVGDYEGIKAK  
IANAYIIKEHFKAIELNPKDATSIHLMGICYTFAEMPYQRRIAKMLFATPPSSTYEKAL  
GYFHRAEQVDPNFYSKNLLLLGKTYLKLHNKLA AFLMKAKDYPAHTEEDKQIQTEAAQL  
LTSFSEKN

>Q96K30

MKTPVELAVSGMQTLGLQHRCRGGYRVKARTSYVDETLFGSPAGTRPTPPDFDPPVEKAN  
RTRGVGKEASKALGAKGSCETTPSRGSTPTLTPRKNKYRPI SHTPSYCDSESLFGSRSEG  
ASF GAPRMAKGDAAKLRALLTPPTPRGSHSPRPREAPLRAIHPAGPSKTEPGAADSQK  
LSMGLHSSRPLKRGLSHSLTHLNPSTGHPATSAPHTNGPQDLRPSTSGVTFRSPLVTS

RARSVSI SVPSTPRRGGATQKPKPPK

>Q96KG9

MFFARDPVRDFPFELIPEPPEGGLPGPALHRGRKKATGSPVSI FVYDVKPGAEEQTQVAK  
AAFKRFKTLRHPNILAYIDGLETEKCLHVVTEAVTPLGIYLKARVEAGGLKELEISGLHQ  
IVKALSFLVNDCSLIHNNVCMMAAVFVDRAGEKLGGLDYMYSAQGNNGGGPPRKGIPPELEQY  
DPPELADSSGRVVREKSADMRLGCLIEVFNGPLPRAAALRNPGKIPKTLVPHYCELVGAN  
PKVRPNPARFLQNCRAPGGFMSNRFVETNLFLEEIQIKEPAEKQKFFQELSKSLDAFPED  
FCRHKVLQPQLLTAFEFGNAGAVVLTPLFKVGKFLSAEEYQQKIIPVVVKMFSSTDRAMRI  
RLMQMEQFIQYLDEPTVNTQIFPHVVHGFVLDTNPAIREQTVKSMLLLAPKLNANLNVE  
LMKH FARLQAKDEQGPIRCNNTTVCLGKIGSYLSASTRHRVLTSAFSRATRDPFAPSRVAG  
VLGFAATHNLYSMNDCAQKILPVLCGLTVDPEKSVRDQAFKAIRSFLSKLESVSEDPTQL  
EEVEKDVHAASSPGMGAAASAGAVTGVSSLT SKLIRSHPTTAPTETNIPQRPTPEGVPA  
PAPTPVPATPTTSGHETQEEDKDTAEDSSTADRDEDEDGSLEQEAESVLAQQDDSTGGQVS  
RASQVSNSDHKSSKSPESDSSEAEGSEQGQEPSSQEPDPDTRLASEYNGGPESSDKGD  
FATLSARPSTQPRPDSGEDNEGLETD SRQVKAELARKKREERRREMEAKRAERKVAKGPM  
KLGARKLD

>Q9BQ89

MPVHTLSPGAPSAPALPCRLRTRVPGYLLRGPADGGARKPSAVERLEADKAKYVKS LHVA  
NTRQEPVQPLLSKQPLFSPETRRVLTSPRRALPGPCRRPQLDLIDLSSLDLDCSPVSP  
AEASRTPGRAEGAGRPPATPPRPPSTSAVRRVDVRPLPASPARPCPSGPAAASSPAR  
PPGLQRSKSDLSEFRSRAAADLERFFNFCGLDPEEARGLGVAHLARASSDIVSLAGPSAG  
PGSSEGGCSRSSVTVEERARERVPYGVSVVERNARVIKLYGLRQARES PAAEG

## (2) 30 cytoskeleton proteins

>Q08014

MSEAMVFSKID EYTLFMSRSLQKSLKTFAEQVMALIYQYKDTLVEDRLALTNTLDEAVQI  
LVDSGKEEADKLGFNIIYSAVSRYSI SEIASQSGQTTAAPPATDIDGLHRQLVALKNSLGQN  
AELYEQRCQLQAE LRELQEFSENPAAAVEEIMQLKAQIDELKYGASNHNALVQEKRDLE  
HLADLRLSRQDTNSRLPQEIDRLRAEIEDEKRNLPHMDDLQRQRDELQRQLDTIRRRGNT  
SGVMAEIE NIQRQIDDANSSASSEHELRLRAEVETLRAQKSIVTRLEAENADLRRELQD  
IRGRAQEMSASQRY SANQAQELQEKAMQAEELLOQKIELRRQLHEALERADAGEAALRDK  
RRLEDEIKGLQLRLTENDFTKERSILRNEIQAKTTEIDTLISDRRALETKLLNKEAEVDQ  
LLYEKQLLKT ELSYRGTNEDIDKLTFEKRQLVEELNDLREKTIKYDQLAREKAALETEL  
KENSYNFDQLLEQKQMRSDLNALREKAADYERVDRELRLKDK ELEEKNAEIERLLED RR  
VMRTELLHSKESATDVDSL IQEKRLRDRELAHLRDRMSEYERVVEERI QEKENLLKQR  
ITELEQQQRTATVRETEMSALREKANELDGYNRERQAREHEINMLRDKALES DKL RQDNR  
VMAMELTELREKVQLLEKLYEK RARDVEMLELRHKAMDVDTLVEEKQRLEMRLAELKIK  
VNNYDQLADDKARLQEQLKEMSDK LIEFEMIMDDNRRLKLQVKELDLKTANMEKLYEYK  
KLEDQLKATKAMTSTGMGVSAASPAFYKTKSMRLTQQNNQMKNTTDNLLTRDIPK LIDKL  
IERPAGTTT MGRSGKF

>P20305

LGALVVALCALSPPARAATASRGAPQARAPQGRVSPMRPSTMVVEHPEFLKAGKEPGLQI  
RVEKFDLVPVPPNLYGDFFTGDAYVILKTVQLRNGNLQYDLHYLGNECSQDESGAAAIFT  
VQLDDYLNGRAVQHREVQGFESATFLGYFKSGLKYKKGGVASGFKHVVPNEVAVQRLFQV



KGRRVVRATEVPVSESFNRGDCFILDLGNDIYQCGSNSNRYERLKATQVSKGIRDNERSG  
RAHVHVSEEDAEPAGMLQVLGPKPTLPEGTEDEVKEDAANRKLAKLYKVSNGAGTMTVSL  
VADENPFAQGALKSEDCFILDHGKDGKIFVKGKQANTEERKAALKTASDFISKMNYPKQT  
QVSVLPEGGETPLFKQFFKNRDPDQVDGPGLSYLSSHIANVERVPFDDAATLHTSTAMAAQ  
HGMDDDGTGQKQIRIEGSNKVPVDPATYGFYGGDSYIILYNYRHGGRQGQI IYNQGAQS  
TQDEVAASAILTAQLDEELGGTPVQSRVVQGKEPAHLMSLFGGKPMI IYRGGTSREGGQT  
APASTRLFQVRASSSGATRAVEVI PKAGALNSNDAFVLKTPSAAYLVGTGASEAEKTGAQ  
ELLRLVRAQPVQVAEGSEPDSEALGGKAAAYRTSPRLKDKKMDAHPRLFACSNKIGRFV  
VEEVPGELMQEDLATDDVMLLDTDQVFVVGKDSQEEEEKTEALTSAKRYIETDPANRDRRT  
PINVVKQGFEPSPFVGFGLGDDNYSVDPLDRAIAELAA

>P13020

MAPYRSSLLCALLLLALCALSPSHAATTSRGRAQERAPQSRVSEARPSTMVVEHPEFLKA  
GKEPGLQIRVEKFDLVPVPPNLYGDDFTGDAYVILKTVQLRNGNLQYDLHYLGNECSQDE  
SGAAAI FTVQLDDYLNGRAVQHREVQGFESSTFSGYFKSGLKYKKGGVASGFKHVVPNEV  
VVQRLFQVKGRRVVRATEVPVSDSFNNGDCFILDLGNNIYQCGSGSNKFERLKATQVSKG  
IRDNERSGRAQVHVSEEGGEPEAMLQVLGPKPALPEGTEDEVKEDAANRRLAKLYKVSNG  
AGSMSVSLVADENPFAQALRSEDCFILDHGRDGKIFVKGKQANMEERKAALKTASDFIS  
KMQYPRQTQVSVLPEGGETPLFKQFFKNRDPDQTDGPGGLGYLSSHIANVERVPFDDAATLH  
TSTAMAAQHGMDDDDGTGQKQIRIEGSNKVPVDPATYGFYGGDSYIILYNYRHGGRQGQI  
IYNQGAQSTQDEVAASAILTAQLDEELGGTPVQSRVVQGKEPAHLMSLFGGKPMI IYKGG  
TSRDGGQTAPASIRLFQVRASSSGATRAVEVMPKSGALNSNDAFVLKTPSAAYLVGAGAS  
EAEKTGAQELLKVLRSQHVQVEEGSEPDAFEALGGKTAYRTSPRLKDKKMDAHPRLFAC  
SNRIGRFVIEEVPGELMQEDLATDDVMLLDTDQVFVVGKDSQEEEEKTEALTSAKRYIETD  
PANRDRRTPI TVVRQGFEPSPFVGFGLGDDNYSVDPLDRALAEELAA

>O61270

MTTELEIQKAGKETGIQIRIEDFELVPVPKTNHGKFYTGDSYIILKTTALESGRGFENLH  
YQKLESSQDERGAVAILAVKMDDDLNGGVPVEHREVQGNESAFAFKGLFPTITYLIGGVASG  
FTHVEINEVEDRKVLTRVKGKRPVRATQVP IKTSLTSDSYVFDIGKEIYVSGPKASHFE  
KNKAIQYADGLKNERQGRAELHHIDSLDDKESRTMLKDFFGAEAFPGSIPSGESDTVQQVG  
TTIKLFRISDDSGTLKITLVSENSPFNQGDLSGDTFVLANARTNHIFVKGKDSRTERA  
SAANPDNSFFNKIEMPLTSKLTVLPEGGETANFKSLFTNKSSRDQRGLGQVHSINKTAKV  
AKETFDA SVLHSNPKKAAESKMIDDGSGKTQIRVASLRKEPVPKELYGQFYGGDCYIIMY  
TPQRGANVLYYQGNKASINERTALPIQTKNTHETECDGNASQIRVVQGTPEPPHMMMLFGG  
KPLIVHLGDTISPTGKSKAASTRLYQVQSFFAGRCRAVEVPAKSSHLNSNDAFLLITPSG  
SYIVGKGAVESEIQGAKDTAGILKISKYEIINENQEPNEFTALGGQSDYRDEREEGVPVE  
PRLFEMSNATGNFIAEEINSNYVQSDLNPD SIMMLDANYIYVIGKEANQEEKMSFKSLVD  
NYVKTGDSGRSKDI PREVFQDQKEPLSFTGHFLGDKTLD

>Q27319

MVPAFEGAGAVEGLTIRIENFEVVPYPKEKYGQFYQGDSYIVLYTRDVNGNLSDLHFLGS  
ETSQDEAGTAAIKTVELDDQLGGVPVQHREVEGHETSFLFSRFKKGVRYLGGVASGFHH  
VDPDAPYPARLFHVKGRRNIRIRQVEVGVGSMNKGDCFILDGCSQVYAYMGPSSRKMDRL  
KAIQAANPVRADDHAGKAKVIVIDETASGSEAGESSPGLGGGSPDDVADEDTGVDDSAFE  
RSEVNVVTLHHIFEDGDGVIQTNMIGEKPLLQSMLDGDCFLLDTGVG VYVIGSGSSKKE  
KVKSMELAAGYMEKKGYPTYTNVQRVVEKAEPVFKAYFKTREPQEQIGLGRVFTQRQMS

AVSATETDFDVSSLHAEKRRLQKNAGPAFALCPIMVLARRNLGPLRRTLKLEPVDESTHG  
FFFGGDSYVLKYIYEVNGNERYIILYFQGCASSQDEKASSAIHTVRLDNELCGKAVQVRVV  
QGYEPAHFLRIFKGRMVIIFLGKASGFKNVHDHDTYDVDGTRLFRVVRTCDFDTRAIQQT  
EVAGSLNSDDVFVLETPGKTYLIGKGASEEEKAMGEKVVVELVSPGRDMVTVAEGEEDDDF  
GGLGGKGDYQTARDLDRPLLYPRLFHCTISPAGCLRVNEMSDFAQEDLNEDDVMVLDSDG  
EVYVVGQGSDDQEKEKAFTMAENYIKTDP TERTLDATVILRINQGEPAAFSTSIIFPANPD  
MQKGLVSYDDMKAQVPETNAAVE

>Q28372

MVVEHPEFLKAGKEPGLQIRVEKFDLVPVPPNLYGDFFTGDAYVILKTVQLRNGILQYDL  
HYLGNESQDESAAAAIFTVQLDDYLNGRAVQHREVQGFESATFLGYFKSGLKYKKGVA  
SGFKHVVPNEVVVQRLQVKGRVVRATEVPVSESFNNGDCFILDGNNIYQCGSKSNRF  
ERLKATQVSKGIRDNERSGRAQVSVFEEGAEPEAMLQVLGPKPTLPEATEDTVKEDAANR  
KLAKLYKVSNGAGPMVSLVADENPFAQGALRSEDCFILDHGKDGKIFVKGKQANMEERK  
AALKTASDFISKMDYPKQTQVSVLPEGGETPLFRQFFKNRDPDQTEGLGLAYLSSHIAHV  
ERVPFDAATLHTSTAMAAQHGMDDGTGQKQIRVEGSNKVPVDPATYQGQFYGGDSYIILY  
NYRHGSRQGOIINQGAQSTQDEVAASAILTAQLDEELGGTPVQSRVVQGKEPAHLMSLF  
GGKPMIVYKGGTSREGGQTAPASTRLFQVRASSGATRAVEIIPKAGALNSNDAFVLKTP  
SAAYLVGAGASEAEKTGAQELLRVLRAQPVQVAEGSEPDSEALGGKATYRTSPRLKDKK  
MDAHPRLFACSNKIGRFVIEEVPGEFMQEDLATDDVMLLDTDQVFVVGKDSQDEEKTEA  
LTSAKRYIDTDPAHRDRRTPIITVVKQGFEPSPFVGFGLGDDSYSDPLDRALAEAA

>Q76LL6

MATLACRVQFLDDTDPFNSTNFPEPSRPPLFTFREDLALGTQLAGVHRLLRAPHKLDDCT  
LQLSHNGAYLDLEATLAEQRDELEGFQDDTGRGKNSIILRTQLSVRVHACIEKLYNSSG  
RDLRRALFSLKQIFQDDKDLVHEFVIAEGLTCLIKVGAEADQNYQNYILRALGQIMLYVD  
GMNGVINHSETIQLYTLVGSKFRLVVKTALKLLLVFVEYSESNAPLLIQAVSAVDTKRGV  
KPSNIMEILEEKDGVDELLVYAMTLVNKTLAGLPDQDTFYDVVDCLEELGIAAVSQRHL  
NKKGTDLDLLEQFNIYEVALRHEDGDETAEPSPSGHRDRRRASMCSSGGTVGEQQGLDRRR  
SRRHSIQNIKSPLSAPTSPCSPSPVPAFKPSQVRDLCEKDEEEEEEEEEQPIITEPNSEEEERE  
DDAQCGKDSKASSASGQSSPGKDAAPESSALHTTSSPTSQGRLSASTAARSPVLGGTSG  
PEASRPAARLLPPSPGLATRPSTAPKVSPTIDKLPYVPHSPFHLFSYDFEDSPLLTCKDKG  
GDSQTENRYSNFSNSFQSSRPSPGPSGSPSYASSFSSPQDTRSSPSGLLTSSFRQHQES  
LAAERERRRQEREERLQRIEREERNKFNREYLDKREEQRQARGERYKYLEQLAAETQEKE  
PRSQSVSRGRADLSLDLSLPAAPAPPSPSSQSPSADSQEALPVPSSPPTLQCPQVSGKDH  
EPELEAEAGQGADEASQDIASAHGAESQEEPVLELEPEERASLSEKERQNEEVNERDNC  
SASSISSSSTLEREEKEDKLSEDRATGLSTSLQDVGVNGQCGDILTSCRFLMDMLYAHN  
RKSTEEDEEKDDGEPGRSAQEVEAVASLATRISTLQANSQAPEESIKRVDIGCLDNRGSVK  
AFAEKFNSEVGRGAIISPDESQDKVPDTPPAQLKTESDYIDQLMANPRELRIQDMDFTD  
LGEEDDIDVLDVLDLGHREAPGPPPPPPPTFLGLPPPPPPPLLDVPPPPVPGNLLASPVF  
NTPQGLGSQVPRGQPAFTKKKKTIIRLFNEVRPFEPKNNRRCREFLSKLEPIKVDTSRLE  
HLFESKSKELSVTKKTAADGKRQEIIIVLDSKRSNAINIGLTVLPPPTIKIAILNFDEYA  
LNKEGIEKILTMIPTEEEKQKIQEAQLANPEVPLGSAEQFLTLTSSISELSARLHLAFKM  
DYETTEKEVAEPLLDLKEGIDQLENNKTLGFILSTLLAIGNFLNGTNAKAFELSYLEKVP  
EVKDTVHKQSLHHVCTMVVENFPDSSDLYSEIGAITRSKAVDFDQLQDNLCQMERCKA  
SDHLKAIKHEMKPVLKQRMSEFLKDCAERIIILKIVHRRRIINRFHSSFLFMGHPYAIR

EVNINKFCRI ISEFALEYRTTRERVLQKQKCRANHRERNKTRGKMITDSGKFSGSSPAAP  
SQPQGLSYAEDAAEHENMKAVLKTSSPALEDATPVLGVRTRSRASRGSTSSTMGTEESPS  
VTDDAADEIMDRIVKSATQVPSQRVVPRERKRSRANRKS LRRTLKSGLTPEEARALGLVG  
TSELQL

>Q9JJV2

MAGQSYVDNLMCDGCCQEAAIVGYCDAKYVAATAGGVFQSITPVEIDMIVGKDREGFFTN  
GLTLGAKKCSVIRDSLYVDGDCTMDIRTKSQGGEPTYNVAVGRAGRVLV FVMGKEGVHGG  
GLNKKAYSMAYLRDSGF

>Q09430

MAGQSYVDNLMCDGCCQEAAIVGYCDAKYVAATAGGVFQSITPVEIDMIVGKDREGFFTN  
GLTLGAKKCSVIRDSLYVDGDCTMDIRTKSQGGEPTYNVAVGRAGRVLV FVMGKEGVHGG  
GLNKKAYSMAYLRDSGF

>P62963

MAGNAYIDSLMADGTCQDAAIVGYKDSVSAAVPGKTFVSIPTAEVGVLVGKDRSSFFVN  
GLTLGGQKCSVIRDSLLQDGEFTMDLRKSTGGAPTFNVTVTMTAKTLVLLMGKEGVHGG  
LINKKCYEMASHLRRSQY

>Q26768

MLCPPDVAFEKRHFRRDGNKVPPSIALVAGLESGFLFKLSAVEDVARRGQFPGLLTED  
GFLLMCEESEHIRDAYAMAKHLVALAPDGI FTRATLQEAAGKVGSTQDTLSVEEVDALFN  
ALDSNDRGYVSVDEFMDALYGEEGREAMREIRREYMRRKIEVEGEP SRMRPTPKPTRKLR  
QKRKREQGQKRKQGRQKQEQGQRQKREQGQRQKQEQGQKRKRERGGARPPPPKQKAGC  
GC

>O13728

MQANQQSVQNRFTFKFNTKLSSRDLPVFDLRKDLSDGILLIQLLEIIGDENLGRYNRNP  
RMRVHRLNENKALEYIKSKGMPLTNIGPADIVDGNLKLILGLITLILRFTIADINEEGL  
TAKEGLLLCQRKTANYHPEVDVQDFTRSTNGLAFCALIHQHRPDL LDYNKLDKKNHRANM  
QLAFDIAQKSIGIPRLIEVEDVCDVDRPDERSIMTYVAEYFHAFSTLDKVETAARRVERF  
TEVLMSTHDMKIDYESRMKRLLSIARMQYHTVQFENNYTDVKSHSNNAFKFKATEKRE  
VKEKIDLESLLGTIQTNLKTYQLRKYEP PAGLKIVDLERQKDFLSEEANQSKLINTHMRE  
IKESMRIAFAADRANSFSKMLSTISNEITNLQGDRDQLDHVEFLQEHLGPLEVELASVKVL  
YDNCFQAGIEENDYTMFSYEDLEHEFGITANI IANKIKYLENELLEREKRTLKQELDGI  
TKVFRHFEEKKSNMLNEVEFYAALASLGLVYDTEEGTALFHRAANSEEGVTYERFTEIVM  
EELED RDSARQVLYAFCDVADGKS YVTSDDLRSQVRPNIVKFLECNMKNHSEGLDYLT I  
KQLLAEDKEIV

>Q94053

MAQSVPPGDIQTQPGTKIVFNAPYDDKHTYHIKVINSSARRIGYGIKT TNMKRLGVDPPC  
GVLDPKAEVLLAVSCDAFAFGQEDTNNDRIT IETNTPDGAAKQFRREFQGDGMVRRKNLP  
IEYNP

>Q9TVW5

MAQSVPPGDIQTQPGTKIVFNAPYDDKHTYHIKVINSSARRIGYGIKT TNMKRLGVDPPC  
GVLDPKAEVLLAVSCDAFAFGQEDTNNDRIT VETNTPDGAAKQFRREFQGDGMARRKNLP  
IEYNP

>Q21244

MAQSVPPGDIQTQPGTKIVFNAPYDDKHTYRIKVINSSARRIGYGIKT TNMKRLGVDPPC

GVLDPKEAVLLAVSCDAFAFGQEDTNNDRI TVETNTPDGAAKQFRREFQGDGMVRRKNLP  
IEYNP

>Q17856

MAQSVPPGDIQTQPGTKIVFNAPYDDKHTYHIKVINSSARRIVYGIKTTNMKRLGVDPPC  
GVLDPKEAVLLAVSCDAFAFGQEDTNNDRI TVETNTPDGAAKQFRREFQGDGMVRRKNLP  
IEYNP

>Q18461

MAQSVPPGDIQTQPGTKIVFNAPYDDKHTYHIKVINSSARRIGYGIKTTNMKRLGVDPPC  
GVLDPKEAVLLAVSCDAFAFGQEDTNNDRI TVETNTPDGAAKQFRREFQGDGMVRRKNLP  
IEYNP

>Q19832

MAQSVPPGDIQTQPGTKIVFNAPYDDKHTYHIKVINSSARRIGYGIKTTNMKRLGVDPPC  
GVLDPKEAVLLAVSCDAFAFGQEDTNNDRI TVETNTPDGAAKQFRREFQGDGMVRRKNLP  
IEYNP

>P53020

MAQSVPPGDIQTQPGTKIVFNAPYDDKHTDHIKVINSSARRIGYGIKTTNMKRLGVDPPC  
GVFDPKEAVLLAVSCDAFAFGQEDTNNDRI TVETNTPDGAAKQFRREFQGDGMVRRKNLP  
IEYNP

>P53019

MAQSVPPGDIQTQPGTKIVFNAPYDDKHTYHIKVINSSARRIGYGIKTTNMKRLGVDPPC  
GVLDPKEAVFLAVSCDAFAFGQEDTNNDRI TVETNTPDGAAKQFRREFQGDGMVRRKNLP  
IEYNP

>P53018

MPNAECRHNAGFSAAYAEMPI SKFTAYAENAVLPKRKMDGISAYADMPKKIFGGICRYAV  
MPKNSECRGTMIQTQPGTKIVFNAPYDDKHTYHIKVINSSARRIGYGIKTTNMKRLGVDP  
PCGVLDPKEAVLLAVSCDAFAFGQEDTNNDRI TVETNTPDGAAKQFRREFQGDGMVRRKN  
LPIEYNP

>P13263

MAQSVPPGDIHTQPGSKIVFNAPYDDKHTYHIKITNAGGRRIGAIKTTNMKRLGVDPPCG  
VLDPKENVLMVSCDTF DATREDINNDRIT IETNTPDGAAKQFRREFQGDGMVRRKNLPI  
EYNL

>P27440

MAQSVPPGDINTQPGSKIVFNAPYDDKHTYHIKITNAGGRRIGAIKTTNMRLGVDPPCG  
VLDPKESVLMVSCDTFNAATEDLNNDRIT IETNTPDGAAKQFRREFQGDGMVRRKNLPI  
EYNL

>P13262

MAQSVPPGDIHTQPGSKIVFNAPYDDKHTYHINITNAGGRRIGAIKTTNMKRLGVDPPCG  
VLDPKENVLMVSCDTF DATREDINNDRIT IETNTPDGAAKQFRREFQGDGMVRRKNLPI  
EYNL

>P27439

MAQSVPPGDINTQPSQKIVFNAPYDDKHTYHIKITNAGGRRIGAIKTTNMRRLSVDPPCG  
VLDPKEKVLMAVSCDTFNAATEDLNNDRIT IETNTPDGAAKQFRREFQGDGMVRRKNLPI  
EYNL

>P53017

MAQSVPPGDIQTQPGTKIVFNAPYDDKHTYHIKVINSSARRIGYGIKTTNMKRLGVDPPC  
GVLDPKEAVLLAVSCDAFAFGQEDTNNDRI TVETNTPDGAAKQFRREFQGDGMVRRKNLP  
IEYNP

>P05634

MAQSVPPGDIQTQPNKIVFNAPYDDKHTYHIKVINSSARRIGYGIKTTNMKRLGVDPPC  
GVLDPKEAVLLAVSCDAFAFGQEDTNNDRI TVETNTPDGAAKQFRREFQGDGMVRRKNLP  
IEYNP

>Q23519

MTQSVPPGDIQTQPGTKIVFNAPYDDKHTYHIKVINSSARRIGYGIKTTNMKRLGVDPPC  
GVLDPKEAVLLAVSCDAFAFGQEDTNNDRI TVETNTPDGAAKQFRREFQGDGMVRRKNLP  
IEYNP

>Q6AYD6

MALTVNVVGPAPGFRI SGG RDFHTPI IVTKVTERGKAEAADLRPGDI IVAINGESAESML  
HAEAQSKIRQSASPLRLQLDRSQTASPGQINGEGSLDMLATRFQGSRLRTHHNSQSSQRSA  
CFSPASLSRPDPSPFSTPPPTSPIALSGENVIGCSFQSLTHSPGLAATHHLTPGQPTSQ  
QAGHSSPSDSTVRVLLHSPGRPSSPRLSSLDLEEDSEVFKMLQENRQGRAAPRQSSSFRL  
LQEALEAEERGGTPAFVPSLSPKASLPTSRALATPPKLHTCEKCSVNI SNQAVRIQEGR  
YRHPGCYTCADCGLNLKMRGHFVGNELYCEKHARQRY SMPGTLSSQA

>Q8R1G6

MALTVDVAGPAPGFRI SGG RDFHTPI IVTKVTERGKAEAADLRPGDI IVAINGQSAENML  
HAEAQSKIRQSASPLRLQLDRSQTASPGQTNGEGSLEVLATRFQGSRLRTHRDSQSSQRSA  
CFSPVLSLSPRPCSPFSTPPPTSPVALSKEDMIGCSFQSLTHSPGLAAAHHLTPGHPTSQ  
QAGHSSPSDSAVRVLLHSPGRPSSPRFSSLDLEEDSEVFKMLQENRQGRAAPRQSSSFRL  
LQEALEAEERGGTPAFVPSLSSQASLPTSRALATPPKLHTCEKCSVNI SNQAVRIQEGR  
YRHPGCYTCADCGLNLKMRGHFVGNELYCEKHARQRY SMPGTLNSRA

### (3) 30 endoplasmic reticulum proteins

>O08601

MILLAVLFLCFFSSYSASVKGHTTGLSLNNERLYKLTYSTEVFLDGGKGPQDSVGYKIS  
SDVDVLLRNP DGGDDQVIQVTITAVNVENAGQQRGEKSIFQ GKSTPKI IGKDNLEALQR  
PMLLHLVRGKVKEFYSYENEPVGIENLKRGLASLFQMQLSSGTTNEVDISGCKVITYQAQ  
QDKVVKIKALDTCKIERSGFTTANQVLGVSSKATSVTTYKIEDSFVTAVLAEETRAFALN  
FQQT IAGKIVSKQKLELKTTEAGPRMIPGKQVAGVIKAVDSKYKAIP IVGQVLERVCKGC  
PSLAEHKSIRKNLEPENLSKAEAVQSFLAFIQHLRTSRREEILQILKAEKKEVLPQLVDA  
V TSAQT PDSLEAILDFLDFKSDSSII LQERFLYACGFATHPDEELLRALLSKFKGSFASN  
DIRE SVMII I GALVRKLCQNEGCKLKAVVEAKKLILGGLEKPEKKEDTTMYLLALKNALL  
PEGIPLLLKYAEAGEGPVSHLATTVLQRYDVSFITDEVKKT LNRIYHQNRKVHEKTVRTT  
AAAVILKNPSYMDVKNILLSIGELPKEMNKYMLTVVQDILHFEMPASKMIRRVLKEMAVH  
NYDRFSKSGSSSAYTGYVERS PRAASTYSLDILYSGS GILRRSNLNI FQYIGKAE LHGSQ  
VVIEAQGLEGLIAATPDEGEENLDSYAGMSAILFDVQLRPVTF FNGYS DLMSKMLSASGD  
PVS VVKGLILLIDHSQDIQLQSG LKANMEIQGGLAIDISGSMEFSLYRESKTRVKNRVAV  
VITSDVTVDAS FVKAGVESRAETEAGLEFISTVQFSQY PFLVCMQMDKAEAPLRQFETKY  
ERLSTGRGYVSRRRKESLVAGCELPLHQENSEMCNVVFPQPESDNSSGGF

>O11982

MEKLADLNNTLGVITLLNDTLHNI LEEP GMVYFPYVASALTVLFTMHKASLPAMK LAMRT  
SQCSYRI IKRVVVT LINTLLRLGGYNDYLT DKDETEKQ INRVVKELRQQLTMIEKLT TRE  
IEQV ELLKRIYDMMVVRHDREIDMSKETNQKAFNTLHDGND RNYDDNTDVIAPL  
>O12674

MDKLADLNNTLSVITSMNDTLHSI IEDPGMAYFPYIASVLT VLFALHKAS IPTMKIALKT  
SKCSYKVIKYCIVTI INTLLKLVGYKEQVTTKDEIEQQMDRIVKEMRRQLEMIDKLT TRE  
IEQV ELLKRIHDNLITRPVDVIDMSKEFNQKNIKTLDEESRKNPYEPSEVTASM  
>O35949

MDTSMNFSRGLKMDLMQPYDFETFQDLRPFLEEYVSSFLIVVVYLLLIVVGQTYMRTRKS  
FSLQRPLILSFFLAIF SILGTLRMKFMATVMFTVGLKQTVCF AIYTD DAVVRFSFLFLLS  
KVVELGDTAFI I LRKRPLIFVHYHHSTVLLFTSFGYKNKVP SGGFMTMNFVHSMVMTYY  
TMKAAKLKHPNLLPMVITSLQI LQMVLTGIFGILNYIRQEKGCHTTTEHFFSFMLYGT YF  
ILFAHFFH RAYLRPKGKVASKSQ  
>O42707

MKFCSLFHVLSFCCTLAYAVPKSQFLQLHSLSNAI PVEKYGSVDEDSGYVYLT SKDSNEA  
RSGSLSTS VLRQVGQLSTS FVAHVSENENTFFAIYTS AVGSEGPVFGASDKDGLLISQEI  
DQTGKI FVRGYLNDKSFELAQFTDPDLP PFAKCTIESSPEALNNI I LKYGDQSGLEL FVN  
DKPCFQVKDVILPQGYFVGVSSQSTS AKDLVALSNLNI LPPDTSNNENLNPTSNTKQSVG  
DNTSPQTVIDTEGLNAIKADLAKL FNLVESQRQKMDSLHFALTNALERLNDI SSTSQFPS  
ERFNALEKLLHDSLSAQSS TADGTSKHLAEFEKEIKKAMGNAYS PYNLTNFMVFLLLGAI  
VSYGIMLVRRDRRRHKYL  
>O54998

MNLLFRLAVFLSLCCSDAQGQTKEESTEEVKIEVLRHPENCSKTSRKGDLLNAHYDGYLA  
KDGSKFYCSRTQDEGHPKFV LGGVGHVIKGLDIAMMDMCPG EKRVII PPSFAYGKEGYAE  
GKI PPNATLMFEI ELYAVTKGPRSIETFQKIDTDNDRQLSKAEI ELYLQKDFEKDANPRD  
KSYQKAVLEDIFKKN DHNGDGFISPKEYNVHQHDEL  
>O56850

MEKLTDLNNTLSVITLMNDTLHTIMEDPGMAYFPYIASVLT VLTFLHKAS IPTMKIALRT  
SRCSYKVIKYCIVSIFNTLLKLAGYKEQITTKDEIEKQMDRIVKEMRRQLEMIDKLT TRE  
IEQV ELLKRIHDMLI IKPVDKIDMSQEFNQRFKTLNEAEGENPYEPKEVTASL  
>O59833

MSILNVIRSHHDVEPQNV EEEPPLTGQTI VTE DKLETS AKDKKHESPSMS EDEEGSVENV  
DADLTKALMSIDPNHPAHPKPLK KLFVATVYTFLEVYVISSTACINFFDIYQTNHCSIQ  
VSYLVQSLFIVGN AFGPMLLGPMSDIFGRKVYVGS LILYIIFQIPQALAYNLPMMAINSA  
IAGAFGSSALANVASSMCDIFTPETVGFGISL FVGANAGASIGSPIGEALYDHRFYMNMI  
VGGFFVILCVLCPETLPVINIMNYSSTTGEKTVQVSTLAKAKSAVVRTKFV LSTAFKLLC  
TEPIIMALGLYNGFAYGLIFLYLDGLFPVFDNYKMGYMGANLTYLNFVGVTVIVVMLQP  
IQNLYRDKRRHGGVARPEARFLISLLTVFFPAGLFFAFTSDGRISVSPLIAGGVLGVGDP  
QLLAMINYITDSYPSVAGSAIAAFTLPSFAIAAVLVHLGIIMFDNMTTTAMATLAFISLS  
LVATIYVIYFFGHLIRKHSRLAVTQQALQE AHDAKVLPEV  
>O60568

MTSSGPGPRFLLLLPLLLPPAASASDRPRGRDPVNPEKLLVITVATAETEGYLRFLRS AE  
FFNYTVRTLGLGEERGGDVARTVGGGQKVRLLKEMEKYADREDMIIMFVDSYDVILAGSP  
TELLKKFVQSGSRLLSAESFCPEGLAEQYPEVGTGKRFLNSGGFIFGATTIHQIVRQKY

KDDDDDDQLFYTRLYLDPGLREKLSLNLNDHKSRI FQNLNGALDEVVLKFDRNRVRI RNVAY  
DTLP I VVHNGNPTK LQLNYLGNYPNGTPEGGCGFCNQDRRTLPGGQPPPRVFLAVFVEQ  
PTPFLPRFLQRLLLLDYPPDRVTLFLHNNEVFHEPHIADSPQLQDHFSAVKLVGPEEALS  
PGEARDMAMDLCRQDPECEFYFSLDADAVLTNLQTLRILIEENRKVIAPMLSRHGKLSNF  
GALSPDEYYARSEDYVELVQRKRVG VNPYISQAYVIRGDTLRMELPQRDVFSGSDTDPD  
MAFCKSFRDKGIFLHLSNQHEFGRL LATSRYDTEHLHPDLQIFDNPVDKEQYIHENYSRA  
LEGEGIVEQPCPDVYFPLLSEQMCDELVAEMEHYGQSGGRHEDSRLAGGYENVPTVDIHM  
KQVGIEDQLQLLRITYVGPMTESLFPGYHTKARAVMNFVVRYPDEQPSLRPHHDSSTFTL  
NVALNHKGLDYEGGCRFLRYDCVISSPRKGALLHPGRLTHYHEGLPTTGTRYIMVSFVD  
P

>O77588

MRLLLLLLAPLGLLLAETKGDAPEDNLLVLT VATKETEGFRRFKRSAQFFNYKI QALGLG  
EDPGEAMLAGGGLKVRL LKKALEKHADKENLVILFTDSYDVVFASGPRELLKKFRQARSQ  
VVFSAEELIYPDRRLEAKYPVVS DGRKFLGSGGFIGYAPNLSKLVAEEGQSDSDQLFYT  
KIFLDPEKREQINITLDHRCRIFQNL D GALDEVVLKFEMGQVRARNLAYDTLPVLIHNG  
PTKLQLNYLGNYPRTFETGCAVCDEGLRSLKIGIDEALPAVLVGVFIEQPTPFLSLFF  
QRLRLHYPQKRLRFIHNHEQHKAQVEQFLAEHGDEYQSVKLVGPEVRVANADARNMG  
ADLCRQDRGCTYYFSVDADVALTEPKTLRLLIEQNK NVIAPLMTRHGRLSNFGALSADGY  
YARSEDYVDIVQGRRVGVNVPYISNIYLIKGSALRAELQETDLFHHSKLDPDMAFCANIR  
QQDVF MFLTNRHSFGHLLSLDSYQTTHLHNDLEVF SNPEDKEKYIHENYTKALAGKMVEM  
PCPDVYFPIFTETACDELVEEMEHYGQSLGDNKDNRIQGGYENVPTIDIHMNQINFEREH  
KFLVEYIAPMTEKLYPGYYTRAQFDLAFVVRYPDEQPSLVP HHDASTFTINIALNRVGV  
DYEGGCRFLRYNCSIRAPRKGTLMHPGRLTHYHEGLPTTKGTRYIAVVSFVDP

>O92374

MDKLADLNYT LSVITL MNDTLHSI IQDPGMAYFPYIASVLT VLF TLHKASIP TMKIALKT  
SKCSYKVIKCCIVTIINTLLKLAGYKEQVTTKDEIEQQMDRI IKEMRRQLEMIDKLT TRE  
IEQVELLKRIHDNLI IKPVDVIDMSKEFNQKNIKTLDEESGKNPYE PLEV TASM

>O94401

MFFSVKNVFL LGIFGFVLGALAE TSHLERLSLEAPYINHGM RNLEYGGSTVIDRKNGI FL  
TQDVQNQQGISTR LPTPSSSEVLFQFRINSESTSLFGDGLAFFLAAERAKPGPVFGFTD  
KFNQYGFIFIDTYNNHRPGTLFPRVIVMKGDGHTPYDYENDGKANEIASCSALNVRGNDYN  
LGKLYDKNAKLRFEIAYQSSSFIKCFDLNEVELPLTTFMSFSAHTGDLSESHEIASI  
LSRTITDIDDEGTPEI PAEELKGTTYGQKKG SFKKRLI ILLLSLIVIFSI FALRSYQVQQ  
EKNRRTTVL

>O94491

MSSISIDEK LKDPESVQNKEILDVDVGDLS PKGVDAAFNYALDV DYDEIDPETERRLVRK  
IDCTIFPVMCLVYCIQFLDKTSNSYAVIMGLKEDLKMEGQMYSSGTAFYLG YLVFEFPAS  
LLLQRFPLSKTLCVFLVIGFLLCMTSVANYPGFIALRVLLGMMESAASPGFILLTAQYKR  
SEQQLRTSVVAFNGLGQILGSCMAYGLAKRTSLPMRGKLI F IICGVLAIFLGFVILAVVP  
DNPFKAFLTEEDRKL VVKRLRANKQGVGNHFKLYQFKETMLDIRTIMFVSSVLLNIPNG  
GIGTFSSLLIKGTMGYDTLQTL MGLPAGACEFGGLIAFGFLSLFIHKRMVLATITTCIA  
LIGSCLLSFAGPPRAQLAGYYLLMVSPGAMIVMFAI ISSNASGYTKKVTGVVIYLI GYCV  
GNLIGPQTFKAADAPEYMPAKNTMVG CYAATLVTFPALYV NRENKR RDQLAAEGKIEHR  
PNAEFEDLTD FENLDFRYTL

>P07308

MPAHMLQEISSSYTTTTTITEPPSGNLQNGREKMKKVPPLYLEEDIRPEMREDIHDPYQD  
EEGPPPKLEYVRNIILMALLHVGALYGITLIPSSKVYTLGIFYYLISALGITAGAHRLS  
HRTYKARLPLRIFLI IANTMAFQNDVYEARDHRAHKKFSETHADPHNSRRGFFFSHVGLL  
VRKHPAVKEKGGKLDMSDLKAEKLVMFQRRYYKPGLLLMCFILPTLVPYCGETFLHSLFV  
STFLRYTLVLNATLVNSAAHLYGYRPHYDKNIQSRENILVSLGAVGEGFHNYHHAFFPYDYS  
ASEYRHINFTTTTFFIDCMAALGLAYDRKKVSKAAVLARIKRTGDGSHKSS

>P12244

MLRALCALARVARVGADAEEQDNVLVAKKSNFLEPLAAHSYLAVEFYAPLCGHCKALAPD  
YAKAGGKKAEGSEIKAAKVEATEESDLAQQYGVRAYPTIKFFKNGDTASPKKEYTAGREA  
DDIVNLKKRTGPAATTLSDTAAAESLVDSSSEITVIIGFFKDPGSDSARQFLLAADAVDDV  
PFGINSNSDVYSKYQMDKDAVVLFFKFAEGRNNFEGETKEKLLDFIKHNNLPLVIEFTE  
QTAPKIFGGEIKTHILLFLPKSVSDYDGKLSNLKKAADGFKGKILFVVIDSDHTDNQRIL  
EFFGLKKEECPAVRLITLDEELTKYKPETEELTAEKLTQFCHHFLEGKIKPHLMSNEPLP  
EDDKQPVKVLVGKNYEEVAFDEKKNVFIIEFYAPCGHCKQLAPMDRLGEAYKDDENIVIAK  
MESTANEVEAIKVHSFPTLKFPPASAERTVIDYNGERTLDGYKKFLESQDGYGNDDDD  
DLEEALES DMEEDEDQKAMKDEL

>P12337

MLCALALASLAAGTAGHPSAPPVVDTVHGKVLGKFVSLLEGFAQPVAVFLGVPFAKPPLGS  
LRFAPPQPAESSHVKNNTSYPPMCSQDAVSGHMLSELFTNRKENIPLKFSDECLYLNITYT  
PADLTKRGRPLVMVIHGGGLMVGASTYDGLALSAHENVVVTIQYRLGIGFFSTGDEHS  
RGNHLDQVAALRVQDNIANFGGDPGSVTIFGESAGGQSVSILLLSPLTKNLFHRAISES  
GVALLSLFRKNTKSLAEKIAIEAGCKTTTTSAVMVHCLRQKTEEELMEVTLKMKFMALDL  
VGDPKENTAFLLTVIDGVLLPKAPAEILAEKKYNMLPYMVGINQQEFGIIPMQMLGYPLS  
EGKLDQKTATELLKSYPIVNVSKELTPVATEKYLGTTDDPVKKKDLFLDMLADLLFGVPS  
VNVARHHRDAGAPTYMYEYRYRPSFSSDMRPKTVIGDHGDEIFSVLGAPFLKEGATEEEI  
KLSKMVMKYANFARNGNPNGEGLPQPAYDYKEGYLQIGATTQAAQKLKDEVAFTELAKE  
AARPRETEHIEL

>P13011

MPAHILQEISGAYSATTTITAPPSSGGQONGGEKFEKSSHGADVRPELKDDLYDPTYQDD  
EGPPPKLEYVRNIILMALLHLGALYGITLVPSCLYTCLFAYLYYVISALGITAGAHRLS  
HRTYKARLPLRFLI IANTMAFQNDVYEARDHRAHKKFSETHADPHNSRRGFFFSHVGLL  
VRKHPAVKEKGGKLDMSDLKAEKLVMFQRRYYKPDLLLMCFVLPTLVPYCGETFVNLSLVCV  
STFLRYAVVLNATLVNSAAHLYGYRPHYDKNISSRENILVSMGAVGERFHNYHHAFFPYDYS  
ASEYRHINFTTTTFFIDCMALLGLAYDRKRVSRRAAVLARIKRTGDGSKSG

>P13516

MPAHMLQEISSSYTTTTTITAPPSSGNEREKVKTVPLHLEEDIRPEMKEDIHDPTYQDEEG  
PPPKLEYVRNIILMVLLHLGGLYGIILVPSCKLYTCLFGIFYYMTSALGITAGAHRLSHR  
TYKARLPLRIFLI IANTMAFQNDVYEARDHRAHKKFSETHADPHNSRRGFFFSHVGLLVR  
KHPAVKEKGGKLDMSDLKAEKLVMFQRRYYKPGLLLMCFILPTLVPYCGETFVNLSLFSVST  
FLRYTLVLNATLVNSAAHLYGYRPHYDKNIQSRENILVSLGAVGEGFHNYHHTFFPYDYSAS  
EYRHINFTTTTFFIDCMAALGLAYDRKKVSKATVLARIKRTGDGSHKSS

>P16232

MKKYLLPVLVLCGLGYYYSTNEEFREPEMLQGGKVIIVTGASKGIGREMAHYLSKMGAVVLT



ARSEGLQKVVSRCLELGAASAHYIAGTMEDMAFAERFVVEAGKLLGGDMLILNHITQT  
TMSLFHDDIHSVRRSMEVNFLSYVVLSTAALPMLKQSNQSGIAIISSMAGKMTQPLIASYS  
ASKFALDGGFFSTIRKEHLMTKVNSITLVCVLGFIDTETALKETSGIILSQAAPKEECALE  
I IKGTVLRKDEVYDKSSTPLLLGNPGRRIMEFLSLRSYNRDLFVSN

>P19324

MRSLLLGTLCLLAVALAAEVKKPLEAAAPGTAEKLSKATTLAERSTGLAFSLYQAMAKD  
QAVENILLSPLVVASSLGLVSLGGKATTASQAKAVLSAEKLRDEEVHTGLGELLRSLSNS  
TARNVTKLGSRLYGPSSVSFADDFVRSKQHYNCEHSKINFRDKRSALQSINEASQTTDG  
KLPEVTKDVERTDGALLVNAMEFFKPHDERFHHRMVDNRGFMVTRSYTVGVMMHRTGLYN  
YYDDEKEKQLQMVEMPLAHKLSLIILMPHHVEPLERLEKLLTKEQLKAMGKMQKKAVAIS  
LPKGVVEVTHDLQKHLAAGLGLTEAIDKNKADLSRMSGKKDLYLASVFHATAFEDTEGNPF  
DQDIYGREELRSPKLFYADHPFIFLVRDNQSGSLLFIGRLVRPKGDKMRDEL

>P81999

MAPQNLGTLCLLLLYLLGAAIAGRDFYKILGVPRSASIKDIKKAYRKLALQLHPDRNPDD  
PRAQEKFDLGAAYEVLSDSEKQYDQTYGEEGLKDGHQSSHGDIFSHFFGDFGFMFGGT  
PRQQDRNIPRGSDIIVDLEVTLEEVYAGNFVEVVRNKPVARQAPGKRKCNCRQEMRTTQL  
GPGRFQMTQEVVCECPNVKLVNEERTLEVEIEPGVRDGMETPFIFEGEPHVDGEPGDLR  
FRIKVVKHPIFERRGDDLYTNVTISLVESLVGFDMDITHLDGHKVHISRDKITRPGAKLK  
KGEGLPNFDNNNIKGSLIITFDVDFPKEQLTEEAREGIKQLLNQGSVQKVYNGLOGY

>Q29550

MLLPLVLTSLASSATAGQPASPPVVDTAQGRVLGKYVSLEGLAQPVAVFLGVPPFAKPLG  
SLRFAPPQPAEPSFVKNTTSYPPMCCQDPVVEQMTSDLFTNGKERLTLEFSEDCLYLNIIY  
TPADLTKRGRLPVMVIHGGGLVLGGAPMYDGVVLAHENVVVAIQYRLGIGFFSTGDEH  
SRGNHLDQVAALHVQENIANFGGDPGSVTIFGESAGGESVSVLVLSPLAKNLFHRAISE  
SGVALTVALVRKDMKAAKQIAVLAGCKTTTSAVFVHCLRQKSEDELDDTLTKMKFLTLTLD  
FHGDQRESHPFLPTVVDGVLLPKMPEEILAEKDFNTVPYIVGINKQEFGLLPTMMGFPLS  
EGKLDQKTATSLKSYPIANIPEELTPVATDKYLGTTDDPVKKKDLFLDLMGDVVFGVPS  
VTVARQHRDAGAPTYMYEFQYRPSFSSDKKPKTVIGDHGDEIFSVFGFPLLKGDAPEEEEV  
SLSKTVMKFANFARSGNPNGEGLPHMYDQEEGYLQIGVNTQAAKRLKGEEVAFNDLLSK  
EAAKKPPKIKHAEL

>Q64176

MCLSALILVSLAAFTAGAGHPSSPPMVDTVQGVKLVGKYISLEGFTQPVAVFLGVPPFAKPP  
LGLSLRFAPPQPAEPSVKNATSYPPMCFQDPVTGQIVNDLLTNRKEKIPLQFSEDCLYLN  
IYTPADLTKSDRLPVMVIHGGGLVLGGASTYDGLVLSTHENVVVVVIQYRLGIGFFSTGD  
EHSRGNHLDQVAALHVQDNIKFGGDPGSVTIFGESAGGESVSVLVLSPLAKNLFQRAI  
SESGVALTAGLVKKNTRPLAEKIAVISGCKNTTSAAMVHCLRQKTEEELLGTTLKLNLFK  
LDLHGDSRQSHFPVPTVLDGVLLPKMPEEILAEKNFNTVPYIVGINKQEFGLLPTMMNYP  
PSDVKLDQMTAMSLKSSFLNLPEDAIAVAIEKYLRDKDYTGKNDQLELIGDVVFG  
VPSVIVSRGHRDAGAPTYMYEFQYSPSFSSEMKPDTVVGDHGDEIYSVFGAPILRGGTSE  
EEINLSKMMMFKANFARNGNPNQGLPHPEYDQKEGYLQIGATTQQAQKLKEKEVAFTTEL  
LAKKQLPTEHTEL

>Q64573

MCLSFLVSLATCVVYGNPSSPPVVDTTKGKLVGKYVSLEGVTQSVAVFLGVPPFAKPL  
GSLRFAPPQPAEPSFVKNTTTPMCSQDAAGQRMNDLLTNRKEKIHLEFSEDCLYLNII

YTPADFTKNSRLPVMVIHGGGMTLGGASTYDGRVLSAYENVVVVAIQYRLGIGFFSTGDE  
HSRGNHGLDQVAALHVQDNIANFGGDPGSVTIFGESAGGFSVSVLVLSPLTKNLFHRAIS  
ESGVVFLPGLLTKDVRPAAKQIADMAGCETTTSAIIVHCLRQKTEEELLEIMKKMNLIKL  
SSQRDNKESYHFLSTVVDNVVLPKDPKEILAEKNFNTVPYIVGINKQECGLLPTMMGFVP  
ADVELDKKMAITLLEKFASLYGIPEDIIPVAIEKYRKGSDDSIKIRDGILAFIGDVSFSI  
PSVMVSRDHRDAGAPTYMYEYQYYPSSFSPQRPKHVVDHADDLYSVFGAPILRDGASEE  
EIKLSKMVMKFANFARNGNPNRGLPHPQYDQKEEYLQIGATTQOSQRLKAE EVAFTQLL  
AKRQPQPHHNEL

>Q6AYY8

MSPTISHKDNSRQRSGMFGHALDMKSGPLPPGGDDNHQDSVGGEGDREVLGDIVGPGDF  
PKAKRSYRAELSSILLLLFLYVLQGIPLGLAGSIPLILQSKNVSYTDQAFFSFVFPFSLK  
LLAPLVDAVYFKNFGRKSLVPTQYILGIFMIYLSTQVDRLLGNIDGRTPDVVALTVTFF  
LFEFLAATQDIAVDGALTMLSRENVGYASTCNSVGQTAGYFLGNVLFLESAADFCNKYL  
RFQPQPRGIVTSLDFLFFGTVFLITTTLVALLKKTREASVVKEETQGITDTYKLLFSII  
KMPAVLAFCLLILTSKIGFSAADAVTGLKLVEEGVPKEHLALLAVPMVPLQIILPLLISK  
YTAGPQPLNIFYKAMPYRLLLGLEAYLLVTPKVEHQGGFPIYYYIIVLLSYALHQVTLYS  
MYVSIMAFNAKVSDPLIGGTYMTLLNTVSNLGGNPSTVALLVDPLTVKECVGASNQNCRT  
PEAIELCKKLGSCVTALDGYVESIVCVLIGFGFFLGPKFKKLQDEGPSSKCKRTN

>Q6P7B9

MPAHILQEISGSYSATTTITAPPSGGQONGGEKFEKNPHHGADVRPEIKDDLYDPSYQDE  
EGPPPKLEYVRNIVLMALLHIGALYGITLVPSCKVYTCLFAYLYYVISALGITAGAHRLS  
HRTYKARLPLRLFLIIANTMAFQNDVYEARDHRAHHKFSETHADPHNSRRGFFFSHVGLL  
VRKHPAVKEKGGKLDMSDLKAEKLVMFQRRYKPGLLMCFILPTLVPYCGETFVNLSLCV  
STFLRYAVVLNATLVNSAAHLYGYRYPYDKNISSRENILVSMGAVGEGFHNYHHAFPYDYS  
ASEYRHINFTTFFIDCMALLGLAYDRKRVSKAAVLARIKRTGEESCKSG

>Q6QLL4

MAFLKKYLLTILMVFLAYYYYSANEFKFRPEMLQKKVIVTGASKGIGREIAYHLAKMGAH  
VVVTARSKEALQKVVARCLELGAASAHYIAGSMEDMTFAEEFVAEAGNLMGGLDMLILNH  
VLYNRLTFFHGEIDNVRKSMEVNFHSFVVLSVAAMPMLMQSQGSIAVVSSVAGKITYPELI  
APYSASKFALDGGFSTLRSEFLVNKVNVSITLCLGLIDTETAIKATSGIYLGPAKPKEE  
CALEI IKGTALRQDEMYVGSRVYLLGNPGRKIMEFLSAAEYNDNVLSNEKLYGRA

>Q99KV1

MAPQNLSTFCLLLLYLIGTVIAGRDFYKILGVPRASIKDIKKAYRKLALQLHPDRNPDD  
PQAQEKFDLGAAYEVLSDSEKQYDYTYGEEGLKDGHQSSHGDI FSHFFGDFGFMFGGT  
PRQQDRNIPRGSDIIVDLEVTLEEVYAGNFVEVVRNKPVARQAPGKRKCNCRQEMRTTQL  
GPGRFQMTQEVVCECPNVKLVNEERTLEVEIEPGVRDGMETPFIGEPEPHVDGEPGDLR  
FRIKVVKHRI FERRGDDLYTNVTVSLVEALVGFEMDITHLDGHKVHISRDKITRPGAKLK  
KGEGLPNFDNNNIKGLIITFDVDFPKEQLTEEAKEGKQLLQGPVQKVYNGLQGY

>Q9D1Q6

MNPAVFLSLADLRCSLLLLVTSIFTPITAEIASLDSENIDEILNNADVALVNFYADCRFS  
QMLHPIFEEASDVIKEEYPDKNQVVFARVDCDQHS DIAQRIRISKYPTLKLFRNGMMMKR  
EYRGQRSVKALADYIRQQKSNPVHEIQSLDEVNTLDRSKRNIIGYFEQKDSENYRVFERV  
ASILHDDCAFLSAFGDLSKPERYNGDNVIYKPPGRSAPDMVYLGSMTNFDVTYNIQDKCV  
PLVREITFENGEELTEEGLPFLILFHMKDDTESLEIFQNEVARQLISEKGTINFLHADCD

KFRHPLLHIQKTPADCPVIAIDFRHMYVFGDFKDVLIPGKQFVFDLHSGKLRHREFHH  
GPDPTDTAPGEQDQDVASSPPPESSFQKLAPSEYRYTLLRDRDEL

>Q9TT94

MPAHLLQEEISSSYTTTTTITAPPSRVLQNGGGKLEKTPLYLEEDIRPEMRDDIYDPTYQ  
DKEGPKPKLEYVRNIILMSLLHLGALYGITLIPTCKIYTYIVLFYFLMGALGITAGAHRL  
SHRTYKARLPLRVFLIIGNTMAFQNDVFESRDHRAHKKFSETDADPHNSRRGFFFSHVGL  
LVRKHPAVKEKGSTLNLSDLRAEKLVMFQRRYKPGVLLLCFILPTLVPLYLDETFQNSLF  
FATLFRYALGLNVTLVNSAAHMYGYRKYDKTINPRENIVSLGAAGEGFHNYHHTFPYDY  
SASEYRHINFTTFFIDCMAAIGLAYDRKKVSKAAILARIKRTGEEESYKSG

#### (4) 30 extracellular proteins

>A1EC31

MDIDLLSFGGFFILFPETINYCMAKLRSTSQISHFTNPRSCSSLFFVALLIITILITMLQ  
SSTSMEVTSPLPTHQPTSSNSHDESSTSSTATTTTDLHPKRTHHQSHPKPTRSFEGAHEV  
PSGPNPISNR

>A2AJ76

MTPGAQLLPLLVAISTAVAAVVTSDAPTKTSLSPATGDATLAFVFDVTGSMDDLMOVIDGA  
SRI LERSLSSRSRVIANALVPPHDPDIGVTLTADPVVFQRELRELYVQGGGDCPEMSV  
GAIKAAVEVANPGSFIYVFS DARAKDYHKKKELLQLLQLKQSQVVFVLTGDCGDRTHPGY  
LVFEEIASTSSGQVFQLDKQQVSEVLKVESAIQASKVHLLSADHEEEGEHTRIPFDPSLK  
EVTIALSGPGPEIEVRDPLGRVLQTDGLNVLNIPDSAKVVAFKPEHPGLAIKVYSSGR  
HSVRIISGINSINFRAGFSMQPSLDLNHTIEPLQGVPIISLVINSTGLQAPGHLESVELSHS  
SGRSLTLPTQLLSNGSTHQLAGPPFHVPKERFYLVKVKGDHEGNPLLRVSGVSYSAVAP  
GVPLVSMAPKIHGYLQQPLLVS CSVYSTLPFQLQLQRDGERLGEERYFQESGNSSEIPRA  
SKAEEGTYQCI AVSRAGSGRASAQIVITDPPPQLVPGPNVTVSPGETAILSCQVLGETPY  
NLTVRDRALPATTGRISQLSDLSLEVRSIIPTDGGQYQCVASNPNGVTRATLLVREAPQ  
VSINARSQRFSQGVVVRVSCSASGYPTPHISSREGLALPEDSRIHVDAQGTLLIQGLAPE  
DAGNYSCQATNEVGTDEETVTLTYTDPSSVSAVNAVVLTAVGEEAVLLCAASGVPPPVI  
YRGGLEVILAPGDSRSGTLRIPEAQERDAGLYTCKAVNELGDASAEIQLVVGNAPRLTDP  
PQDVTVELGKSVFLTCRATGRPPPIVTRRGDQALEPGRGSRGTGQRDSGVLVFERVSLED  
QAPYVCEARNVFGKAQAEARLVVTGHAPPQIANSASVVRVLEGQPVSLTCVILAGRPLPE  
RRLKAGSPLPPGNRHAVRADGSLHLDRALQEDAGRYSCVATNVAGSQHRDVELVVQVPPR  
IHPTSTHHVTNEGV PASLPCIASGVPTPKITTKETNALTTSGHYSVSRNGTLVIVQPSPO  
DAGAYVCTATNSVGFSSQEMLSVNTKPMIKMNGSQAVDVPLRVTVKAGEEVLTDCEAQQS  
PTPLLTTKDANPLL PVTNRYELLPSGSLRLAQAQVGDNGLYGCTASNPA GATSRRYVLRV  
QVPPQVQPGPRVLKVLAGEALDLNCVAEGNPQPQLNFKDGMALMGEQAQGSVHFAAVKTS  
DAGLYRCEASNSAGTDTKLELLVLEPPHGTDETKSLLERVAGENASLPCPAQGT PKPRIT  
RRGPSSEPLNGRPDVAVLDEGSLFLSSVSLADSGEYECQATNEVGSASRAKLVVYVPPS  
IREEGHITNVSGLAGQPLTLECDINGFPAPEVALKDGQLVGDSSGGDGEESGHRLLDGS  
RSLHFPRIQESHSGLYSCQAENQAGSAQRDFNLAVFI PPSLLGAGAAQEV LGLAGADVTL  
ECQTSGVPTPQVETKDGQPI LPGDPHILLQEDGQVLRIISSHLGDEGQYQCVAFSPAGQQ  
AKDFQLSIHSPPTIGSNETGEVTVLEGHTAQLLCEARGMPSPAITYKDGTLLAPSSEVVY  
SKGGRQLQLVKAQPSDAGLYTCQASNPA GITKKSTSLEVYVPPTIEGADGGPYLVQAVAG  
RPVALECVARGHPPPTISQHEGLPVVDSNGTLEAGGALQLENPGEASGGLYSCVASSPAG  
EAVLQYSVEMQVPPQLLVAEGMQVTATVQSLDLPCQASGSPVPTIQQLQNGRPAEELAG

VQLASQGTILHISHVELNHSGLFACQATNEAGTAGAEVEVSVHGKQVSVNLGASFSAHHG  
EPHSPFPATCNPPVCRHSAYPKPSLVERRGRGNLRGQPSGTVREPGLTLLSQIEKADLRD  
EGVYTCSATNLAGESKKDVTCLKVLVPPNIEPGPVNKVVLENASVTLECLASGVPPDVSF  
KGRQPISTQRRVIVSADGRVLHIERVQLSDAGSYRCVATNVAGSAGLKYGLRVNVPFRIT  
LPPNLPGPVLLGTPFRLTCNATGTPRPTLILKDGNPVSPEGI PGLKVFPGGQVLTVASAR  
ASDSGSYS CVAVS AVGEDRRDVILQVHMPPSILGEE LNMSVVVNESVTLE CQSHAVPPP  
LRQKDG RPLEPHPGIRLSADKALLEVDRAAVDAGHYTCEAINQAGRSEKHFNLHVPPAF  
PSKEYTTLTVTEGQTARLSCDCQGI PFPKISRKDGQPLPGE GDSLEQVLA VGRLLYLQQA  
QSAQEGTYTCECSNAAGTSSQEQSLEVLVPPQVTGLEPLTTVSVIQDGN TLLACNATGKP  
LPVVTQRD GQPVSVEPGLRLQNQN HSLHVERAQASHAGGYSCVAENTAGRAERRFALS  
VLA APPHLTGDSDSL T NVTATLHGSFTLLCEAAGVPAPT VQFQEGQPI SPREGTYLLAGGMLK  
MTQAQE QDRGLYSCLASNEAGEARRNFSVEVLVPPS IENEDLEEVIKVPEGQTAQLE CNA  
TGHPPKVTFKDGQSLTVEDPYEMSPDGAFLIPQANLSNAGHYSCIASNAVGEKTKHTQL  
SVLVVPTILGVPEKNANEEVTVTINNPI SLICEALAFPS PNI TMKDGSPFEASKNIQLLP  
GTHGLQILNAQKEDAGQYTCVVTNELGEATKNYHVEVLI PPSISKDDPLGEVSVKEVTK  
VNSSLTLECECATPPPSISYKDG R PVTPSHRLSVLGEGRLLQIQPTQVSDSGRYLCVATN  
VAGEDDQDFNVL IQVPPMFQKMGD VDAGFEPLPHEEEAQGRVTEYRE IVENNPAYLYCDT  
NAIPPELTYREGQPLSAADGVS V LQGGRI LQLPLVQAEDAGRY SCKAANEVGEDLHYEL  
LVLT PPIPGDTQELVEEVTVNASSAVSLECPALGNPAPAVSFQNGLPVSPSPRLQVLEE  
GQVLKVATAEVADAASYMCVAENQAGSAEKLFTLKVQVPPQISDTTSQLTATLNSSVSLP  
CEVYAHPNPEV TYKDGQPLSLGQEAFLLPGTHTLRLARAQPADSGTYLCEALNAAGR DQK  
MVQLNVLVPPSFKQAPGGPQEAIQVRAGDKAILSCETDSLPEPAVTFKDQQLALGQRIQ  
GLQGGQ TLEILDSQASDKGVYSCKVSN TAGEAIRTFVLAIQVPPTFEKPERETVNQVAGR  
TLVLACDVSGIPAPVTTLKDRLPV ESSVHVGVSRGGRLQLSHLQPAQAGTYTCVAENAQ  
AEARKDFVVS VLVPPQIQDSGMAQEHN VLEKQEIRLHCEAEGQPPPDITLKDGGLLDQHV  
GPHLRFYLDGSTLV LKGLRTADSGAYTCVAHN PAGEDARLHTVNVLPPTIKQQAGDTGT  
LVSRTGELVTMCPVQGSPP IHVSLKDGLPLPLSQRTLLHSSGR TLRISQVQLADSGVFT  
CVAASPAGVADRNF TLLVLPPILEPVEFQNNVMAAQGSEVVLPC EARGSPPLVSMKDG  
EPLLPQSLEQGPGLKLESVSVGDAGTYSCTAASEAGEARRHFQLTVMDPPHIEESGETSE  
LSLTPGAHLELLCEARGIPPPNITHKDGQALRRTENDSQAGRVL RVDNAGLYTCLAESPA  
GEVEKSFVRVQAPPNVVGP RGRSVVGLAPGQLILECSVEAEPAPEIEHRGGVLLQADA  
HTHFPEQGRFLKLQALSTADGGDY SCTARNRAGSTSVAFRVEIHTAPT IQSGPNTVNVSV  
NRTLLPCQTHGVPTPLVSRKDG IPLHPGSPRLEFLPEGSLRIHPVLAQDAGHYLCLASN  
SAGSDRKGLDLRVFEP PAIAPGPSNLTLTAYS PASLPCEARGSPKPLVTKDGQKLDLRLQ  
QGAYRLLPSNALFLTAPSPQDSAQFECVVSNEVGESRRRYQVTVHVPPTIADDQTHFTVT  
RMAPVILTCHSTGSPTPAVSSKAGTQLGARGSGYRILPSGALEIERALPLHAGRYTCTAR  
NSAGVARKHMVLT VQASPVVKPLPSVVQVVASEEVLLPCEASGIPQPMVIQKEGLSIP EG  
AHMQVLPSGQLRIMHASPEDAGNYFCIAQNSVGSAMAKTRLVVQVPPVIENGLPDLSTIE  
GSHALLPCTAKGSPEPAITEKDGLVSGAEGKFTLQPSGELLVKNSEGQDAGTYICTAEN  
AVGRARRRVHLTILTL PVLTTLPGDRSLRLGDRLLRCVARGSPTPRIGTINDQPVTEGVS  
EQDGGSTLQRAAVTREDSGTYTCAENRVGRVQAVSFVHVKEAPVLQGEAFSYLVEPVGGS  
IQLHCVVRGDPAPDIHTKDGLPLPISR LHFQLQNGSLTILRTKMDDAGRYQCLAVNEMGT  
VKKVTVVLQ SAPVFQVEPQDVTVRSGVDVELRCRATGEPVPTIELRAGRPLQAGRKLRA  
LPDGSLLHVEAGDAGVYECVAHNHLGSVTAKALLAVRGEPRGSRGSM TGVINGQEFGMA

TLNISVLQQGSSEAPTISSISQVPASVGPLMRVLVVTIAPIYALARESGEALNGYSLTGG  
SFQQESQMEFSTGELLTMTQVARGLDPDGLLLVDMKINGMIPESLADGDLRVQDFQEHYV  
QTGPGQLFAGSTQRFLHDSLPAASLRNHSIQYDETRGLQPQLVQHRLRASSISSAFDPEAE  
ALNFQLTTALQTEENEVGCPEGFEPDVQGAFCVVKDECSGGPSPCSHTCRNAPGHFSCSC  
PTGFSLADHRNCRDVDECAGNTHLCQEEQRCVNLLGSYNCLASCRPGFRVTADGSNCEDV  
DECLEQLDECHYNQLCENTPGGHHCPCPRGYRQQGHSLPCLDINECLQLPTPCVYQCQNL  
QGSYRCLCPPGQTLRLDRGRTCIPLERNRQNIITIVSHRSPFGPLRSRVPRPSSSYHTVSLR  
PGSGALNSVGRACPPGFIRQDGVACADLDECRVRSQCQHACQNTGEGSYCLCPSGYRLLPS  
GKNCQDINECEEDGIECGPGQMCFNTRGSFQCVDTPCPTTYRQSSPGTCFRRCSDQCSA  
SGPSTLQYRLLPLPLGVRAHHDVARLAAFSEAGIPANRTELTVLEPDPRSPFALRQLRAG  
QGAVYTRRALTRAGLYRLTVRAAAPRHQSVYILLIAVSPYPY

>A2ASQ1

MPPLPLEHRPRQQPGASVLVRYFMIPCNICLILLATSTLGFAVLLFSLNYKPGIHFTAAP  
SMPDVCVRGMLCGFGAVCEPSVEDPGRASCVCCKNVCAMVAVPCGSDASTYSNECELQR  
AQCNQQRRIRLLRQGPGCSRDPANVTCSFGSTCVPSADGQTASCLCPTTCFGAPDGTVC  
GSDGVDYPSECQLLRHACANQEHIFKKFDGPCDPCQGSMSDLNHCVRNPRTRHPMLLR  
PENCPAQHTPICGDDGVTYENDCVMSRIGAARGLLLQKVRSGQCQTRDQCPETCQFNSVC  
LSRRGRPHCSDRVTCDGAYRPVCAQDGHTYDNDCRQQAECRQQQTIPPKHQGPCDQTPS  
PCRGACAFGATCTVKNGKAVCECQRVCSGGYDPVCGSDGVTYGSVCELESMACTLGREI  
RVARRGPCDRCGQCRFGSLCEVETGRCVCPSECVESAQPVCSDGHTYASECELHVHACT  
HQISLYVASAGHCQTCGETVCTFGAVCSAGQCVCPRCEHPPPGPVCSDGVTYLSACELR  
EAACQQQVQIEEARAGPCEPAECGSGGSGGEDNACEQELCRQHGGVDEDESDGPCVCDF  
SCQSVLKSPVCGSDGVTYSTECHLKKARCEARQELYVAAQGACRGPTLAPLLPMASPHCA  
QTPYGCCQDNVTAAQGVGLAGCPSTCHCNPHGSYSGTCDPVTGQCSCRPGVGGRLCRDCE  
PGFNFRGIVTDGHSCTPCSCDPRGAVRDDCEQMTGLCSCRPGVAGPKCGQCPDQALGH  
LGCEADPTTPVTCVEMHCEFGASCVEEAGFAQCVCPTLTCPEANSTKVCSDGVTYGNEC  
QLKTIACRQRDLISIQSLGPCRESVAPGVSPTSASMTTPRHILSRTLASPHSSLPLSPST  
TAHDPTPLPTSPQTVVGTTPRSTAATPSDVASLATAIFRESGSTNGSGDEELSGDEEASGG  
GSGGLEPPVGSVVVTHGPPIERASCYNSPLGCCSDGKTPSLDSEGSNCPATKAFQGVLEL  
EGVEGQELFYTPEMADPKSELFGETARSIESTLDDLFNRNSDVKKDFSIRLRELGPGLVR  
AIVDVHFDPTTAFQAPDVGQALLQQIQVSRPALAVRRPLREHVRFLDFDFPTFFTGAATG  
TTAAVATARATTVSRLSASSVTPRVYPSYTSRPVGRTTAPLTTRRPPTTTASIDRPRTPG  
PQRPPKSCDSQPCLHGGTCQDLDSGKGFSCSCTAGRAGTVCEKVQLPSVPAFKGHSFLAF  
PTLRAYHTLRLEFRALTEGLLLYNGNARGKDFLALALLDGHVQFRFDTGSGPAVLTS  
LVPVEPGRHRLELSRHRQGTLSVDGEAPVVGESPSGTDGLNLDTKLYVGGLEPEEQVATVL  
DRTSVIGLKGCI RMLDINNQQLELSDQRAVVQSSGVGECGDHPCSPNPCHGGALCQALE  
AGVFLCQCPPGRFGPTCADEKNPCQPNPCHGSAPCHVLSRGGAKCACPLGRSGSFCETVL  
ENAGSRPFLADFNFSYLELKLGLHTFERDLGEMALEMVFLARGPSGLLLYNGQKTDGKG  
DFVSLALHNRHLEFRYDLGKGAAIIRSKEPIALGTVRVFLERNRKGALQVGDGPRVLGE  
SPKSRKVPHTMLNLKEPLYVGGAPDFSKLARGAAVASGFDGAIQLVSLRQGLLQEHVL  
RAVDVAPFAGHPCTQAVDNPCLNNGSCIPREATYECLCPGGFSGLHCEKGIVEKSVGDLE  
TLAFDGRTYIEYLNVAVTESELNEIPAPETLDSRALFSEKALQSNHFELSLRTEATQGLV  
LIGKVGERADYMALAIVDGHQLSYDLGSQPVLRSTVKVNTNRLRVRAHREHREGSLQV  
GNEAPVTGSSPLGATQLDLDGALLGGLQKLPVQALPKAYGTGFGVCLRDVVVGHRLHL

LEDAVTKPELRPCPTL

>E5KIB6

MRSEMTLTSTNSAEALAAQDFANTVLSAAAPGFHADCEPAMATPATPTVAQFVIQGSTI  
CLVC

>O00468

MAGRSHPGPLRPLLPLLVAAACVLPGAGGTCPERALERREEEANVVLTGTVEEILNVDPV  
QHTYSCKVRVRYLK GKDLVARESLLDGGNKVVISGFGDPLICDNQVSTGDTRIFFVNPAP  
PYLPAHKNELMLNSSLMRITLRNLEEVEFCVEDKPGTHFTPVPPTPPDACRGM LCGFGAV  
CEPNAEGPGRASCVCKKSPCPSV VAPVCGSDASTYSNECELQRAQCSQORRIRLLSRGPC  
GSRDPCSNVTC SFGSTCARSADGLTASCLCPATCRGAPEGTVCGSDGADYPGECQLLRA  
CARQENVFKKFDGPCDPCQGALPDPSRSCRVNPRTRRPEMLLRPE S C PARQAPVCGDDGV  
TYENDCVMGRSGAARGLLLQKVRSGQCQGRDQCPEPCRFNAVCLSRGRPRCSCDRVTCD  
GAYRPVCAQDGRTYDSDCRQQAECRQQRAIPSKHQGPCDQAPSPCLGVQCAFGATCAVKN  
GQAACECLQACSSLYDPVCGSDGVTYGSACELEATACTLGREIQVARKGPCDRCGQCRFG  
ALCEAETGRCVCPSECVALAQVCGSDGHTYPSECMLHVHACTHQISLHVASAGPCETCG  
DAVCAFGAVCSAGQVCVPRCEHPPPGVCGSDGVTYGSACELREAACLQQTQIEEARAGP  
CEQAECGSGSGSGEDGDCEQELCRQRGGIDEDSE DGPCVDFSCQSVPGSPVCGSDGVT  
YSTECELKKARCESQRGLYVAAQGACRGPTFAPLPPVAPLHCAQTPYGCCQDNITAARGV  
GLAGCPSACQCNPHGSYGGTCDPATGQCSCRPGVGGLRCDRCEPGFNFRGIVTDGRSGCT  
PCSCDPQGA VRDDCEQMTGLC SCKPGVAGPKCGQCPDGRALGPAGCEADASAPATCAEMR  
CEFGARCVEESGSAHCVC PMLTCPEANATKVCSDGVTYGNECQLKTIACRQGLQISIQS  
LGPCQEAVAPSTHPTSASVTVTTPGLLLSQALPAPP GALPLAPSSTAHSQTT PPPSSRPR  
TTASVPRTTVPVLTVPPTAPSPAPSLVASAFGESGSTDGSSDEELSGDQEASGGGSGGLE  
PLEGSSVATPGPPVERASCYNALGCCSDGKTPSLDAEGSNCPATKVFQGVLELEGVVEGQ  
ELFYTPEMADPKSELFGETARSIESTLDDLFRNSDVKKDFRSVRLRDLGPGKSVRAIVDV  
HFDPTTAFRAPDVARALLRQIQVSRRRSLGVRRLQEHVRFMDFDFPAFITGATSGAIAA  
GATARATTASRLPSSAVTPRAPH SHTSQPVAKTTAAPTTRRPPTTAPSRVPGRRPPAPQ  
QPPKPCDSQPCFHGGTCQDALGGGFTCSCPAGRGGAVCEKVLGAPVPAFEGRSFLAFPTL  
RAYHTLRLALEFRALEPOGLLLYNGNARGKDFLALALLDGRVQLRFDTGSGPAVLTSAVP  
VEPGQHRLELSRHRGTL SVDGETPVLGESPSGTDGLNLD TDLFVGGVPEDQAAVALERT  
FVGAGLRGCI RLLDVNNQRLELGIGPGAATRGSVGECDHPCLPNPCHGGAPCQNLEAG  
RFHCQCPPGRVGP TCADEKSPCQPNPCHGAAPCRVLP EGGAQCECPLGREGTFCQTASGQ  
DGSGPFLADFN GF SHLELRGLHTFARDLGEKMALEVVF LARGPSGLLLYNGQKTDGKGF  
VSLALRRRLEFRYDLGKGA AVIRSREPVT LGATRVSLE RNRK GALRVGDGPRVLGES P  
VPHTVNLNKEPLYVGGAPDFSKLARAAAVSSGFDGAIQLVSLGGRQLLTPEHVLRQVDVT  
SFAGHPCTRASGHPCLNGASCVPREAA YVCLCPGGFSGPHCEKGLVEKSAGD VDTLAFDG  
RTFVEYLN AVTESEKALQSNHFELSLRTEATQGLVLSGKATERADYVALAIVDGH LQLSY  
NLGSQPV VLRSTVPVNTNRLRVVAHREQREGSLQVGNEAPVTGSSPLGATQLD TDGALLG  
GLPELPVGPALPKAYGTGFVGC LRDVVVGRHPLHLLEDAVTKPELRPCPTP

>O00755

MNRKARRCLGHLFSLGMVYLRIGGFSSVVALGASII CNKIPGLAPRQRAICQSRPDAII  
VIGEGSQMGLDECQFQFRNGRNC SALGERTVFGKELKVG SREAAFTYAI IAAGVAHAITA  
ACTQGNLSDCGCDKEKQGYHRDEGKGGCSADIRY GIGFAKVFDAREIKQNARTLMNLH  
NNEAGRKILEENMKLECKCHGVSGSCTTKTCTTLPQFRELGYVLKDKYNEAVHVEPVRAS

RNKRPTFLKIKKPLSYRKPMDDLVIIEKSPNYCEEDPVTGSGVGTQGRACNKTAPQASGC  
DLMCCGRGYNTHQYARVQCNCCKFHCCYVKCNTCSERTEMYTCK

>O09118

MMRAVEALAAALAAVACLVGAVRGGPGLSMFAGQAAQPDPCSDENGHPRRCI PDFVNAAF  
KDVRVSSTCGRPPARYCVVSEERGEERVRSCHLCNSSDPKKAHPPAFLTDLNNPHNLTCQS  
ENYLQFPHNVTLTSLGKKFEVTVVSLQFCSPRPESMAIYKSMYGRTPVFPQFYSTQCRK  
MYNRPHRAPITKQNEQEAVCTDSHTDMRPLSGGLIAFSTLDGRPSAHDFDNSPVLQDVRTA  
TDIRVAFSRLHTFGDENEDDSELARDSYYYAVSDLQVGGRCCKNGHAARCVRDRDDSLVC  
DCRHNTAGPECDRCKPFHYDRPQRATAREANECVACNCNLHARRCRFMELYKLSGRKSG  
GVCLNCRHNTAGRHCHYCKEGFYRDMGKPI THRKACKACDCHPVGAAGKTCNQTTGQCPC  
KDGVTGITCNCAKGYQQSRSPIAPCIKIPVAPPTAASSAEEPEDCDSYCKASKGKMKM  
NMKKYCRKDYAVQIHILKADKAGDKFTVNIISVYKQGTSRIIRRGDQSLIRSRDIACKCPK  
IKPLKKYLLLGNEDSPDQSGIVADKSSLVIQRDTARRLRKFQQREKKGKCKKA

>O46378

LDHNNLTRMPGPLPRSLRELHLDHNQISRVPNNALEGLENLTAALYLQHNEIQEVGSSMRG  
LRSLILLDLSYNHLRRVPDGLPSALEQLYLEHNNVYTVPDSYFRGSPKLLYVRLSHNSLT  
NSGLASNTFNSSSLELDLSYNQLQKI

>O54767

MARQRVYLRLSLFFALVTSVNSLSLPOSENPAFPGTLICDKDEVRFVSSRFMEKNPSLV  
DTFGNEISNCTYALDLEKFIKFPYETCTIKVIGGYQVNIIRVQDTNADVSYKDDVHHFFC  
PAIQAEIHEVSEIVVCMEDLISFSFPQLFSRLADENQNVSEMGIIKIGNGTRVHTLPLKD  
AIVQGFNLLIDSQKITLHV PANATGVAHYVQESSYLYTVQLKLLFSSPGQKITFSSQAIC  
APDLSVACNVTHMSLTIPEFPGLKSVGFGQRNIPEDQHANGIDKEATNGLRLHFRKSL  
KTKPSEKCPFYQFYFSSLELTFNFQGDMLSTVIDPECHCESPVSIDELCTRDRGFMDFEY  
SHQTKPALNLESLLVGNSSCQPIFKVQSLGLARFHIPLNGCGTRQKFEQDKVIYENEIHA  
LENPPSNIIFRNSEFRMTVRCHYIRDSMLLRAHIKSHSSPVASVKPGPLALVLQTYPDIS  
YQRPYRKNYPLVRYLRQPIYMEVTVLNRNDPNIKLVLDCCATTFEDPASVPQQIIMDGC  
EYELDNYRTTFHAANSSAAHSGHYQRFDVKTFAFVSESRGLSSLIYFHCSALICNQASPL  
CSVTCAPLRNKREASKEGTMVSLPGPIILLSDSSSKGVMNPDSYEITKDIASKTLGA  
VAALVGSAVIIGFICYLHKKRIVRFNS

>O55189

MSASKIPLFKMKGLIIFLSLVKMSLAVPAFPQQPGAQGMAPPGMASLSLETMRQLGSLQG  
LNALSQYSRLGFGKALNSLLHGLLPPHNSFPPIGPREHETQQPSLQPHQPGLKPFLOPTAA  
TGVQVTPQKPGPQPPMHPGQLPLQEGELIAPDEPQVAPSENPTPEVPIMDFADPQFPPTV  
FQIARSISRGPMAHNKASAFYPGMFYMSYGANQLNAPARIGFMSSEEMPGERGSMPAYGT  
LFPRFGGFRQTLRRLNQNSPKGGDFTVEVDSVSVTKGPEKGEKPEGSPLQEANPGKREN  
PALLSQMAPGAHAGLLAFPNDHIPMARGPAGQRLLGVTAAAADPLITPELAEVYETYGA  
DVTTPLDGGEATMDITMSPDTQQPLLPGNKVHQVQVHNARFQEP

>O55196

MLLLQCRNPTSPPKPCGLVPNVKMSLLVFLGLLGVSAAMPFQMPMPRMPGFSSKSEEMMR  
YNQFNFMNAPPMMPMGYPYNGMPMPHMPYPPYQMPMPVPVNGQQPMPNFPSTQDQ  
TQETAKPNQTNPQEPQPKQPLKEPPNEAARAKDDAQPPQFPFPFGNGLYPYQPPPIQ  
RGPPTAFGRPKFSNEEGNPYYAFFGYHGFGGRPYYSSEEMFEDYEKPKEDPPKPEDPPP  
DPPPEASTNSTVPDANATQSIPEGGNDTSPIGNTGPGPNAGNNPTVQNGVFPKVNVS

QGVPKSQIPRPSQPNIYENYPYPNYPSEERQQTGTGQPRQNGPGYRNPQVERGPQNSFAE  
GKQATRPGNPTYGKPPSPTSGVNYAGNPVHFGRNLPGPKNKPFVGANPASNKPFVGANPAS  
NKPFVGANPASNKPFVGANPASNKPFVGANPASNKPYVGANPASNKPFVGANPAANKPSI  
GTNPAANKPSIGTNPAANKPFVRRNNVANKPFVGTNPSSNQPFLLRSNQASNKPFMRNSQA  
SNKPFVGTNVASVGPQVTVSHNMKTQNPKEKSLGQKERTVTPTKDASNPRSAKQYGINN  
PNYNLPRSEGSVMGPNFNSFDQQENSIFYFSKGASKRVSPNIQIQSQNLPGIALEPRRTP  
FQSETKKPELKHGTHQPAYPKKIPSPTRKHFAERNNTNRQKILPPLKEDYGRQDENLRHP  
SYGSRGNIIFYHEYTPYHNEKSQYIKSNPDKSSPSTMMRPENPQYTMSTSLDQKETEQYNE  
EDPIDPNEDESFPGQSRGDEEMNFKGNPTVRQYEGEHYASTLAKEYLPYSLSNPPKPSSE  
FPYSEFYPNPQETFPYIYNPGPTIAPPVDPERSYVNNNAIGQEESTLFPSTSDHRNQAERQK  
ESEPYFNRNVDQSINLHKSNI PNHPYSTTSPARFPKDPTFEGENLNLDLQITSLSPPERE  
QLAFPDFLQSYPTGQNEAHLFHQSQRGSCCIGGSTGHKDNVLAALQDYTSSYGLPPRKNQ  
ETSPVHTESSYIKYARPNVSPASILPSQRNISENKLTAESPNSPFGDGVPTVRKNTPY  
GKNQLETGIVAFSEASSSQPKNTPCLKSDLGGDRRDVLKQFFEGSQLSERTAGLTPEQLV  
IGIPDKGSGPDSIQSEVQKQEGEMQQQRPTIMKLPFCGNSKFSSTTGPPINRRRPTL  
LNGALSTPTESPNTLVGLATREQLKSINVDKLNADHETTLESFQGTSPQDQGCLLLQA  
>O55225

MGARMPRRCLLLLSCFCLLRVESTAEVQHQASALTKISAELQQEPAPEPSHTYQEMSLAV  
EDVTTVMEGQEAELAASAMSSERRLRHAKCAPSYLFSFCFNGGECVHPALCDCRRFNATG  
PRCQLVYNVGPERSICRTGQHVVETFDGLYYYFSGKGSYTLVGHHEPEGQSFISIQVHND  
PQCGSAHYTCPRSVSLFLSGEREICLAKEVTHGGVVRVQLPQVVGQVQLQQLAGYVIARHP  
SAFTLADGISAIYIKMSPEFLGTHGLCGNNADPQDDLVTSYGKVTDDVGEFVHSQEQVP  
NSPPGPVTTSLRPPCLQOSPASMQGVYERCEVLLRPPFDTCWAYVSPLPFAASCTSDLC  
QSGGDEATCRALMEYARACAQAGRPLQGRTOQLSQCCTVHCKEKAFIYNECIACCPASCQSR  
ASCVDSEITCVDGCYCPNGLIFEDGGCMSPAECPCEFHTLHPPGSVVTEDCNACTCTAG  
KVCSSSVCPAECSVTGDIHFTTFDGRRYTFPATCQYILAKSRSSGTFTVTLQNA PCGPNO  
DGACVQSVSVILHQDPRRQVTLTQAGDVLLFDQYKITPPYSDDAFEIRRLSSVFLRVRTN  
VGVRI LYDREGLRLYLQVDQRVEDTVGLCGTFNGNTQDDFLSPVGVPESTPQLFGNSKTL  
SACVPLVPGSLLDPCDVHLQAASYALQSCSVLTGELFAPCSAYLSPIPYFEQCRRDACRC  
GQPCLCATLAHYARLCRRHGLPVDFRAHL PACALSCEATKEYSPCVTL CAPTCQDLASPD  
VCGANGGNGFSREECVEGCTCPPDFTLDTQADLCVPRNQCSCHFQGVDPGSDIPSLG  
HCHCKDGVMSCD SRAPAAAC PAGQVFNCSSELHPDPELSRERTCEQQLNLSMPARGPCL  
SGCACPQGLLRHGDACFPPEEC PCTKQKEYFPQDQVVSSCHTCVCQRGSFQCTLHPCAST  
CTAYGDRHYRTFDGLPYDFVGACKVHLVKSTSELSFSVMVEDVNCYGSVVICRKSISINV  
GSSLIIFDDDSGDPSPEFLDEKQAVHIRAGFFTLVHFPREHITLLDQRTTVHVQAGPQQ  
GQLVGLCGNFDLKTINEMRTPENLELTNPQEFGSSAAVECPDTPDPGDTCVLNPLREPFA  
RKECGILLSEVFETCHPVVDVTFYSNCLTDTGCSRGGDCEFCASVAAYAHQCCQHGVV  
IDRTPRICPYDCDFFNKALGKGPYQLSSVAAGGTLVATKAVDSDIALVRAEDLAPGDISS  
FLLTAALYKAKAHPDVVSLEAADRPNFFLHTTANGSIGLAKQRDEAFHQHASFSLHRGT  
QAGLVALESLAKPGSFLHSSGLELALRAYEHTEVFRGGALFRLLDAKPLGAAAYPTCERYD  
ACASPCFQTCRDPRATSCQDVPGRSCVPVCPTPKVLDEVTQRCVYLEDCEVAPRGPTE  
LGNETLVPGQVPPTTSAEQQLPQGLPGASAYSPAPVPVAPPTSAPNPPMAATEGQAPSPG  
STQPTLQTPGLTTSNFPAGHTEATAREEGAASLLTTSHPGFSSSLPSLQMPSTSGIVS  
GATETTKVTITFTGSPNTTVASRSPPIPRFPMLTKAVTVPSHDSFPVKTTPLQPSLSLSS



RPMTSLGATSPPTSPGSHLSTAVTKVANKTMTSLSVLAQSTSSSSQPLAAVTTAHRAPAS  
PLVTKGLEVVSAATEKGEAGHSQLELTPVSPPPSPAPIDLPHPAQHNTTAPGPSALSPGIL  
AAGSPSTGAHRPGATALASLEPTRPHLLSGLPLDTSPLAKVGTSAVPATPGSKGYIPT  
PPPQHQAATTLATAMTVSPLTQSLSLTVPLMSAVEEQAHSPSPKPPQGTGMAPDQMLGATL  
PSFGASSVIAGVPPTVSAAPRKSTTQRAAILSKKVSPPTLISDSVQGGFTELTPIVSHTV  
TPLATEAEGPRAGTVPLVPTTYSLSRVSARTASREGPLVLLPQLAEAYGTPAGLQPQEDL  
MRQATTEQSGRSAPAQSI AEESMEAEVNTSATCVPIAEQDCVHHICLEGQLIRVNQTQHC  
PQGAVRPRCGVLGLAVRVGGDRCCPQECACRCSIFPDLSEVTFDGSAAALFKEAIYVLSQ  
SPDETI SVHVLDCKSANLGHLPFFCLVILNVTHLAHHVSI DRFNKVTVDVSVVPPMSR  
YGFRIEDTGHMYMVRTPSHIQIQIQLHSSGLMILEASKVSKTQGHGLCGICDGAANDLTLK  
DGSVLGEAEDPAPFLDSQVPSLTSEGQTRFRPDCATADCSPCLRMVSNRTFSACHSFV  
SPESFCELI RDTKYVQQPCVALTVYVAMCHKFHVCIERGSDYCPFLCSSDSTYQACVAAC  
EPPDTCQDGVLGPLDPEQCQVLGEGCVCTEGTILHRRHSALCIPEDKCACTDSTGVPRAL  
GETNSSLSGCCQQQCQAPDTIIPVDLDCPGPRPESCPRFGEVILLQPTEDPCCLGSVCVC  
NQTLCEGLAPTICRPGHSLITHFQEDSCCPSYSCECDPGLCEAEQVPTCREDQILIEGRLG  
DSCCTSIFCGGECSDPMPECQEGEALTVHRNTELCPLYQCVCENFRCPQVQCGMGTS  
LVEVSPDRCCPYKSCCEDCDTI PVPRCHLEKSQLD EEFMHSVENVCGCAKYECVKAPVCL  
SRELGVMPGQTVVELSADGVCHTSRCTDVLDPLTNFYQINITSVLCDMHCEANQEYDHP  
RDLAACCGRNVSCLFTFPNGTTSFLPLGAS IADCARHHCSTPLGAVLVRSPISCPPF  
NETECAKVGGSVPSLEGCCRACKEDGRSCKKVTIRMTIRKNDCRSNTFVNLVSCDGRCP  
SASIYHNINITYARFCKCCREVLQRRSVQLFCATNATVPYTVQEPTDCACQS  
>O62702

MASTICFILVVVFTDVTTRSVRQVYEASDPEDTMHDFDCPRECFCPPSFPTALYCENRGL  
KEIPAIPSRILYLENNLIETIPEKPFENATQLRINLNKNKITNYGIEKGALSQ LKKLLF  
LFLEDNELEEVPSPLPRSLEQLQLARNKVSRI PQGTFSNLENLTL LLDLQHNKLLDNAFQR  
DTFKGLKNLMQLNMAKNALRNMPRLPANTMQVFLDNNSIEGIPENYFNVIPKVAFLRLN  
HNKLS DAGLPSSGFNVSSILDQLSHNQLTKVPKIS AHLQHLHLDHNKIRNVNVSVICPS  
TPTTL PVEDSFSYGPLRRLRLDGNEIKPPI PMDLMTCFRLLQAVII  
>O70283

MLKLQGEDEAAQLAPRRARVPVPRPTAPDVSPSSARLGLACL LLLLLLLTLPARVDTSYIG  
ALGARVICDNI PGLVSRQRQLCQRYPDIMRSVGEAREIRECQHQRHHRNCTTLDRDHT  
VFGRAMLRSSREAAFYVAISSAGVVHAI TRACSQGELSVCS CDPYTRGRHHDQRGDFDGG  
CSDNIHYGVRFAKAFVDAKEKRLKDARALMNLHNNRCGR TAVRRFLKLECKCHGVSGST  
LRTCRA LSDFRRTGDYLRRLRYDGAVQVTATQDGANFTAARQGYRHATRDLVYFDNSPDY  
CVLDKASGSLGTAGRVCSKTSKGT DGCEIMCCGRGYDTTRVTRVTQCECKFHCCAVRCKE  
CRNTVDVHTCKAPKKAELDQT  
>O76536

SSHNPGQSFTTGT TTTVVYATDAFANVGQCAFTITVTATDTTPPVVTVSSSTITRQVEV  
GTPGVNVFFTEPTATDNSGQAILISRTNQPGDFFSVGQTI VTYTFQDPSGNPASGTVTIN  
VIEVDTPPVVTVPSTTITRQVEVGSSGVNVFYTEPTATDNSGQAILTSRTNQPGDFFV  
GQTTVYTFQDPSGNPASGTVTINVIEVDTPPVVTVPSTTITRQVEVGSSGVNVFYTEP  
TATDNSGQAILTSRTNQPGDFFVGVGQTTVYTFQDPSGNPASATVTINVIEVDTPPVV  
TVPSTTITRQVEIGTPGVNVFYTEPTATDNSGIANLVSRTNQPGDFFVGVGQTDVYTFQD  
PSGNPSSGTVTINVIEVDTTSPVITVPSNTITREVELGTPGVNVFYTEPTATDNSGIANL

VSRTNQPGDFFNVGQTVVTTYTFQDPSGNPASGTVTINVVEVDTPPQVFVTTGEVVRTAP  
FGSSGVNVFFTEPVAIDNSGTADLVSQTAQPGDFFPIGSTVVYRYRDASGNEATGTFTV  
TVEEMVDTPPTVTVSGGNIVRTVELGQSRLSVIYTEPTATDNSGEANLVSRTAQPGDLF  
PVGTTTVEYVYQDPAGNEGRGQFTVTVIAVDTPPSVNCNNVFQLEVELGTSSAPVFFTE  
PTAFDISGQANLVTRTAAPGDSFPVGTTSVSYIFSDNSGNEAEPCTFTVTISAVDTPPT  
VNCINNVAQTVQLGTGSTQVFFTEPTAFDISGQTSLVTRTSAPGDSFPVGTTSVTYIFTD  
ASGNNAQPCFTFNVVINAVDTPPTVNCANNIAQTIELGSTSAVVNYAEP SATDISGTAFL  
VSRSSSPGDSFPIGSTTVTYIFSDQSGNEAPCVFTVTIGTVDTMMPMFTSCPNIVQSV  
ELGVPGTVISTTPTANDAAGIASIVSNLQPGSFFT VGESATVTVATDNSGLTDNSCSFT  
VTVFAVDTPPSVCTNNVFQTVELGTNPVQVFYTEPTASDISGQANLVSRTNVPGDSFP  
VGTSTVTVYVFADNSGNTADACSEFTITVTAQDTPPTVNCITNIVRTVELGTSSVQVFYNE  
PTASDLGQASLVSRTAQPGDNFPVGVNPVTVYVFGDNSGNQADPCTFTITVNTQDTPPTV  
TCISDITRVVELGTT SVGISYTEPTATDISGTATLDSRSHTPGQNFVGVSTVVSYFFSD  
>O96530

NVEIGTPSTTVTTPTAIDASAVTTVSSHNPQSFITGTTTTVVYTATDEFGNIGQCAFT  
ITVTATDSIDPVTVSSGFITQQVEIGLGGVNVFYTEPTATDNSGTAVLFSRSAQPGDFF  
PVGQTVVYTI FQDPSGNFNGTGTFTVNVEVDTPPVVTVPNGIITRQVEIGTSGIIVFFS  
EPTATDNSGTAILDSRTHQPGDVFPVGTIVTYTFRDPAGNPATGTFTINVVEVDTPPV  
ITVPTPSIITRQVEVGT PGVS VFYQEPTATDNSGTAILVSRTNQPGDVFPVGT TVVYTF  
QDPSGNPASATVTINVVEVDTPPVI SVPSTFITRTVELGTPGVNVFYPEPTASDNSGTA  
ILVTRTNQPGDFFSVGQTVVYTYTFQDPTGNPATATVTINIVEEDTPPTVNCINDVIRTV  
ELGTTSAQVFYSEPTASDVGQATLISRTAQPGDSFPVGATVVYIFGDNAGNIADPCVFT  
ITVNTVDTPPTVNCVSDVVRVVELGTTSLAVVYTEPTATDISGTASLV  
>O97647

LHHQIIPVLSQHQTPTHALQSHHHIPVMATQQPTQPPQPMMPMPGQHSVTPQTQHHQSNLP  
QPGQQPFQPFQPKPTHRPIQPQAPVHPMPMPQQLPMPFPLQPLPPLLDLPLEPPAS  
>O97939

MLLSCRHGASSPKLDNLVPSGKMKILLVFLGLLCYSAAMPQMMPMPGFSSKSEEMMYG  
HFNFMNAPHMAHLGTLYGNGMQLPQFFPQYQMPMPQPPNKKHPQKPSASKQQSKTDPAP  
ESQKPNQPQKPTPTPKQPLNEPSPTPTQPEEETQTPQAFPPFGNGLFPYQQPLHVPHRIP  
PGYGRPPTSNEEGNPFYFGFFGYHGFGRPPYYSEEMFEQDFEKPKEDPKTETPATEP  
SVNTTVPETNSTQPNAPNPRGNDTSPTGTSGQGNPRSNPTGQNGPAVNVSGQGVPRSQS  
PGPRQTI IHENYPNPNI RGF PARRQRP GPAMPGRHRRNGPFYRNQQIQRGPRNSFTLEGKQ  
AVRPGYPTVRRVYGSTARSNPPNYAGNSANLRRKPEGPNKNPMVTNVAPPKPKHGTVDQN  
ENIQNPREQVSKERTVVPTRDPSGPRNSQDYGINKSNYKLPQPEDNMLVPNFNSIDQR  
ENSYYPRGESKRAPNSDGQTQTQIIPKGIVLEPRRIPYESETNQPELKHSAYQPVYTEGI  
PSPAKEHFAPAGRNTNQQEISPPFKEDPGRQEEHLPHLSHGRVHVYYPDYNPYDPRENSP  
YLRNNTYERDDSPNTMGQPENPHYPMNTPDPKETIPYNEEDPIDPTGDEHFPGQSRDMEE  
LSFKEDPTVRHYEGEQYTSNQPKYLPYSLDNPSKPREDFLYGEFYPNPEENFPSYNTAP  
TVSSPVESRGYANNVAVGQEESTMFPSSDPRIQAQGQKEGRPYLNRNFDQSTNLYKTPT  
SSPHQKENQPYSNNSPAGLQKNP THEGENLNYGMQITRLNSPERDHAFDLPDIPDPYGG  
QKESHV FHL SQRG PCCAGGSMKNNPLALQDYTQS FGLAPGENPDTSIGYAEDSHIKYAR  
QTVSPTSIVPGQRNSSEKILPGESQNPSPFKDDVSTLRRSTPCSVKSQLSQRGIMPLPEA  
NSLQSKNTPCLTSDLGGDGNVLEQIFEGNQLNERTVDLTPEQLVFGTDPKEPRPEGI PN

EMQGNESERQQQRQSSILQLPCFGSKLANYHTSSIGTPSSSLGRQDSFDGDPIMPTETPNS  
LAGLATGAQFQNIINVDPLENEDEHTPFDSLQIGTNPQDQVQDCLLLQA

>P00451

MQIELSTCFFLCLLRFCFSATTRYYLGAVELSDYMQSDLGELPVDARFPPRPVKSFFPNT  
SVVYKKTLEFVEFTDHLFNIAPRPPMGLLGPTIQAEVYDTVVITLKNMASHPVSLHAVGV  
SYKASEGAEYDDQTSQREKEDDKVFPGGSHTYVQVLKENGPMASDPLCLTYSYLSHVDLV  
KDLNSGLIGALLVCREGLAKEKTQTLHKFILLFAVFDEGKSHSETKNSLMQDRDAASAR  
APKMHTVNGYVNRSLPGLIGCHRKSVYHVIGMGTTPEVHSIFLEGHTFLVRNHRQASLEI  
SPITFLTAQTLMLDLGQFLLFCHISSHQHDGMEAYVKVDSCPEEPQLRMKNNEEAEDYDD  
DLTDSEMDVVRFDNNSPSFIQIRSVAKKHPKTVHYIAAEEEDDYAPLVLAPDDRSYKSQ  
YLNNGPQRIGRKYKVRFMAYTDETFKTREAIQHESGILGPLYGEVGDITLLIIFKNQAS  
RPYNIYPHGITDVRPLYSRRLPKGVKHLKDFPILPGEIFKYKTVTVEDGPTKSDPRCLTR  
YSSFFVNMERDLASGLIGPLLYCYKESVDQQRGNQIMSDKRNVLFSVFDENRSYLTENIQ  
RFLPNPAGVQLEDPEFQASNIMHSINGYVFDSLQLSVCLHEVAYYILSIGAQTDFLSVFF  
SGYTFKHKMVYEDTTLTFPFSGETVFMSEMPGLILGCHNSDFRNRGMTALLKVVSSCDKN  
TGDYEDSYEDISAYLLSKNNAIEPRSFQNSRHPSTRQKQFNATTIPENDIEKTDPFQAH  
RTPMPKIQNVSSDLLMLLRQSPTPHGLSLSLDLQEAKEYTFSDDPSPGAIDSNNSLSEMT  
HFRPQLHHSMDMVFTEPESGLQLRLNEKLGTTAATELKKLDFKVSSTSNLISTIPSDNLA  
AGTDNTSSLGPPSMPVHYDSQLDITLFGKKSSPLTESGGPLSLSEENNSKLLSGLMNS  
QESSGKNVSSSTESGRLFKGKRAHGPAALLTKDNALFKVVISLLKTNKTSNNSATNRKTHID  
GPSLLIENSPSVQNILESDETFKVTPLIHDRMLMDKNATALRLNHMSNKTTSSKNMEMV  
QQKKEGPIPPDAQNPDMSSFFKMLFLPESARIQRTHGKNSLNSGQGPSKQLVSLGPEKSV  
EGQNFLSEKNKVVGKGEFTKDVGLKEMVFPSSRNLFITNLDNLHENNTHNQEKIQEEI  
EKKETLIQENVVLPQIHTVTGTKNFMKNLFLSTRQNVESYDGAYAPVLQDFRSLNDST  
NRTKKHTAHFSKKGEEENLEGLGNQTKQIVEKYACTTRISPNTSQQNFVTQRSKRALKQF  
RLPLEETELEKRIIVDDTSTQSKNMKHLTPSTLTQIDYNEKEKGAITQSPLSDCLTRSHS  
IPQANRSPPIAKVSSFPSIRPIYLTRVLFQDNSSHLPAASYRKKDSGVQESSHFLQGAK  
KNNLSLAILTLEMTGDQREVGSLGTSATNSVTYKKVENTVLPKPDLPKTSKGVLELLPKVH  
IYQKDLFPTETSNGSPGHLDLVEGSLLOGTEGAIKNEANRPGKVPFLRVATESSAKTPSK  
LLDPLADNHYGTQIPKEEKSQEKSPKTAFFKKKDTILSLNACESNHAIAAINEGQNKPEI  
EVTAKQGRTERLCSQNPVLRHQREITRITLQSDQEEIDYDDTISVEMKKEDFDIYDED  
ENQSPRSFQKKTRHYFIAAVERLDYGMSSSPHVLNRNAQSGSVPQFKKVVFQEFQDGSFT  
QPLYRGELNEHLGLLGPYIRAEVEDNIMVTFRNQASRPYSFYSSLI SYEEDQRQGAEPK  
NFVKPNETKTYFKVQHMAPTKDEFDCKAAYFSDVDLEKDVHSGLIGPLLVCHTNTLNPA  
HGRQVTVQEFALFFTFIDETKSYFTENMERNCRAPCNIQMEDPTFKENYRFHAINGYIMD  
TLPGLVMAQDQRIRYLLSMGSNENIHSIHFSGHVFTVRKKEEYKMALYNLYPGVFETVEM  
LPSKAGIRVECLIGEHLHAGMSTFLVYSNKCQTPMGASGHIRDFQITASGQYQAPKL  
ARLHYSGSINASTKEPFSIKVDLLAPMIHGIKTQGARQKFSSLYISQFIMYSLDGKKQ  
TYRGNSTGTLMVFFGNVDSSGIKHNI FNPP I IARYIRLHPHYSIRSTLRMELMGCDLNS  
CSMPLGMESKAISDAQITASSYFTNMFATSPSKARLHLQGRSNARPQVNNPKELQVDFQK  
TMKVTGVTTQGVKSLTSMYVKEFLISSQDGHQTLFFQNGKVKVFQGNQDSFTPVVNSL  
DPPLLTRYLRIHPQSVHQIALRMEVLGCEAQDLY

>P00730

MQGLLILSVLLGAALGKEDFVGHQVLRITAADAEVQTVKELEDLEHLQLDFRGPQPGS

PIDVRVPFPSLQAVKVFLEAHGIRYRIMIEDVQSLLDDEEQMFASQSRARSTNTFNAT  
YHTLDEIYDFMDLLVAEHPQLVSKLQIGRSYEGRPYVLKFKSTGGSNRPAIIDLGIHSRE  
ITQATGVFAKKFTEDYGDPSFTAILDSMDIFLEIVTNPDGFAFTHSQNRLRKRTRSVTSS  
SLCVGVDANRNDAGFGKAGASSSPCSEYHGYANSEVEVKSIVDFVKDHGNFKAFLSIH  
SYSQLLLYPYGYTTQSIIPDKTELNQVAKSAVEALKSLYGTSYKYGSIITTIYQASGGSID  
SYNQGIKYSFTFELRDTGRYGFLLPASQIIPTAQETLGVLTIMEHTLNNLY

>P00734

MAHVRGLQLPGCLALAAALCSLVHSQHVFLAPQQARSLLRVRRANTFLEEVKGNLEREC  
VEETCSYEEAFEALESSTATDVFAKYTACETARTPRDKLAACLEGNCAEGLGTNYRGHVN  
ITRSGIECQLRSRYPHKPEINSTTHPGADLQENFCRNPDSSTGPCYTTDPTVRRQECI  
PVCQGQDQVTVAMTPRSESSVNLSPPLEQCVPDRGQQYQGR LAVTTHGLPCLAASAQAKA  
LSKHQDFNSAVQLVENFCRNPDGDEEGVCYVAGKPGDFGYCDLNYCEEAVEEETGDGLDE  
DSDRAIEGRTATSEYQTFNPRFTFGSGEADCLRPLFEKKSLEDKTERELLESYIDGRIV  
EGSDAEIGMSPQVMLFRKSPQELLCGASLISDRVLTAAHCLLYPPDKNFTENDLLVRIGK  
HSRTRYERNIEKISMLEKIYIHPRYNRENLDRIALMKLKKPVAFSDYIHPVCLPDRETA  
ASLLQAGYKGRVTGGNLKETTANVGKGQPSVLQVVNLPIVERPVCKDSTRIRITDNMFCA  
GYKPDEGKRGDACEGDSGGPFVMKSPFNRYQMGIVSGEGCDRDGKYGFYTHVFRLLKIQ  
KVIDQFGE

>P00735

MARVRGPRLPGCLALAAALFSLVHSQHVFLAHQQASSLLQRARRANKGFLEEVKGNLERE  
CLEEPCSREEAFEALESLSATDAFAKYTACESARNPREKLNCELEGNCAEGVMNYRGNV  
SVTRSGIECQLRSRYPHKPEINSTTHPGADLRENFCRNPDGSIITGPCYTTSPTLRREECI  
VPVCGQDRVTVEVI PRSGGSTTSQSPLLETCVPDRGREYRGLAVTTSGSRCLASSEQAK  
ALSKDQDFNPAVPLAENFCRNPDGDEEGACYVADQPGDFEYCDLNYCEEPVDGDLGDRLG  
EDPDPDAAIEGRTSEDFHQPFFNEKTFGAGEADCLRPLFEKKQVQDQTEKELFESYIEG  
RIVEGQDAEVGLSPQVMLFRKSPQELLCGASLISDRVLTAAHCLLYPPDKNFTVDDLLVR  
IGKHSRTRYERKVEKISM LDKIYIHPRYNKENLDRIALLKLRPIELSDYIHPVCLPDK  
QTAALKLLHAGFKGRVTGGNRRETTTVAEVQPSVLQVVNLPLVERPVCKASTRIRITDNM  
FCAGYKPGEGKRGDACEGDSGGPFVMKSPYNNRYQMGIVSGEGCDRDGKYGFYTHVFRLLK  
KIQKVIDRLGS

>P00750

MDAMKRGLCCVLLLCGAVFVSPSQEIHARFRRGARSYQVICRDEKTQMIYQQHQSLRPVL  
RSNRVEYCCNSGRAQCHSVPVKSCSEPRCFNGGTCQQALYFSDFVCQCPGEFAGKCEID  
TRATCYEDQGISYRGSTAESGAECTNNSALAQPKYSGRRPDAIRLGLGNHNYCRNPDR  
DSKPCYVFKAGKYSSEFCSTPACSEGNSDCYFGNGSAYRGTHSLTESGASCLPNSMILIG  
KVYTAQNPSAQALGLGKHNYCRNPDGDAKPCHVLKNRRLTEYCDVPSCSTCGLRQYSQPQ  
FRIGGLFADIASHPQAAIFAKHRRSPGERFLCGGILISSCILSAAHCFQERFPPHLLTV  
ILGRTYRVVPGEEEQKFEVEKYIVHKEFDDTYDN DIALQLKSDSSRCAQESSVVRTVC  
LPPADLQLPDTECELSGYGKHEALSPFYSERLKEAHVRLYPSSRCTSQHLLNRTVTDNML  
CAGDTRSGGPQANLHDACQGDSSGGLVCLNDGRMTLVGIISGLGCGQKDVPGVYTKVTNY  
LDIRDNMRP

>P00760

MKTFIFLALLGAAVAFVDDDDKIVGGYTCGANTVPYQVSLNSGYHFCGGSLINSQVVSA  
AHCYKSGIQVRLGEDNINVEGNEQFISASKSIVHPSYNSNTLNNDIMLIKLSAASLNS

RVASISLPTSCASAGTQCLISGGNTKSSGTSYPDVLKCLKAPILSDSSCKSAYPGQITSN  
MFCAGYLEGGKDSCQGDSGGPVVCSGKLQGI VSGSGCAQKNKPGVYTKVCNYVSIKQ TIA  
SN

>P00762

MSALLILALVGAAVAFPLEDDDKIVGGYTCPEHSVPYQVSLNSGYHFCGGSLINDQVVSA  
AHCYKSRIQVRLGEHNINVLEGDEQFINAAKIIKHPNYSSTLNNDIMLIKLSPPVKLNAR  
VAPVALPSACAPAGTQCLISGGNTLSNGVNNPDLLQCV DAPVLSQADCEAAYPGEITSSM  
ICVGFLEGGKDSCQGDSGGPVVCSGKLQGI VSGYGCALPDNPGVYTKVCN FVGIQDTIAA  
N

>P00763

MRALLFLALVGAAVAFVDDDDKIVGGYTCQENSVPYQVSLNSGYHFCGGSLINDQVVSA  
AHCYKSRIQVRLGEHNINVLEGNEQFVNAAKIIKHPNFDRKTLNNDIMLIKLSPPVKLNA  
RVATVALPSSCAPAGTQCLISGGNTLSNGVNEPDLLQCLDAPLLPQADCEASYPGKITDN  
MVCVGFLEGGKDSCQGDSGGPVVCSGKLQGI VSGYGCALPDNPGVYTKVCN YVDIQDTIAA  
AN

>P00764

APDDDDKIVGGYECPKHAAPT VSLNVGYHFCGGSLIAPGVVSAAHCYQRRIQVRLGEHDI  
SANEGDETYIDSSM VIRHPNYSYDLDNDIMLIKLSKPAALNRNVDLISLPTGCAYAGEM  
CLISGGNTMDGAVSGDQLQCLDAPVLSDAECKGAYPGMITNNMCMVGYMEGGKDSCQGD  
GGPVVCSGKLQGI VSGYGCALPDNPGVYTRVCHYVSIHETIASV

>P00765

IVGGTDAVLGEFFPYQLSFQETFLGFSFHFCGAS IYNENYAITAGHCVYGGDYENPSGLQI  
VAGELDMSVNEGSEQTITVSKII LHENFDYDLLNDISLLKLSGSLTFNNNVAPIALPAQ  
GHTATGNVIVTGGTTSEGGNTPDVLQKVTVPLVSDAECRDDYGADEIFDSMICAGVPEGG  
KDSCQGDSSGGLAASDTGSTYLAGI VSGYGCALPDNPGVYTRVCHYVSIHETIASV

>P00768

IVGGTNAPRGKYPYQVSLRAPKHFCGGSISKRYVLTAAHCLVGKSEHQVTVGSVLLNKEE  
AVYNAKELIVNKNYSIRLINDIGLIRVSKDISFTQLVQPVKLPVSNTIKAGDPVVL TGG  
RIYVNGPIPNNLQQITLSIVNQQTCKSKHGLTDSQICTFTRKREGACHGDSGGPLVANGV  
QIGIVSYGHPCAIGSPNVFTRVYSFLDIQKNQL

>P00769

IVGGTDAPRGKYPYQVSLRAPKHFCGGSISKRYVLTAAHCLVGKSKHQVTVHAGSVLLNK  
EEAVYNAEELIVNKNYSIRLINDIGLIRVSKDISYQLVQPVKLPVSNTIKAGDPVVL T  
GGRIYVNGPIPNNLQQITLSIVNQQTCKFKHGLTDSQICTFTRKREGACHGDSGGPLVAN  
GVQIGIVSYGHPCAIGSPNVFTRVYSFLDIQKNQL

### (5) 30 Golgi apparatus proteins

>A0AAS4

MSASTMKEVVYSPKKVADLLENAMPEYCEPLEHFTGRDLINLTQEDFTKPPLCRVSSDNG  
QRLLDMIETLKMEEHMEAHKNGHANGHLSIGTDVPAPDGSFSIKVKPNGMPNGYRKEMIK  
IPMEPEPERSQYPMEGKTFLAFLYALSCFVLTVMISVHERVPPKEVQPPLPD TFFDHFN  
RVQAFSICEINGMILVGLLIQLLLKYKSIISRFFCIVGTLYLYRCITMYVTTLVPVGMH  
FNCSPKLFGDEAQLRRIMKLIAGGGLSITGSHNMCGDYLYSGHTVMLTLTYLFIKEYSPR  
RLYHICLLSVVGIFCILLAHDHYTVDVVVAYYITTRLFYHTMANQQVLKEASQMNLLARV  
YRPFQYFEKNVQGI VPRSYHPPVHLGRQVKYSRLVNDT

>A0M8S7

MSGGKYVDSEGHLYTVPIREQNIIKPNKAMAEINEKQVYDAHTKEIDLVRDPKHLN  
DDVVKIDFEDVIAEPEGTHSFDGIKASFTTFTVTKYFYRLLSALFGIPMALIGIYFAILS  
FLHIAVVPCKIKSFLIEIQICISRVYSIYVHTFCDFPFEEAVGKIFSNIRINMQKEI

>A1C8D8

MISRLLLIIGLLALALFSQPCATEKAEPQINSTPFDEHPFFMSYFEDSDTILMLTTQRNLF  
RSFDGGKGERVDDMDGKMKQHVVSVLQHPSPDKDKAYALGSKGRHITTDRAKTNAFTIHQS  
PAIQHEPLVDFHGDGSKVIFQTDDECIGTFCIVKSYTTDDFKTVSPLRVSAGGCAAVGHPQ  
FAEGLNLEDQIRNRVLCVVSGLKVPAPYANRLVYSDDFFSNEADGAEMNLHQGRPVSGVQ  
TTAAVKKFLVAAVKSQGTDEMALYVTLDTKVHRADFGGHRVEQDAYTVLESTNYSMQVDV  
LTDQSSMTGVLFTSNSNGTYFTRNVEHTNRDRFGHVDFEKIADIQGIIVLVNTVSNKKLES  
DHRKKIVSEVSFDDGRTFQPLTVGDKHLHLHSVTTYANTGRVFSSPAPGVVMGVGNKGDH  
LKEYSECDLYVSDDAGVTRHALDGPFKYEFQDQGAIVAVSDKKGKIGEKYSTDHGKEHT  
AKLQHEIFPKMLTTTPDSTSMKFLVVGSKESTGDGFFVYSIDFGSLHGRKCEKDDFEKPA  
RLNEDGEPCDLMGHKQFFNRRKANADCFMDEEFKDPQPIFEPCCKCTAEDYECDFNVRSE  
DGKSCPLPAAPLVPPAGKCREKTDKFGYGPSGRLIPGNCCIIEGGENLDKDIERTCEDTNGS  
PETHMSHKQVFDNSKQFSGQYFYLERQASSGNDETVMMLTREREFVSHDHGKKEQPLKG  
VQIVAIIPHPYSDGAFLLTGGQEAFTVDRAITFKSFKVPIPPTRDDMPVFSFHPQYKDL  
ITGAVDCGHGDCHSDAYITKNRGKDDLLRYVGKCEFESRKNRPDSENLI FCEQYANENK  
NNHKQLSSDSFFADSHVHFDNEARYATMSEYIIVASHDPNNANSLIASVSVDGKTFAEA  
KFPNVDVVPKTAFTVLDSSSTHAVFLHLMGVKGAEYGSIIKSNNGTLYTVSLNAASR  
DDRGFVDYKMQGLEGVAVANVISNVDTVLKKGAAAKKVKTKITHNDGGQMLLPPPAKDA  
EGKDFGCSNKDGKASDKCSLHLHGYTERDSRDTFSSGSAIGLMMGVGNVGDHLTSKEEAD  
TFMTRDGGITKPIKKGRIEYGDGSGSVIVIVPESRPTKILHYSLDEGDSNFKFSVDVDM  
IHLRSTLPSDTSKNFLLGKEQDSNQLATVNVDFSSSLREASCKLVEDGQDSDDYYLEPKHP  
LQEDNCLFGHIEQYHRKKLAANCNNREPHVHSIGKNCTCTRADYECDFNYEPQSDGSCAL  
VPGLPKPDASIVCKEDPKIEYPELLLGYYRIPQTTCMGGEPPVVFVKPCPGKEKEYKKKH  
SISGIGLFFAIVTPIAMASAAGYVYTRDGKFGQIRLGEDIGGREAILSRSPLVAVPIA  
IIAGVVAVLKALPLLAISLRSSSSFIRTRRDRAISRPYASRGSFAARRGDYTSVVDEDE  
LLGVEDGEAEGEDEEEL

>A1DAY6

MITRLLITSFLALAILSLSSAAKSEPEITPSSFDNEPFSLFYFEDTETILMNTRDGNLF  
RSFDGGKGEQVDDPNGKMKKGVRSIQHPFDKNRAYALGANRRHVTKDQAKTESFEVDGYA  
ATQHEPLIFHGDSSKVIQFQSDCEMGRFCIVKSYSTDDFKTVSPLRVSAGGCAAVGHPQF  
AEGNLEDELDRVLCIVPGLKVP SAHANRLVYSDDFFRSDAEGTELNIQQGRPVSGILS  
AAAVKKFFVTAAKSQGTNELALYVTLDTKAHRADFGGHRVEQDGYTLLESTNYSMQVDVL  
TSPSSNTGILFTSNSNGTYFTRNVEHTNRDRFGHVDFEKIADIQGIIVLVNTVKNDKVGSE  
NEKKVSSISFDDGRTFQSLKVGDKQLHLHSVTTFANTGRVFSSPAPGLVMGVGNTGDHL  
KKYSEGLYVSDDAGVTRHALDGPFKYEFQDQGSVIMAVSDKGTTEIQFSIDHGKEHST  
KLQHKIYPKLLTTTPDSTSLTFLLVGSEESSGTKHVYYSIDFRGLHERKCEKDDFEKAAR  
LNENGEPCDLMGHQFFNRRKANADCFVDEEFKDPQPIFEPCCKCSFEDFECDNFVRSERD  
GKSCVPAAPLVPPVGRQCQKQTDTFMGPSGRLIPGNCTTREGGENLDKDVVERPCKDVVSAP  
SHDKLMAQKQVFNDARQFSEQYFYLERQASSSGDDETVMMLTSEGEFVSHDHGKNEQPLK  
GVKIAAIVHPYSDGAFLLTRDKQEAFTVDRAITFKSFEAPIPPNQEGLPVLSFHPQYKD

LITGAVDCAHGDCHSDAYFSKNRGENDLLLRVVGKCEFESRENRPGSEKLI FCQQYENEN  
KKNHLQLLSSENLFSDSHVHFNDAIRYATMSEYIIVASRDPDNPDSLVASVSDGRTFAR  
AEFPPNVDVPVKTAFTVLDSSTHAVFLHVTVSDVKGAEHGSIKSNNSNGTSYVLSLNAAS  
RNEGyvDFEKMQLEGVAVVNIISNVEAVLKKGPTAKKLKTMITHNDGGQMLLPPPAKDA  
DGKNFGCSVKGGKSGQCSLHLHGyTERRDPRDTFSSGSAIGLMMGIGNVGAHLSGKDEA  
DTFMTRDGGITKSVKKGRyMEYGDsgsvivivPELRPTKVLyYSLDEGDNEPyeFSEVEM  
HIYRLSTVPSDTSKNFLLGKEVESNRLATINVDfSGLRKKSCNLVENgQESDDyYLEPKH  
PFQEDNCLFGHVEQYHRKKPSSQCNNREPHVHSIGRNCTCTRADyECNynYEPQNDGSCA  
LVPGLPKPDALAVCREDPDRVEYEPTAYRRIPQTTcAGGLILDHVvSKPCPSKEKEYEKK  
HGISGTGLFFAIMIPIVAAAGVGYVYAKDGKFGQIRLGENAGTYEGLLSRESPIVTVPI  
AVIAGIVAVIRALPLLAMSLRSASGYVRLGRNRAYSrPYASRGsFAARRGDYTSVVDDed  
ELLGvDDAEIDeDDEL

>A1IGX5

MGTMASPLFILIAcLLSMRVGGAffAGPLYPEMSNGTFHHyFVPDGYyEENDDPEKcQML  
FKMMDNRKCTLDEDQDSVIRDDFTIKRHIEDAARVLEGIgKSI SFDLGDgEDSYGKYLRr  
ETTQISEAFSnsEKSLLELEVkFKQSQENELKEEHKISDDFLNMIVHTRDVLKETLDISL  
GLKDKHELLSLIIRSHGTRLSRLKNDyMKV

>A1L2S8

MGLCKCpKRKVTNlFCFEHRVNVCEHCLVANHAKCIVQSYLQLQDSyDYNpNCRLCNTLLS  
SKETARLVcyDLfHsCLNDLATQQPPNTAPAGyRCPSCQGPVFPNNLVSPVAATLREKL  
STVNARAGLGLPLIEVAEPVDDTMSHDETDYRDSVNVNssDNLSETPETTSQTYNSV  
APGAVQQSLNGNMSQDHAVTIRDTGSESVPFNAASSPRKVYDTRENARGQDAVIDFDDDK  
YRRRPTLNlARILRNRSgSKSRPASSMQRFVLILIGVLGFLTLILLMSKLGRASADNDP  
NLDPLLNPHIHVgKE

>A1X149

MSGGKYVDSEGHLYTLPIREQGNiYKPNnkAMAEDMNEKQVYDAHTKEIDLvNRDPKHLN  
DDVVKIDfEDVIAEPEgTHSFDGIKASFTTFTVTKyFYRLLSGIFGIPMALIGVYFAILS  
FLHIAVVPcIKSFLIEIQcISRvYSIyVHTfCDPLFEaIGKIFSNIRISTQKEI

>A1YGR5

MNVKGNVILSMLAVSTVIAVFEYINSPEGSFLIyHsKNPEADDSSAQKGFPGFNNGIHNY  
QQQEEDTDKEKGEKQEKEDDTQLLDFNPkRPEVVTvTKKAPVVEGTYNKAILENyY  
AKQKITVGLMVFAIGRYIEHYLEEFITSANRYFMVGHKVI FYVMVDDVPKVPFIELGPLR  
SFKVFEVKPEKRQDICMMSMKTIgEHILAHIQHEVDFLFCMDVDQVFQDHFGVETLGQSV  
AQLQAYKVDpDDFTYERRKESAAYIPFGQGDfYyAAIFGGTPIQVLSITQECFKGILLD  
KKNDIEAEHDESHLNKYFLLNKPSKILSPEYCDYHIGLPSDIKTVKLPQTKEYNLVRNNV

>A1YGR6

MNVK GKAIL SMLVASTVIVVFEYINSSEGSFLIyHsKNPEVGDVRAPMGFPsFNNGTHIY  
QEEEEEDVDKEKGRKKEQREKDDREELQLDFTPEKRPEVVTvTSKAPVVEGTYNsAILENy  
YAKQKITVGLTVFAIGKYLEYyLEEFIASADRYFMVGHKVI FYIMVNNVSRMPPELGLPL  
RSFEVFEIKAEKRQDVSMRMKIIGEHILTHIQHEVDFLFCMDVDQVFQDNFGVETLGES  
VAQLQAYKADPNefTYERREKSAAYIPFGQGDfYyAAIFGGTPIRVLNITQECFKGILQ  
DKNDIEANHDESHLNKYFLVNKPSKILSPEYCDYQIGLPSDIKIVKISQTKeyHLVRNN  
V

>A2QHH4

MIFRLLLVSCLLVALIPQQSSAKKSDQPKVTATKLEHEPFSLFYFEDSETVLMMLKNGEF  
KQSFDDGEEEDVASSEDGRVTQPVVVFIRQHPFDKNKAYALGVDGHHLVTTDQAKTRSFDI  
GDQPALQHPPLVVFHGDSSKVIYQSEECAGFFCITVRLRESAAGCSAVGHPHFAEDMDLN  
QELKDRSLCVVPLKVPFGHANRLVYSDDYFVSNIEGTEVNLHEGRPVSGVISTA AVKKEF  
IVAAVSKSGTEELALFVTTDTNTHRAEFDGHRIEQDAYTMLESTNYSLQVDVLTSPSSNM  
GVLFTSNSNGTFFSRNIEHTNRDMEGTVD FEKIAGIQGIVMVNTVKNPKEVKSGQAKKVI  
SRISFDDGRSFQPLKVGDKNLHLHSVTTFANIGRVFSSPAPGLVMGIGNTGDHLQKYS DG  
DLYISDDAGVTRHALDGP HKYEFGDQGAVVMAISDKGKSNKISFSLDHGKEGSVEIEH KI  
YPTMVTTPDSTSLRFLLVGKQNEESGFIVYSIDFKGLHERKCEEDDFEKPARLDENGE P  
DCLMGHKQFFRRRANADCFVDEEFKDPQPI MEPCKCTAEDFECEFKGSE DGKSCIPALL  
PVPPEGCKNPDDTFMGPSGRLIPGDT CIRDDGGKNLDHDVERCKDAGNVPTSGEISVEKQY  
FDARQFSAYYYLERQSSSSGNDETIVMLT SERALYVSHDHGKTKQPLKGEAINRIVPHPY  
NSDGAFLLLTDGAEGFTVDRGQSFKPF DAPAPPTEERLPTLTFHPQYQDLITGAVDCGSGD  
CHSNAYISKNRGDNELLQRYVQKCEFESREGRKDSTNLI FCEQFENENRNNRLQLVSSKN  
FSDSTVHFRDVINYATMSEFIVVASRDTEKPD SLVASSSVDGETFAEAKFPPNVNVPVQT  
AYTVLESSTHAVFLHVTVSNSEGAEYGSIIKSN SNGTSYVLSLGAVNRNFRGYVDFEKMQ  
GIEGVAVANVVS NVNKLSDGEPKCLRMTI THNDGGQTLLSPPNKDAEGKDFGCSVEGEGV  
PGCSLHLHGYTERRDERDTFSSSSAIGLMLGVGNVDHLGGEDEADTFITRDAGFTKSVK  
KGRYIEFGDAGSLIVIVPESKPTKTL YYSLDEGDTLDFVFSVEMQIDDISTVPSDTSKS  
FLLGKELKSDYQDKLATVSVDFSGLRSSSCKLDENSAESHDYYLEPKHPFQSDNCLFGHV  
EQYHRKKPSAQCNDRPHVHSIGENC PCTRADFECDYNYEPQSDGSCALVQGLAPPDAMA  
VCREDPEAYQYEPSGYRRLPQSTCQGGREMDHIVSKPCPNRE EYKHKHGISGAGLFFAI  
VIPIAVASAVGGYGYTRDGKFGQIRLGENV GTSQGLLSRDSLLITIPVTIIAGAVAVIKA  
LPLLATSLRSASGYVRLGRNRGYSR PYASRGSFAARRGDYTG VVDEDELLGVEDLEADE  
EDEL

>A2RUV4

MATRRATVPEQQQQQPSSPGSEISK NKDGQEQSEMVSPT EEEGFCPGPKSVALRRASEGF  
GFTLRHFIVYPPESAVHTTVKDEENGRGVNAGRPRNRLEPMDTIFVKQVKEGGAHEAG  
LCTGDRIIKVNGESVIGKTYSQVIALIQNS DSTLELSVMPKDEDILQLAYSQDAYLKGND  
SYSGNAQNIPEPPPICYPRTKPAASVMAQPVEVPPSGTSLTKQQSSRPVRTATTQ PDRSY  
RVEIQVPPSPTDIVKSNTAVCVCNEAVRTVILPSEKVV DLSSNRTNRAGPLHRTEEVRYG  
LADPSMLKRRTTSPSSSTPSVPMVPASRQFDNAGVIGKPPSYGGHSESMFSTRPSQAEESP  
SPTNHYASPGSHQQIDRNYKTYKEYIDNR RMQMYGCRTIQRERLDSLRAASQNTTDYDQML  
PNRSSGQVRRRSTSHDRVPQSVQMRQRSV SQRERLEDPVLMKEPRSASQDTLTLTVAPRN  
HRSESDYLTRKEDFDQFIVDTQSNGEQKHNYKTGFTEQDDQRGIYEIPRQHSFHMSLRSP  
NYTMAPLPYPSDSRRAGTRVLAPARPLQKVHPDLKTIQPTRNFQNSYRSPHPRPAV SERL  
VFPISKSN SVKIPATYASKPYSPSVGSEDGIVKDQKAVNYIHVSGPQNFQRKPQTESALG  
FQLDSLKTSTSSASSSSPAHTKPAKQAKHSTATSQNV DGKKTQSPEANAGDSNSVLTSIDQ  
VVLREKPSPGQQT SQPIRQPSYIFAVSDVEGASDTTCLPNDARREVHIKRIEQKKASGSD  
SPGDSLASIPFIDEPTSPSIDHEIANIPASAVISISVQPLPTITTVPPSPTSPVPLIRRH  
FSHDHDSIRPSILEVNSKTERS KSCDEGLDDYKDEGKLSLKQGSSSLKGIKARENVPSS ED  
SESRKDS SSDVFSNKEGFLYFRQLTTEKGRVSGSMRPKQMYVVL RGSALYLQKDKKE  
QSGHSSAQSD EEQLIGINGCLIDISYSETKRKNVFRLLTTS DREFLFQAEDRDDMLAIKAI  
QENGNLND EQTDQASRVLISKRIKEYNTMMSSSSNKSEQSPKPSRQTL SIRQPFRATKPE



GKLQSPHSPKQESERRLFSKDDISPPKDKGSRRIMKKPFEEKPTTGGTFGVRLDDCPPAH  
NNKYVPLIVDVCCKLVEDRGLTETGIYRVPGNNAAISSMQEELNKGSTDIDIQDDKRDLN  
VISSLLKSFFRKLDPDLFTNEKYNDFIEANRTEDPVERLKTLLKRLIILDLPDHHYETLKYL  
SAHLKAVAENSEKNKMEPRNLAIIVFGPTLVRTSEDNMTHMVTHMPDQYKIVETLIQQHDF  
FSEESADEPITAVQEESTVESQPVPNIDHLLPNIGRTGLSPGDVSDSASDSAKSKGSGSG  
KDQYSRELLVSSLFAAASRKRKKQRDKPQPSSSEDELNDNVFYQKELLQVEFQRPDKQNV  
KDVDLKANALSLKDADNIKGTNI IKEDKLEKDIMHSEATSPCPPKLEPPIVNHRLPPDD  
KNIPQISFQMEESMSDSGTMLSTSSQASAQRSKPKVVSPELKGSDFLTADVSSITSDYST  
TSSTIYIVGLDQNLISPEVQSVAESKGEAEADDERSELI SEGRPMETDSENDPPI FASSIA  
FDRQHRKSKVEEPTNRVQVNSEGSPTSCTEGSITPRMDRRRFSHKLIECDTLRKKKSIRQK  
TDSECSAESKNEETLSDAQEAVKGRSLSIGDTTNNPEEPARIKITERLKLRLKASAD  
DMFGIGSQKAQAAETRKKKNIRRRHTLGGQRDAEISVLNAKINEPSSKEAELSAVDRK  
PKCPSQDLSISDLARERLRTSTSELSMVEPEEKRISDATSQKEPASPPPASSPSQVST  
AIVTAGSESPSQGTAPPDDQMNGDSFQSKNKNFSPAVIDAHPHKLSGTQVVRSRFYQYL  
>A2VDR8

MDFSKFLAEDFDVKEINAAFRAGPKEAAAGKADSHAATLVMKLQLFIQEVNHAVEETS HQ  
ALQNMPKVLRDVEALKQEASFLKEQMILVKEDIKKFEQDTSQSMQVLVEIDQVKSRLMQLA  
AESLQEADKSTLSADIEETFKTQDIAVISAKLTGMQNSLMLLVDPDYSEKCVHLEALKN  
RLEALASPQIVAAFTSQSIDQSKMFVKVFSEIDRMPQLLAYYKCHKVQLLAAQELCQTD  
LPLDRQLTGLYDALLGAHAQIQASQVFNPHDVVTVLLIQTGLALVPSLPVCLSSGVERA  
GPELELVKLLLEFYDATAHFAKGLEMALLPHAYEQNLVKVMELVDVAVGYPYQPKYQKYGDM  
EEKYLLIQFSEVPLEHGEVIDCVQELSHSVNKLFGLSAAVDR CIRFTSGLGTCGLLTAL  
KSLFAKYVSDFTSTLHSIRKKYRLDDIPLNSLFQEDTAFQNSIRIIATCGELLRQCGDFE  
QQLANRILSTAGKYLSDFSFRSLTGFQDSILTDKKSSAKNPQEYNYLQKDS PAEYGS LM  
EILYTLKEKGSNNHLLSASRSALTRLNQQAHQLAFDSVFLRIKQQLLLIPKMDSNTAGI  
GETLTDDLPTFSLTPLEYISNIGQYIMSLPLNLEPFVTQEDSALELALHAGKLPFPPEQG  
DELPELDNMADNLGSIARATMQTYCDAILQIPELTPHSTKQLATDIDYLINVMDALGLQP  
SRTLQNIIVMLLKAKPEDYRQVSKGLPRRLATTVATMRSVDY  
>A2YCI3

MSGDYANYTVLMPPTPDNQPSGGAPPAAPSAGGARPGDLPLPPYGSSSSSRLVNRGGGD  
DGAKMDRRLSTARVPAPSSNKSLLVRSQTGDFDHNRLFETKGTYGIGNAYPQDNVYGDDG  
GGGAVKMEDLVEKPKPLSRKVPIPPGILSPYRLVLVRFVALFLFLVVRTNPNMDALLGI  
SIVCEFFAFSLLDQMPKLNPIINRAADLAALKEKFESPSPTNPTGRSDLPLGLDVFI STADP  
YKEPTLV TANTLLSILATEYPVEKLFVYISDDGGALLTFESMAEACAFKVVFPCKHSI  
EPRNPDSYFTQKGDPTKGGKRPDFVKDRRIKREYDEFKIRVNSLPDLIRRRANALNARER  
KLARDKQAAGDADALASVKAATMADGTHPGTLDPSPDHAKGDHASIVQVMIKNPHHDVVY  
GEAGDHPYLDMTDVMRIPMFAYLSREKRAGYDHNKKAGAMNAMVRASAILSNPFPMLNF  
DCDHYIYNCQAIREAMCYMLDRGGDRICYIQFPQRFEGIDPSDRYANHNTVFFDGNMRAL  
DGLQGPMYVGTGCLFRRYAIYGFNPPRAIEYRGTYGQTKVPIDPRQGSEAMPGAGGGRSG  
GGSVGGDELQALSTAHPDHEAPQKFGKSKMFIESI AVAEYQGRPLQDHPVNLNRRPPGA  
LLMPRPPLDAATVAESVSVISCYEDNTEGQRVGIYGSVTEDEVVTGYRMHNRGRSVYCI TR  
RDAFRGTAPINLTDRLHQVLRATGSVEIFFSKNNAVLASRRLKFLQRMAYLNVGIYPFTS  
LFLIMYCLLPALS LFSGQFIVATLDPTFLSYLLLITITLMLLCLLEVKSGIGLEERNEQF  
VIGGSAHLAAVLQGLLKVVAGIEISFTLTAKAAAEDDDDPFAELYLIKTS LFIPPLAVI

GINIIALVVGVSRTVYAEIPQYSKLLGGGFFSFVLAHYYPFAKGLMGRRGRTPPTIVYVAG  
LISITVSLITISPPDDSSVAQGGIDV

>A2YHR9

MAPSGFAASRPALAAAAAGGTPVVVKMDNPNSISEIDADGGEFLAGRRRGRGKNAKQIT  
VLLKKAHRAAGCLALASAAVALGAAARRRVAAGRTDDADAETPAPRSRLYAFIRASLLLS  
VFLLAVELAAHANGRGRVLAASVDSFHSVRFRAAYVAPPLQLLADACVVLFLVQSADR  
VQCLGCLYIHLNRIKPKPISSPAAAAALPDLEDPDAGDYYPMLVQIPMCNEKEVYQQS  
IAAVCNLDPRSNIQVLDSDDPITQSLIKEEVEKRQNGARIVYRHRVLRREGYKAGNLK  
SAMSCSYVKDYEYVAIFDADFQYPDFLKRTPHFKDNEELGLVQARSFVNKDENLLTRL  
QNINLCFHFEVEQQVNGIFINFFGFNGTAGVRIKALEDSGGMERTTVEDMDIAVRAHLNG  
KFVFLNDVECQCELPESYEAYRKQQRHSGPMQLFRLCLPDIIRCKIAFKKANLIFLFFL  
LRKLILPFYSFTLFCIILPMTMFIPEAELPDVVCYIPALMSFLNILPAPKSFPIIPYLL  
FENTMSVTKFNAMISGLFQLGSAYEVVTKKSGRSSEGDIALAPKELKQQKILDLTAIKE  
QSMKQSSPRNEAKKYNRIYKKELELALLLLTAAARSLLSKQGIHFYFLMFQGLSFLLV  
GLDLIGEDVK

>A2YU42

MASNGGGGLRHSNSRSLSRMSYSGEDGRSQAPGGGGDRPMVTFARRTHSGRYVSYSRDDL  
DSELGNSGDMSPESGQEFNLNYHVTIPATPDNQMPDPAISARVEEQYVSNSLFTGGFNSVT  
RAHLMKVIESEASHPQMAGAKGSSCAINGCDKVMSEDERGDDILPCECDFKICADCAD  
AVKNGGACPGCKDPYKATELDDVVGARPTLSLPPPPGGLPASRMERRLSIMRSQKAMTRS  
QTGDDHNRLEFETKGTGYGNAIPKENEVDNGGGGGGGGGGGGGQPAEFTSKPRPLTRK  
LKI PAGVLSPYRLLILIRMAVLGLFLARIKHKNEAMLGMSVVCFLGLSLLDQLPKLCP  
VNRATDLAVLKDKFETPTPSNPNGRSDLPLGLDIFVSTADPEKEPPLVTANTILSILAADY  
PVEKLSYVSDDGALLTFEAMAEASFANMVPFCRKHDI EPRNPESYFNLRDPYKNKV  
RSDVFKDRRRVKREYDEFKVRINSLPDSIRRRSDAYHAREEIKAMKRQREAAALDDVVEAV  
KIPKATMADGTHPGTIQPSAEHARGDHAGIQVMLKPPSDDPLYGTSSEEGRPLDFTEVD  
IRLPLVYVSREKRPYDHNKKAGAMNALVRSSAVMSNGPFI LNLD CDHYVYNSQAFREG  
MCFMMDRGGDRIGYVQFPQRFEGIDPSDRYANHNTVFFDVNMRALDGMGPVYVGTGCLF  
RRIALYGFDPPRSKEHSGCCSCCFPQRRKVKTSTVASEERQALRMADFDDEEMNMSQFPK  
KFGNSNFLINSIPIAEFQGRPLADHPGVKNGRPPGALTVPRDLLDASTVAEASVISCYE  
DKTEGQRVGIYGSVTEDEVVTGYRMHNRGKSVYCVTKRDAFRGTAPINLTDRLHQVLRATG  
SVEIFFSRNALLASRKMFLQRIAYLNVGIYPFTSIFLIVYCFLPALSFLSGQFIVRTL  
NVFTLYLLVITLTMCLAVLEIKSGISLEERNEQFLIGGTSAHLA AVLQGLLKVIAGIE  
ISFTLTSKSGGDEADDEFADLYIVKTSLMIPIVIMMVNLIAIAVGFSTRIT YSEIPQSKL  
LGGVFFSFVLAHLYPFAKGLMGRRGRTPPTIVFVSGLLAITISLLVAINPPSQNSQIGGSF  
TFP

>A2ZAK8

MASKGILKNGGKPPPTAPSSAAPT VVFGRR TDSGRFISYSRDDLDSEISSVDFQDYHVHIP  
MTPDNQMPDPAAGDEQQYVSSSLFTGGFNSVTRAHVMEKQASSARATVSACMVQCGSKI  
MRNGRGADILPCECDFKICVDCFTDAVKGGGGVCPGCKEYPKHAEEEEVVSASNHDAINRA  
LSLPHGHGHGPKMERRLSLVKQNGGAPGEFDHNRLFETKGTGYGNAIPEDDGVAGHPKE  
LMSKPRPLTRKLRIQA AVISPYRLLVLIRLVALGLFLMRIKHQNE DAILGMSIVCEL FAL  
SVLDQLPKLCPINRATDLSVLKDKFETPTPSNPTGKSDLPGIDIFVSTADPEKEPVLVTA  
NTILSILAADYPVDKLACYVSDDGALLTFEAMAEASFANLVFPFCRKHEIEPRNPDSYF

NLKRDPFKNKVKGDFVKDRRRVKREYDEFKVRVNGLPDAIRRRSDAYHAREEIQAMNLQR  
EKMKAGGDEQQLEPIKIPKATMADGTHPGTLQASPEHARGDHAGIIQVMLKPPSPSPSSS  
GGDMEKRVDLSGVDTRLPLMLVYVSREKRPGYDHNKKAGAMNALVRASAIMSNGPFILNLD  
CDHYVYNSKAFREGMCFMMDRGGDRLCYVQFPQRFEGIDPSDRYANHNTVFFDVNMRALD  
GLQGPVYVGTGCLFRRIALYGFDPFRSKDHTTPSCCLPRRRRTRSQPQPQEEEEETMALR  
MDMDGAMNMASFPPKFGNSSFLIDSI PVAEFQGRPLADHPSVKNRPPGALTI PRETLDA  
SIVAEAISVVSCYEEKTEGTRVGIYGSVTEDEVVTGYRMHNRGKSVYCVTHRDAFRGTAPI  
NLTDRLHQVLRATGSVEIFFSRNNALFASSKMKVLQRIAYLNVGIYPFTSVFLIVYCFLP  
ALSLSFGQFIVQTLNVTFLTYLLIITITLCLLAMLEIKSGIALEERNEQFLIGGTSAPHLA  
AVLQGLLKVIAGIEISFTLTSKQLGDDVDEFAELYAVKTSLMIPPLTIIMINLVIAIVG  
FSRTIYSTIPQSKLLGGVFFSFVLAHLYPFAKGLMGRRGRTPTIVYVSGLVAITISLLIA  
IKPPSAQANSQLGGSFSFP

>A4K2N5

MAGQFRSYVDPLLI LSQIVLMQTVYYGSLGLLALVDGLVLRSSPSLDQMFD AEILGFSTPP  
GRLSMMSFILNALTCALGLLYFIRRGKQCLDFTVTVHFFHLLGCFYSSRFPSALTLVQAV  
CIALMAVIGEYLCMRTELKEIPLNSAPKSNV

>A4K2W1

MAGQFRSYVDPLLI LSQIVLMQTVYYGSLGLLALVDGLVLRSSPSLDQMFD AEILGFSTPP  
GRLSMMSFILNALTCALGLLYFIRRGKQCLDFTVTVHFFHLLGCFYSSRFPSALTLVQAV  
CIALMAVIGEYLCMRTELKEIPLNSAPKSNV

>A5PJ65

MSEGDSVGD SVHGKPSVVYRFFTRLGQIYQSLDKSTPHTAVRVVTLGLSFIYMIRVYLLQ  
GYIVTYALGIYHLNLFIAFLSPKVDPSLMEDSDDGPSLPTKQNEEFRPFIRRLPEFKFHA  
ATKGILVAMVCTFFFAFNVPVFPILVMYFIMLFCITMKRQIKHMIKYRYIPFTHGKRTYK  
GKEDAGKAFAS

>A6ZS37

MDFVVDYQTYAMADTAPELPEPEPRLNLTSDAQSQPTGILDLQFKLPDLQRYSNNNATL  
PVDNDGAGSKDLHKMTHYAMSSIDKIQLSNPSKQLGQNSQDEKLSQQESQNFTNYEPKN  
LDLSKLVSPSSGSNKNTTNLVLSNKLSKILNNYTLINYQATVQLRKS LKVLEENKERLSL  
DEQKLMNPEYVGT LARRALRTDLESQLLKEHITVLEEFKPIIRRIKRLSSSVEKIQR TSE  
KLLSNETNEVPTNNVVLQEIDQYRLKAEQLK LKKKILLSIRDRFTLNQVEDDVITNGTID  
NIFFEVVKVINIKDESSFLTLPLNAGNALIMGVNEILEKTNKKIFNYLIDFLYSFES  
SSNLLNDHGTTEQESLNIFRKS LVLSSDLELFNELLKRVTTLSKSI LDEFLSQFDMNS  
TTSKPIILSAHDPIRYIGDVLASVHSIIANEAD FVKS LFDQDEDLKDTPI S ILOQNKT F  
LKGIDNKLLNDI IQSLSNSCRIRIEQIVRFEENPIINFEIVRLLKLYRVMFERKGIQDDS  
SIINNLKSLEDISK NRIIGYYEDYMKQTVMAETKNSSD DLLPELSEYMNKLVELFEIYE  
KTHAAEDEESEDNKLLSSKNLQ TIVEQPIKDVLLKQLQTSFPLAKKNEKEKASLLTIEIN  
CFDLIKSRLQPFEG LFAQDDDSRKITIVCDKLKEYTKQMLTLQIKFLFENTGLDLYSNLV  
NMI F PVDSVKDEL DYMYLALRDNLSMELDMVRKNVHDKLNYYLPQALTDVQGNLLFKLT  
SPMI ADEICDECFK KLSLFYNI FRKLLIHLYPNKKDQVFEILNFSTDEFDMLIGIDH

>A6ZS6

MRVYQFCRPFQLFTYFLCYLLV FVKANKEKISQKNYQVCAGMYSKEDKGKIDPFISFNLK  
KISGLSDESDPGLVVAIYDFQDFEHLGVQLPDEMYIICDDY AIDIGICEENRDEFIVQ  
DVVYDPYTSTNRS LANPIMTFSQNEVGLHDTRYPIKETGFYCVTAFRSSTSTKFN AVVNF

RNAYGQLAGTEINKLPLYGLLAVAYVAMALYSFAFKHKHELLPLQKYLLAFFVFLTAET  
IFVAYYDLKNEKGDTAGIKVYMVFLSILTAGKVTFSSFFLLLI IALGYGIVYPKLNKTLMR  
RCQMYGALTYAICIGFLIQSYLTDMEAPSPILITLIPMALALIIFFYYMI IRSMTKTVIY  
LKEQRQIVKLNMYKLLLYIIYASFLSVLAGSIVSSFIYVGMNTIDMIEKNRSRFFVTDFF  
TLVYFIVFVTIAFLRPTDTSYMLAASQQLPTDPENVADFDLGDLSFDDQDDASIIITGER  
GIDEDDLNLFNTDDEEGHDNVNHSQGHGVPSPSPK

>A8XP14

MEAQYQSTNFFLLQKVQHDLGRLEGQTQNEQDAQVVVQSIYGDISTLKDNLQALDNYVSREQ  
PARRQAARMRVDQLRMDVQRVDMASAVHTRMTQRRSASEREELLSARYRPNDTALSIGD  
HELQLNDRHLSSHNRLELISQGSVLDNLKSQHFSLRGVS RKMHDIGQALGLSNSTLQV  
IDRRVREDIFVIGCIVCCIFMYAFYRFRG

>A8Y236

MGLSRYLSRRHHVIQYCALLLFLYFIYSYVAVSNDAPRLNEEI PVFREFSEDLPQGSRKF  
PEQKPAALGDEALDPFEKYRGHEKIKEDEVAYEKDKAREGPGEGKPVKLPDDKETEKEA  
LSLYKANGYNAYISDMI SLNRSIKDIRHKECKMTYSAKLPTVSVI FPFHEHNSTLLRS  
VYSVINRSPPELLKEIILVDDFSEKPALRQPLEDFLKKNKIDHIVKILRTRKKREGLIRGR  
QLGAQEATGEILIFLDAHSECNYNLPPLLDPIADYRTVVC PFVDVIDCETYEIRPQDEG  
ARGSFDAFNKRLPLTKKDRENPTKPFDSPVMAGGYFAISAKFELGGYDEGLDIGGEQYE  
LSFKVQCHGKMVDAPCSRVAHIYRCKYAPFKNAGMGDFVSRNYKRVAEVMDEYKETLYKH  
RPGIGNADAGDLKLMKGIREKLQCKSFDFMKEIAFDQDKYPAIEPKASAEGEIRHVASN  
LCIDTQFKEQNQRFLRKCASEDKDGGGEQDLRLTRHDIRPKGRKICFDVSTSVDKAPII  
LFDCHSMKGNQLFKYRMPQKQIYHPVSGQCLTADENGKGF LHMKKCDSSSKLQQAQTIDQ  
ELLDQRQANEHKELE

>B0F9L4

MDLASRYKGVVGMVFGDNQSSNEDSYIQRLLDRI SNGTLPDDRRTAIVELQSVVAESNA  
QLAFGAAGFPVIVGILKDQRDDLEMVRGALETLLGALTPIDHARAQKTEVQAALMNSDLL  
SREAENITLLLSLLEEDFYVRYTLOILTALMNSQNRLQEAILTTPRGITRLMDMLMD  
REVIRNEALLLTLHTREAEI IQKIVVFEGAFEKIFSI IKEEGGSDGDVVVQDCELELNN  
LLRSSSSNQILLRETMGFEP IISILKLRGITYKFTQOKTVNLLSALETINMLIMGRADTE  
PGKDSNKLANRTVLVQKLLDYLLMLGVESQAPVAVRCMTFKCIGDLIDGHPKNRDILAS  
KVLGEDRQVEPALNSILRIILQTSSIQEFVAADYVFKTFCEKNTGQTMLASTLIPQPHP  
TSRDHLEDDVHMSFGSMLLRGLCSGEADGDLETCCRAASILSHVVKDNLRCKEKALKIVL  
ESPMPMGTPPEPLFQRIVRYLAVASSMKSKEKSSTLGKSYIQQIILKLLVTTVDCPTAVQ  
CFLDSRHHLTFLLELVTDPAATVCIRGLASILLGECVIYNKSIENGKDAFSVDDAVGQKM  
GLTSYFSKFEEMQNSFIFSPSKPPQGYKPLTRTPTPSEAEINEVDEVDEMVKGNEDHPM  
LLSLFDASFIGLVKSLEGNIRERIVDVYSRPKSEVAVVPADLEQKSGENEKDYINRLKAF  
IEKQCSEIQNLLARNAALAEVASSGRNEQSQGSEQRAS TVMDKVQMESIRRELQETSQR  
LETVKAEKAKIESEASSNKNMAAKLEFDLKSLSDAYNSLEQANYHLEQEVKSLKGGESPM  
QFPDIEAIKEEVRKEAQKESSEDELNDLLVCLGQEE SKVEKLSAKLIELGVDVDKLLLEDIG  
DESEAQAEESEED

>P35670

MPEQERQITAREGASRKILSKLSLPTRAEPAMKKSFAFDNVGYEGGLDGLGPSSQVATST  
VRILGMTQCSCVKSIEDRISNLKGIISMKVSLEQGSATVKYVPSVVCLQQVCHQIGDMGF  
EASIAEGKAASPSRSLPAQEAVVKLRVEGMTCQSCVSSIEGKVRKLGQVVRVKVSLSNQE

AVITYQPPLYIQPEDLRDHVNDMGFEAAIKSKVAPLSLGPIDIERLQSTNPKRPLSSANQN  
FNNSETLGHQGS HVVTLQLRIDGMHCKSCVLNIEENIGQLLGVQSIQVSLNKTAQVKYD  
PSC TSPVALQRAIEALPPGNFKVSLPDGAEGSGTDHRSSSSHSPGSPPRNQVQGTCTTL  
IAIAGMTCASCVHSIEGMISQLEGVQQISVSLAEGTATVLYNPSVISPEELRAAIEDMGF  
EASVSESCSTNPLGNHSAGNSMVQTTDGTPTSVQEVAPHTGRLPANHAPDILAKSPQST  
RAVAPQKCFLOIKGMTASCVSNIERNLQKEAGVLSVLVALMAGKAEIKYDPEVIQPLEI  
AQFIQDLGFEEAVMEDYAGSDGNIELTITGMTASCVHNIESKLTRTNGITYASVALATS  
KALVKFDPEIIGPRDI IKIIEEIGFHASLAQRNPNAHHLDHKMEIKQKKSFLCSLVFGIP  
VMALMIYMLIPSNPHQSMVLDHNIIPGLSILNLIFFILCTFVQLLGGYFYVQAYKSLRH  
RSANMDVLI VLATS IAYVYSLVILVVAEKAERSPVTFFDTPPMLFVFIALGRLEHLAK  
SKTSEALAKLMSLQATEATVVTLGEDNLI IREEQVPMELVQRGDIVKVVPGGKFPVDGKV  
LEGNTMADESLITGEAMPVTKKPGSTVIAGSINAHGSVLIKATHVGNDDTTLAQIVKLVEE  
AQMSKAPIQQLADRFSGYFVPIIIMSTLTLVVIVIGFIDFGVVQRYFPNPNKHISQTEV  
IIRFAFQTSITVLCIACPCSLGLATPTAVMVGTVAAQNGILIKGGKPLEMAHKIKTVMF  
DKTGTITHGVPRVMRVL LLDVATLPLRKVLAVVGTAEASSEHPLGVAVTKYCKEELGTE  
TLGYCTDFQAVPGCGIGCKVSNVEGILAHSERPLSAPASHLNEAGSLPAEKDAVPQTFVS  
LIGNRELRRNGLTISSDVS DAMTDHEMKGQTAILVAIDGVLGMIADAVKQEAALAVH  
TLQSMGV DVVLI TGDNRKTARAIATQVGINKVFAEVLPSHKVAKVQELQNKGKVMVGD  
GVNDSPALAQADMGVAIGTGTDAIEAADVVLIRNDLLDVVASIHL SKRTVRRIRINLVL  
ALIYNLVGIP IAAGVFMPIGIVLQPMGSAAMAASSVSVVLSLQLKCYKPKDLERYEAQA  
HGHMKPLTASQVSVHIGMDDRRDSPRATPDQVSYSQVSLSSLTSDKPSRHSAAADDDGD  
KSLLLNGRDEEQYI

>P61106

MATAPYNYSYIFKYIIIGDMGVGKSCLLHQFTEKKFMADCPHTIGVEFGTRIIIEVSGQKI  
KLQIDTAGQERFRAVTRSYYRGAAGALMVYDITRRSTYNHLSLTDARNLTNPNTVILI  
GNKADLEAQRDVTYEEAKQFAEENGLLFLEASAKTGENVEDAFLEAAKKIYQNIQDGS LD  
LNAAESGVQHKPSAPQGGRLTSEPQPQREGCGC

>P61204

MGNIFGNLLKSLIGKKEMRILMVGLDAAGKTTILYKLLKLG EIVTTIPTIGFNVETVEYKN  
ISFTVDVGGQDKIRPLRHYFQNTQGLIFVVDSDNDRERVNEAREELMRMLAEDEL RDAVLL  
VFANKQDLPNAMNAAEITDKLGLHSLRHRNYIQATCATSGDGLYEGLDLANQLKNKK

>P62330

MGKVLSKIFGNKEMRILMLGLDAAGKTTILYKLLKLGQSVTTIPTVGFNVETV TYKNVKFN  
VDVGGQDKIRPLRHYTGTQGLIFVVD CADRDRIDEARQELHRIINDREMRDAIILIFAN  
KQDLPDAMPHEIQEKLGLTRIRDRNYVQPSCATSGDGLYEGLTLTSNYKS

>P84077

MGNIFANLFKGLFGKKEMRILMVGLDAAGKTTILYKLLKLG EIVTTIPTIGFNVETVEYKN  
ISFTVDVGGQDKIRPLRHYFQNTQGLIFVVDSDNDRERVNEAREELMRMLAEDEL RDAVLL  
VFANKQDLPNAMNAAEITDKLGLHSLRHRNYIQATCATSGDGLYEGLDLSNQLRNQK

>P84085

MGLTVSALFSRIFGKKQMRILMVGLDAAGKTTILYKLLKLG EIVTTIPTIGFNVETVEYKN  
ICFTVDVGGQDKIRPLRHYFQNTQGLIFVVDSDNDRERVQESADELQKMLQEDEL RDAVLL  
VFANKQDMPNAMPVSELTDKLGLQHLSRRTYVQATCATQGTGLYDGLDLSHEL SKR

(6) 30 lysosomal proteins

>A5PF10

MTAERPGAVPLGRPGRPPMLGLGEAYRAQVFASIFLLLLSPAGVGARAKNDFNLVHPLVT  
MEQLLVSGKQIGSVDTFRIPLITTTTTPRGTLAFAEARKMSASDKGAKFIALRRSMDQGST  
SPTAFIVDDGETPDGLNLGAVVSDTTTGVVFLFYSLCAHKAGCRVASTMLVSKDDGISS  
PRNLSLDIGTEMFAPGPGSGIQKQAPQKGR LIVCGHGTLE RDGVFCLLSDDHGASRYGSG  
ISGIPYGQPKRENDFNPDECQPYELPDG SVVINARNQNNYHCR CRIVLRSYDACD TLRPR  
DVTFDPELVDPVVAAGAVATSSGIIFFSNPAHPEFRVNLTLRSFSNGTSRKETVQIPGPS  
GYSSLATLEGSVGGEDQAPQLYVLYEKGRNRYTESISLAKVSVYGT L

>A6BMK7

MTEEGPGIVSLGKLRPRMLRLGICRVQIFSAIFMLMSPAGVGAGAKDDFSLVHPLVTME  
QLLVSGKQIGSVDTFRIPLITTTTTPRGTLAFAEARKMSTSDKGAKFIALRRSMDQGSTSP  
TAFIVDDGETPDGLNLGAVVSDTTTGVVFLFYSLCAHKAGCQVASTMLVSKDDGVSSSPR  
NLSLDIGTEMFAPGPGSGIQKQREPRKGR LIVCGHGTLE RDGVFCLLSDDHGVSRYGGGV  
SGIPYGQPKRENDFNPDECQPYELPDG SVVINARNQNNYHCHCRIILRSYDACD TLRPRD  
VTFDTELVDPVVAAGAVATSSGIVFFSNPAHPEFRVNLTLRSFSNGTSRKETVQLPGPSG  
YSSLTTLEGNVDGKDEAPQLYVLYEKGRNQYMESISLVKVS VYGT L

>A7MB63

MIRRLVIFILFPLQLIEKCESTVDFSVPPIVKLEKGSSTSVSISLPRPLNATLVITFEIT  
FRSKNVTILQLPDEVVPPGTTNSSFRVTSQSVGQVTTYLHGNHSNQTSPRIRFLVIHSN  
IVSIIINQVIGIYFVASVSFYFPQVITNRRKSVVGLSFDVFLNLMGFVAYSVFNIGLFPVS  
IKEQFLLKYPNGVNPVDSNDVFFSLHAVALTLVVIVQCLLYERGSQRVSLAISFLVLSLF  
TLIALIMAAVGATTLQFLFCFSYIKLAVTLVKYFPQAYMNFHYKSTEGSIGNVLLDFTGG  
SFSLLQMFLQSYNNDQTLIFGDPTKFGGLGIFSIIFDVVFFIQHFCLYRKKPGYDQLN

>B1H1P9

MADGSCLGSGPQLGLIALLVLLFSAVPLAQSRELRFVTLVYRHGDRSPVHGYP TDVHKE  
SVPQGYGQLTQVGMKQHDLGQELRARYKGF LNESYNRHEIYVRSTDVDRTLMSAEANLAG  
LYPPEGPQIFNPNITQPIPIHTIPESEDQLLKFPISPCPAYVKLQEETRQSAEYINMTT  
YKAFLQMVANKTGLSDCTLESVSVYDTLFCCKTHNFSLPTATADVLSKLNKLDKDFSVFL  
FGVHERVKKARLQGGVLDQILKNMTAAANNASNGLKLLAYS AHDSTL GALQLALDVYNG  
KQAPYASCHIFELYKEDSGNFTVQMYFRNESGKTPYPVSLPGCAHACPLQDFQSLLPIL  
AQDEEECQTTSFIMTEETIIGLTIGAIALFIIIVLMLLSCNEPKDDGYQHVSDGDDHE  
TKGLAM

>B5FYY5

MLRPKALTQVLSQANTGGVQSTLLL NNEGSL LAYSGYGDTDARVTAAIASNIVAYDKNGH  
QAFNEDNLKFI LMDCM EGRVAITRVANLLLCMYAKETVGF GMLKAKAQALVQYLEEPLTQ  
VAAS

>B5X7X4

MLRPKALTQVLSQANTSGVQSTLLL NNEGSL LAYSGYGDTDARVTAAIASNISAYDKNGH  
QAFNEDK LKFI LMDCM EGRVAITRVANLLLCMYAKETVGF GMLKAKAEALVLYLEEPLTQ  
VAAS

>O00906

MKHQVLLP LLVTTAI IAGSVGVYTHSKPLL GQSQDQVLP PFT PPLQNGHIDLQ GKYIVST  
LDQVNATHINIYANYNGPEASYAMPKNKLITHILVSI VINDVNQLGIKITDRTYRHFVEP  
YSNLFPHDKVFNFPANNQFDITLPKRGEAFYLTIKRKDTGEVVFDTNNQFFVYSDLYHEF

TVAMQNEFIYGLGERRNKQFLYDSGEYTFLNKDQYESVADGHPDQQTGTHPMYLRRENS  
GNFHVVFLRNYNSIQAVYSKSKSLTYKVVGGLEFKIFLGDKSPETSLKLYHSYVNGFNL  
HPFAHGFBHQRGYKTSEMMTTVDTFNTNGLPFDTISDIDYMKDLTDFTIDTSRYDKAQMN  
TMLDRSVAAGVHVPIIDAGIALGDVSNERGKELGVYQKSNKTGEDLIGCVPGKVNYPDFN  
HPLSQEFAEGLMNLTKNYGITPSGFIDMNEFSNFINGEISEDQNCIMPGDTTTTNPNYLGN  
SVEDFYTRIPFEVGGADHPQQEKTMSYDAPKYNADAKTVYIPNYELREFDFHNLNGFSE  
GIATNYALKKMGNKLPFIIISRSQIAGSGQFVQHTGDNGSQDFLQYSLGEIFNFMNYGIPM  
TGADICGFAQNTTAE LCARMQVGFYFYSRNHNSNDTIPQEPYAFDPDSTYVLDSSKSKSLR  
LRYALLKQYYSHFVSSNGVGTVFRPTFFNFPPDASLLTNDQQFMIGDSSLGQPVLVQSAT  
PARFSHSSYLTFPSSGAFYDFVTDVATLNAQRYTNANNGQIKNVKFDDIMPLYIREGYTV  
FTQLASTALRSRLDLSNFELHVALAKSGTSYTAKGKFITIQDYSDDNLIQKICIGANNCSF  
DIQVTGVVNGANLDLTIQIAGESAQTNFETINVNKIIPYAADLKFAASTATFTISKNGTI  
NASIPLQAAQQE

>O02467

EKNMPIVITTSFTNASQKAEVLKDEGKALDAVEQGGIVCENEQCDRTVGYGGSPDEDEGET  
TLDAFIMDGSTMNVGAVAALRRIKSAISVARHVMYETTHSFLAGELATKFAVEMGFKEES  
LSTDESRELSKRFEKQCQPNFRKNVCPDRKHCGPYHKKRNFVDYIHPEVFFVDQYNHDT  
IGMVAVDSKGDVAAGTSTNGAKFKIPGRVGDSPIPGAGAYADNTVGGAAATGNNDTMMRF  
LPSFLAVEEMRRGAS PANAAKTAIKRISAHHPDFMGAVIALSKNGQYGAACNGIETFFPV  
VQDKTRKTFEVVTIKC

>O18835

MSRGPAGAVALGPLLTCGLALEGMLYPRESRERKDL DGLSFRADFS DGRRQGFEEQQY  
RAPLRESGPTLDMPVPSSFNVDVGQDRQLRSFVGVYEREATLPRRSQDPGTRVVLRIKSAH  
YYAIVVNGVHVAEHEGGHLPFEADISKLVQSGPLSSCRITLAINNTLTPHTLPPGTIVYK  
TDASKYPKGYFVQNTYFDFFNAGLHRPVLTYTPTTYIDDIIVTTGVDQDTGLVDYQIF  
VQGSEHFQLEVYLLDEEGKVVAQGTGSQGR LQVPNVHLPYLMHEHPAYLYSLEVRLTAQM  
AAGPVSDFYTLVPVGI RTVAVTERQFLINGKPFYFHGVNKHEDADIRGKGFDP LLVKDFNL  
LRLGANAFRTSHYPYAEVVMQLCDRYGIVVIDESPGVGIMLVQSYSNVSLQHHLEVMGEL  
VRRDKNHPSVVM SVANEPTSFLKPAAYYFKTLIAHTKALDPSRPVTFVTNSNYEADLGAP  
YVDVICVNSYYSYHDYGHMEVIQLQLATEFENYRTYQKPIIQSEYGAETIAGFHQDPPLM  
FSEYQKGLLEQYHLVLDQKRKEYVVGELINFADFM TDQSPQRAVGNRKGIFTRQRQPKA  
AAFLLRERYKLANETGHRSAAKSQCLENSPFAL

>O19015

MDFPGAARLLSLLLVP LLLGPARGLRNASQRTFKIDYGHNRFLKDGQPFYRISGSIHYFR  
VPRFYKDRLLKMKMAGLNAIQTYVPNFHEPQPGQYQFSGEHDVEYFLKLAHELGLLVILR  
PGPYICAEDMGGLPALLLKE SII LRSSDPDYLA AVDKLGVLLPKMKPLLYQNGGPIITVQ  
VENEYGSYFTCDYDYL RFLQRRFRDHLGGDVLLFTTDGAHEKFLQCGALQGIYATVDFGP  
DANITAAFQIQRKSEPRGPLVNSEFYTG LDHGQPHSRVRTEVVASSLHDVLAHGANVNLY  
MFIGGTNFAYNGANIPYQPQPTS YDYDAPLSEAGDLTDKYFALRDVIRKFEKVPEGFIPP  
STPKFAYGKVALQKKTVEDALNVLC P AGPIKSLYPLTFIQVKQYFGFVLYRRTLPQDCS  
NPTPLSSPLNGVRDRAYVAVDGVPQGV LERSYVITL NITGQAGATLDLLVENMGRVNYGR  
YINDFKGLISNLT LGSSVLTDMI FPLDTEDAVRSHLGGHGRNHGRQDNKAF AHSSNYTL  
PAFYAGNFSIPSGIPDL PQDTFIQFSGTKGQVINGFNLGRYPGRGPQVTLFVPRHILVTS  
APNTIMVLELERAPCDDNGPELCTVEFVDRPLISATPTSSHPLPDLSDRDSGDRV

>O35604

MGAHHPALGLLLLLLLLLCPAQVFSQSCVYGECEGIATGDKRYNCKYSGPPKPLPKDGYDLVQ  
ELCPGLFFDNVSLCCDIQQQLQTLKSNLQLPLQFLSRCPSCFYNLMTLFCELTCSPHQSQF  
LNV TATEDYDFDPKTPENKTNVKELEYVVGQSFANAMY NACRDVEAPSSNEKALGLL CGRD  
ARACNATNIEYMFNKDNGQAPFTIIPVFS DLSILGMEPMRNATKGCNESVDEVTGPCSCQ  
DCSIVCGPKPQPPPPMPRI GLDAMYVIMV TYVAF LFVFFGALLAVCHRRRYFVSEYTP I  
DSNIAFSVNSSDKGEASCCDPLGAAFD DCLRRMFTKGAF CVRNPTCIIFFSLAFITVCSS  
GLVFVQVTTNPVELSAPHSQARLEKEYFDKHF GPFPRTEQLIIQAPNTSVHIYEPYPAGA  
DVFPFGPPLNKEILHQVLNLQIAIESITASYN NETVTLQD ICVAPLSPYNKNCTIMSVLNY  
FQNSHAVLDSQVGDFFYIYADYH THFLYCVRAPASLNDTSL LHGPCLGTFGGPVFPVLV LG  
GYDDQNYNNATALVITFPVNNYNDTERLQRAAEKEFISFVKNYKNPNLTISFTAERSIE  
DELNRESNSDVFTV IISYVVMFLYISLALGHIQSCSRLLVDSKISLGIAGILIVLSSVAC  
SLGIFSYMGMPLTLIVIEVIPFLVLAVGVDNIFILVQTYQORDERLQEE TLDQQLGRILGE  
VAPTMFLSSSFSETSAFFFGALSSMPAVHTFSLFAGMAVLIDFLLQITCFV SLLGLDIKRQ  
EKNHLDILCCVRGADDGQGS HASESYLFRFFKNYFAPLLKDLRPIVVAVFVGVLSFSVA  
VVNKVDIGLDQSL SMPNDSYVIANFKSLAQYLHSGPPVYFVLEEGYNYSSRKGQNMVCGG  
MGCNDNSLVQQIFNAEELDTYTRVGFAPSSIDDYFDVSPQSSCCRLYNVTHQFCNASVMD  
PTCVRCRPLTPEGKQRPQGKEFMKFLPMFLSDNPNPKCGKGGHAA YGS AVNIVGDDTYIG  
ATYFMTYHTILKTSADYTDAMKKARLIASNITETMR SKGSDYRVFPYSVFYVFYEQYLT I  
IDDTIFNLSVSLGSI FLVTLVVLGCELSAVIMCITIAM IILVNMFGVMLGISLNAVSLVNL  
VMSCGISVEFCSHITRAFTMSTKGS RVSRAEEALAHMGSSV FSGITLTKFGGIVVLAFAK  
SQIFEIFYFRMYLAMVLLGATHGLIFLPVLLSYIGPSV NKAKRHTTYERYRGT ERERLLN  
F

>O35657

MVGADPTRPRGPLSYAGRRGQGLAAIFLLLVSA AESEARAEDDFSLVQPLVTMEQLLVSG  
KQIGSVDTFRIP LITATPRG TLLAF AEARKKSASDEGAKFIAMRRSTDQGSTSSTAFIVD  
DGEASDGLNLGAVVNDVDTGIVFLIYTLCAHKVNCQVASTMLVSKDDG ISSPPRNLSVDI  
GTEMFAPGPGSGIQKQREPGKGR LIVCGHGT LERDGVFCLLSDDHGASHYGTGVSGIPFG  
QPKHDHDFNPDECQPYELPDGSVI INARNQNNYHCR CRIVLRSYDACD TLRPRDVTFDPE  
LVDPVVAAGALATSSGIVFFSNPAHPEFRVNLTLRSFSNGTSQKERVQVPGPSGYSSLTA  
LENSTDGKKQPPQLFVLYEKGLNRYTESISMVKISVYGT L

>O46427

MAVLSLLCAGALLGPPACGASNLA VSSFEKLFHFKSMVQH QKKYSLEEYHHRLQV FVSNRK  
INAHNAGNHTFKLGLNQFSDMSFDEIRHKYLSE PQNCSATKGN YLRGTGPYPPSM DRKKG  
NFVSPVKNQGSCG SCTFSTTGALES AVAIA TGKMLSLAEQQLV DCAQNFNHGCQGG LPS  
QAFEYIRYNGKIMGEDTYPYKGQDDHCKFQPDKAI AFVKDVANITMNDEEAMVEAVALYN  
PVSF AFEVTNDFLMYRKGIYSSTSCHKTPDKVN HAVLAVGYGEENGIPIYIVKNSGPQGMN  
GYFLIERGKNMCGLAACASYPIPLV

>O60931

MIRNLTIFILFPLKLV EKCESSVSLTVPPVVKLENGSSTNVSLTLRPPLNATLVITFEIT  
FRSKNITILELPDEVVPPGV TNSSFQVTSQNVGQLTVYLHG NHSNQTGPRI RFLVIRSS  
AISIINQVIGIYFVASISFY PQVIMNRRKSVIGLSFDFVALNLTGFVAYSVFNIGLLVPY  
IKEQFLLKYPNGVNPVNSNDVFFSLHAVVLT LIIIVQCCLYERGGQ RVSPAIGFLVLALF  
AFVTMIVA AVGVTTLQFLFCFSYIKLAVTLVKYFPQAYMNFYKSTEGSIGNVLLDFTGG



SFSLQMFLLQSYNNDQTLIFGDPTKFGGLGVFSIVFDVVFVFIQHFCLYRKRPGYDQLN  
>O75503

MAQEVDTAQGAEMRRGAGAARGRASCALALLLAVVPGSRVSGIPSRRHVPYKRFDFRPK  
PDPYCQAKYTFCTGSPIPVMEGDDDIIEVFRQLQAPVEFKYGDLLGHLKIMHDAIGFRSTL  
TGKNYTMEEYELFQLGNCTFPHLRPEMDAPFCNQGAACFFEGIDDVHKENGTLVQVATISG  
NMFNQMAKVKQDNETGIYYETNVKASPEKGAETFDSYDCSKFVLRFTFNKLAIEFGAEFKNI  
ETNYTRIFLYSGEPTYLGNETSIVFGPTGNKTLGLAIKRFYYPFKPHLPTKEFLLSLLQIF  
DAVIVHKQFYLFYFNFYFLPMKFPFIKITYEEIPLPIRNKTLTSLG  
>O76856

MKLLIITLFLATIVLAQALTVPLNFHQASRESRRRVPQKSNRLSALNAGTTIPISDFEDA  
QYYGAIITIGTPGQAFKVVFDTGSSNLIIPSKKCPITVVACDLHNKYNSGASSTYVANGTDF  
TIQYSGGAMSGFVSQDSVTVGSLTVKDQLFAEATAEPIAFDFAKFDGILGLAFQSI SVN  
SIPPVFYNMLSQGLVSSTLFSFLSRTPGANGGELSFGSIDNTKYTGDI TYVPLTNETYEF  
VMDDFAIDGQSAGFCGTTCHAICDSGTSIAGPMADITALNEKLGAVILNGEGVFSDCSV  
INTLPNVTITVAGREFVLTTPKEYVLEVTEFGKTECLSGFMGIELNMGNFILGDVFI SAYY  
TVFDFGNKQVGFATAIQG  
>O77695

GLAMAAVLGPLLGCALALQGGMLYPRESQSRERKELDGLSFRADFSNRRRGFEQYRRP  
LRESGPTLDMPVPSSFNDISQDRLRHFVGVYEREVILPERTQDLSTRVVLRIGSAHAYAI  
VVNGVHTLEHEGGYLPFEADISNLVQVGPLSSHVRITIAINNTLTSTTLPPGTIQYLTDI  
SKYPKGYFIQNTYFDFFNAGLQRSVLLYTTPTAYIDDI TVTTGVEHDTGLVNYQISVKG  
SNLFELEVRLDAENKLVANGTGIQGQLKVPGARLPYLMHERPAYLYSLEVRLTAQTSLG  
PVSDFYTLVPGIRTVAVTESQFLINGKPFYFHGVNKHEDADIRGKGFDP LLVKDFNLLRL  
GANAFRTSHYPYAEVQLQCDRYGIVVIDECPGVGLALPQFFNNVSLQNHMRVMEEVVRR  
DKNHPAVVMSVANEPASHLESAGYYLKMVITHTKALDPSRPVTFVTNSNYAADKGA PYVD  
VICLNSYYSYHDYGHLELIQRQLTTQFENYKTYQKPIIQSEYGAETIVGFHQDPPLMFTE  
EYQKSLLEQYHVVDLQKRRKYVVGELINFADFMTEQSPTRVLGNKKGVFTRQRQPKSAAF  
LLRERYKIANETRYPHSIAKSQCLENSPFT  
>O89023

MGLQARLLGLLALVIAGKCTYNPEPDQRMLPPGVSLGRVDPEEELSLTFALKQRNLERLS  
ELVQAVSDPSSPQYGYKYLTLLEDVAELVQPSPLTLLTVQKLSAAGARNCD SVTTQDFLTCL  
SVRQAELLLPGAEFHRYVGGPTKTHVIRSPHPYQLPQALAPHVDFVGG LHRFPSSPRQR  
PEPQQVGTVSLHLGVTPSVLRQRYNLTAKDVGSGTTNNSQACAQFLEQYFHNSDLTEFMR  
LFGGSFTHQASVAKVVGKQGRGRAGIEASLDVEYLSAGANISTVYSSPGRHEAQEPFLQ  
LLLLSNESSLPHVHTVSYGDEDESLSSIYIQRVNTEFMKAAARGLTLLFASGDTGAGCSV  
SGRHKFRPSFPASSPYVTTVGGTSFKNPFLITDEVVDYISGGGFSNVFPRPPYQEEAVAQ  
FLKSSSHLPPSSYFNASGRAYPDVAALSDGYVVSNMVPIPVSGTSASTPVFGGILSLINE  
HRI LN GRPPLGFLNPRLYQQHGTGLFDVTHGCHE SCLNEEVEGQGFCSGPGDPVTGGTPN  
FPALLKTLLNP  
>O97524

MLRGPAAVAALGPLLACGLALRGGMLYPRESQSRERKELNGLSFRADFS ENRRQGFEQQY  
RTPLRESGPTLDMPVPSSFNVDVQDRQLRSFVGVYEREATLPQRTQDLGTRVVLRIGSAH  
YYAIVVNGVHVAEHEGGHLPFEADISKLVSQGLASCRITIAINNTLTPHTLPPGTILYQ  
TDTSKYPKGYFVQNFDFFNAGLHRPVLLYTTPTTYIDDI TISTSVNQDTGLVDYQIF

VEGGEHFQLEVRLLDEEGKVVAQGTGGRGQLQVPNAHLPLYLMHEHPAYLYSLEVRLTAQT  
AAGSVSDFYTLFVGI RTVAVTEHQFLINGKPFYFHGVNKHEDADIRGKGFDP LLVKDFNL  
LRLGANAFRTSHYPYAEV MQLCDRYGIVVIDESPGVGIVLVESYSNVSLQHHLEVMEEL  
VRRDKNHPAVVMSVANEPASF LKPAGYYFKTLIAHTKALDPSRPVTFVTNSNYEADLGAP  
YVDVICVNSYYSYHDYGHMEVIQLQLATQFENYRTYQKPIIQSEYGADTIAGFHQDPPLM  
FSEYQKGLLEQYHLVLDQKRKEYVVGELINFADMTNQSPQRVMGNKKGIFTRQRQPKG  
AAFLLRERYKLANETRYPSAVKSQCLEN SPFTL

>P00786

MTALPLL CAGALLSAGATAELTVNAIEKFHFTSMKQHOKTYSSREYSHRLQVFANNR KIQ  
AHNQRNHTFKMGLNQFSDMSFAEIKHKYLSE PQNCSATKSNYLRGTGPYPSSMDRKKGNV  
VSPVKNQGACGCTFSTTGALES AVAIASGKMMTLAEQQLVDCAQNFNNHGCQGGLPSQA  
FEYILYNKGIMGEDSYPIYGKNGQCKFNPEKAVAFVKNV VNI TLNDEAAMVEAVALYNPV  
SFAFEVTEDFMMYKSGVYSSNSCHKTPDKVNHAVLAVGYGEQNGLLYIVKNSG SNGNNGY  
FLIERGKNMCGLAACASYPI PQV

>P00787

MSLIPLSCLLAL TSAHDKPSSHPLSDDMINYINKQNTTQAGRNFYNVDISYLK KLCGTVL  
GGPNLPERVGFSE DINLPESFDAREQSNCP TIAQIRDQGSCGSCAFGAVEAMSDRICIHT  
NGRVNVEVSAEDLLTCCGIQCGDGCNGGYP SGANFTRKGLVSGGVYN SHIGCLPYTIPPC  
EHHVNGSRPPCTGEGDTPKCNKMCEAGYSTSYKEDKHYGYTSYSVSDSEKEIMAEIYKNG  
PVEGAFTVFSDFLYKSGVYKHEAGDVMGGHAIRILGGIENGVPYLVANSNVDGDNGFFK  
ILRGENHCGIESEIVAGIPRTQQYGRF

>P00795

GPIPEVLKNYMDAQYYGEIGIGTPPQCFTVVFDTGSSNLVPSIHCKLLDIACIHHKYNSG  
KSSTYVKNGTTFAIHYGSGSLSGYLSSQD TVSVPCNSALS GVGGIKVERQTFGEATKQPG  
LTFIAAKFDGILGMAYPRISVNNVVPVFDNLMQQKLV DKDIFSYLNRDPGAQPGGELML  
GGIDSKYYKGLDYHNVTRKAYQIHMNQVAVGSSLT LCKGGCEAIVDTGTSLIVGQPEEV  
RELGAIGAVPLIQGEYMI PCEKVPSLPDVTVT LGGKKYKLSSENYTLKVSQAGQTICLS  
GFMGMDIPPPGGLILGDVFIGRYYTVFDRDLNRVGLAEAA

>P04988

MKVILLFVLAVFTV FVSSRGIPLEEQSQFLEFQDKFNKYSHEEYLERFEIFKSNLGKIE  
ELNLIAINHKADTKFGVNKFADLSSDEFKNY YLNNKEAIFTDDL PVADYLDDEFINSIPT  
AFDRTRGAVTPVKNQGQCGSCSFSTTGNVEGQH FISISQNKLVSLSEQNLVDCDHECMEYEG  
EQACDEGCNGLQPNAYNYIIKNGGIQTESSYPYTAETGTQC NFNSANIGAKISNFTMIP  
KNETVMAGYIVSTGPLAIAADAVEQFYIGGVFDI PCNPNSLDHGILIVGYSAKNTIFRKN  
MPYIVKNSGADGEQGYIYLRRGKNTCGVSNFVSTSI I

>P04989

MRLLVFLILLIFVNF SFANVRPNRGRFSESQYRTAFTETLKFNRQYSSSEFSNRYSIFKS  
NMDYVDNNSKGD SQTVLGLNNFADITNEEYRKYTLGTRVNAHSYNGYD GREVLNVEDLQT  
NPKSIDRTKNAVTP IKDQGQCGSCSFSTTGSTEGAHALKTKKLVSLSEQNLVDCSGPEEN  
FGCDGGLMNAFDYIIKNGKIDTESSYPYTAETGSTCLFNKSDIGATIKGYVNITAGSEI  
SLENGAQHGPPVSAIDASHNSFQLYTSGIYYEPKCSPT ELDHGVLVVG YGVQGDDEGPV  
LNRKQTIIVIHKNEDNKV ESSDSSDSVRPKANNYIVKNSG TSGIKGYILMSKDRKNNCGI  
ASVSSYPLA

>P06760

MSPRRSVCFVLGQLLCSCAVALQGGMLFPKETPSRELKVL DGLSFRADYSNNRLQGFEKQ  
YRQPLRESGPTLDMPVPSSFNDITQEAE LRNF IGVYEREAVLPQRTQDTRRVVLRINSA  
HYAVVVNGIHVVEHEGGHLPFEADITKLVQSGPLTTFRV TIAINNTLTPYTLPPGTIVY  
KTDP SMYPKGYFVQDISFDFFN YAGLHRSVVLYTTP TTYIDDI TVTTD VDRD VGLVNYIS  
VQGS DHFQLEVRLLDEDGKIVARGTGN EGQLKV PRAHLPYLMHEHPAYLYSLEVTMTTPE  
SVSDFYTL PVGIRTVAVTKSKFLINGKPFYFQGVNKHEDSDIRGRGFDP LLIKDFNLLRL  
GANSFRTSHYPYSEEVLQLCDRYGIVVIDECPGVGIVLPQSFGNVSLRHHLEVMDELVRR  
DKNHPAVVMSVANEPVSS LKPAGYYFKTLIAHTKALDPTRPVTFVSNTRYDADMGAPYVD  
VICVNSYLSYHDYGHLEVIQLQLTSQFENYKMYQKPIIQSEYGADAVSGLHEDPPRMFSE  
EYQTALLENYHLILDEKRKEYVIGELINFADFM TNQSPLRVTGNKKGIFTRQRNPKMAAF  
ILRERYRIANETR GYGSVPRTQCMGSRPFTF

>P07154

MTPLLLLAVLCLGTALATPKFDQTFNAQH QKSTHRRLYGTNEEERRAVEKNMRMIQLHNG  
EYSNGKHGFTMEMNAFGDMTNEEFRQIVNGYRHQKHKKGR LFQEPLMLQI PKTV DREKGC  
VTPVKNQGCQCGS CAFSASGCL EGQMFLKTGKLI SLSEQNLVDCSHDQGNQGCNGGLMDFA  
FQYIKENGLDSEESYPYEA KDGSCKYRAEYAVANDTGFVDI PQQEKALMKAVATVGPIS  
VAMDASHPSLQFYSSGIYYE PNCSSKDL DHGVLVVG YGYEGTDSNKDKYLVKNSGKEGMD  
GYIKIAKDRNNHCGLATAASYPIVN

>P07602

MYALFLLASLLGAALAGPVLGLKECTRGSAVCQNVKTASDCGAVKHCLQTVNKPTVKSLP  
CDICKDVVTAAGDMLKDNATEEEILVYLEKTCDL PKPNMSASCKEIVDSYLPVILDIK G  
EMSRPGEVCSALNLCESLQKHLAELNHQKQLESNKIPELDMTEVVAPFMANIPLLLYPQD  
GPRSKPQPKDNGDVCQDCIQMVTDIQTAVRTNSTFVQALVEHVKEECDRLGPGMADICKN  
YISQYSEIAIQMMMHMQPKEICALVGFCD EVKEMPMQTLVPAKVASKNVI PALELVEPIK  
KHEVPAKSDVYCEVCEFLVKEVTKLIDNNKTEKEILDAFDKMC SKLPKSLSEECQEVVDT  
YGSSILSILLEEVSP ELVCSMLHLCSGTRLPALTVHVTQPKDGGFCEVCKKLVGYLDRNL  
EKNSTKQEILAALEKGC SFLPDPYQKQCDQFVAEYEPV LIEILVEVMDPSFVCLKIGACP  
SAHKPLLGTEKCIGPSYCQNTETAQAQCNAVEHCKRHVN

>P07688

MRLLATLSCLLVLT SARSSLYFPPLSDELVNFVNKQNTTKAGHNFYNVDLSYVKKLCGAI  
LGGPKLPQRDAFAADVLPESFDAREQPNCPTIKEIRDQGSCGSCAFGAVEAISDRICIH  
SNGRVNVEVSAEDMLTCCGGEGDGCNNGGFPSGANFTKKGLVSGGLYN SHVGRPYSIPP  
CEHHVNGSRPPCTGEGDTPKCSKTCEPGYSPSYKEDKHFGCSSYSVANNEKEIMAEIYKN  
GPVEGAFSVYSDFLLYKSGVYQHVS GEIMGGHAIRILGGVENGT PYLVGNSNTDGDNGFF  
KILRGQDHCGIESEIVAGMPCTHQY

>P09648

APRSVDREKGYVTPVKDQGCQCGS CAFSTTGALEGQHFRTKGKLVSLSEQNLVDCSRPEGN  
QGCNGLMDQAFQYVQDNGGIDSEESYPY TAKDDEDCRYKAEYNAANDTGFVDI PQGHER  
ALMKAVASVGPVSV AIDAGHSSFQFYQSGIYYEPCSS EDLDHGVLVVG YGFEGGKKYIV  
KNSGEKDGKGYIYMAKDRKNHCGIATAASYPLV

>P11456

MMSPLHSSRTGLLLLLLFSVAVRESQTEEKTCDLVGEKKGKESKELALLKRLTPLFNKSF  
ESTVGGQSPDMYSYVFRVCREAGNHSSGAGLVQINKSNGKETVVGRFNETQIFNGSNIMLI  
YKGGDEYDNHCGREQRRAVVMIS CNRHTLADNFNPVSEERGVQDCFYLFEMDSSLACSP

EISHLVSGSILLVTLASLVAVYIIGGFLYQRLVVGAKGMEQFPHLAFQDLGNLVADGCDF  
VCRSKPRNVPAAYRGGVDDQLGEESEERDDHLLPM

**(7) 30 mitochondrion proteins**

>O15528

MTQTLKYASRVFHRVRAPELGLGASLGYREYHSARRSLADIPGPSTPSFLAELFCKGGLSRL  
HELQVQGAAHFGPVLASFGTVRTVYVAAPALVEELLRQEGPRPERCSFSPTHEHRCRQRA  
CGLLTAEGEEQRLRSLLAPLLLRPQAAARYAGTLNNAVCDLVRRLRRQRGRGTGPPALVR  
DVAGEFYKFGLEGIAAVLLGSRLGCLEAQVPPDTETFIRAVGSVVFVSTLLTMAMPHLRHL  
VPGPGRLCRDDQMFQFAAQRHVERREAEAAAMRNGGQPEKDLESGAHLTHFLFREELPAQSI  
LGNVTELLLAGVDTVSNLTSALYELSRHPEVQTALHSEITAALSPGSSAYPSATVLSQLP  
LLKAVVKEVLRLYPVVPGNSRVPDKDIHVGDYIIPKNTLVTLCHYATSRDPAQFPEPNSF  
RPARLGEGPTPHPFASLPFGFGKRSCMGRRLAELQLMALAQILTHFEVQPEPGAAPVRP  
KTRTVLVPERSINLQFLDR

>O43772

MADQPKPISPLKNLLAGGFGGVCLVFGVHPLDTPKVRQLQTQPPSLPGQPPMYSGTDFDCFR  
KTLFREGITGLYRGMAAPIIGVTPMFAVCFGGFGLGKKLQKHPEDVLSYPQLFAAGMLS  
GVFTTGIMTPGERIKCLLQIQASSGESKYTGTLDCAKKLYQEFGIRGIYKGTVLTLMRDV  
PASGMFYMTYELKNIFTPEGKRVSELSAPRILVAGGIAGIFNAVAIPPDVLKSRFQTAPP  
GKYPNGFRDVLRELIRDEGVTSLYKGFNAVMIRAFPANAACFLGFVAMKFLNATPNL

>O75027

MALLAMHSRAAAAAAFEKRRHSAILIRPLVSVSGSPQRPQHLGALGTARAYQIPESLKS  
ITQRLGKGNLQFLDAAKALQVPLIEKRTCHGHAGGLHTDPKEGLKDVDRKI IKAMLS  
YVPKDRPDLRARVAISLGFLLGAKAMNIVVPMFKYAVDSLQMSGNMLNLSAPNTVAT  
MATAVLIGYVSRAGAAFFNEVRNAVFGKVAQNSIRRIAKNVFLHLHNLDLGFHLRQGTG  
ALSKAIDRGRGISFVLSALVFNLLPIMFEVMLVSGVLYYKCGAQFALVTLGLTGTYTAF  
TVAVTRRTRFRIEMNKADNDAGNAIDSLLNYETVKYFNNEREYEAQRYDGFLKTYETASL  
KSTSTLAMLNFGQSAIFSVGLTAIMVLASQGI VAGTLTVGDLVMVNGLLFQLSLPLNFLG  
TVYRETRQALIDMNTLFTLLKVDQIKDKVMASPLQITPQTATVAFDNVHFEYIEGQKVL  
SGISFEVPAGKKVAIVGGSGSGKSTIVRLLFRFYEPQKGSYLAGQNIQDVSLESLLRAV  
GVVPQDAVLFHNTIYNNLLYGNISASPEEVYAVAKLAGLHDAILRMPHGYDTQVGERGLK  
LSGGEKQRVAIARAILKDPVILYDEATSSLD SITEETILGAMKDVVKHRTSIFIAHRLS  
TVVDADEIIVLDQGKVAERGTHHGLLANPHSIYSEMHTQSSRVQNHDPKEAKKENISKE  
EERKKLQEEIVNSVKGCNCSC

>O75324

MSIMDHSPTTGVTIVIVILIAIAALGALILGCCYLRLQRISQSEDEESIVGDGETKEPFL  
LVQYSAKGPCVERKAKLMTPNGPEVHG

>O75616

MAAPSRGARLVQSVLRVQVGPVHVARERVIPFSSLLGFQRRVCVSCVAGSAFSGPRLASASR  
SNGQGSALDHFLGFSQPDSSVTPCVPAVSMNRDEQDVLLVHHPDMPENSRVLRVLLGAP  
NAGKSTLSNQLLGRKVFVSRKVHTTRCQALGVITEKETQVILLDTPGIISPQKQKRHLL  
ELSLEDPKSMESADLVVVLVDVSDKTRNQLSPQLLRCLTKYSQIPSVLVMNKVDCLKQK  
SVLLELTAALTEGVVNGKLLKMRQAFHSHPGTHCPSPAVKDPNTQSVGNPQRIGPHFKEI  
FMLSALSQEDVKTLKQYLLTQAQPGPEYHSAVLTSQTPEEICANIIREKLEHLPEVQVY  
NVQOKTAVEEGPGGELVIQOKLLVPKESYVKLLIGPKGHVISQIAQEAGHDLMDIFLCDV

DIRLSVKLLK

>O94826

MAASKPVAAVVAAPVSSGSGVGGGGTAGPGTGGLPRQLALAVGAPLLLGAIAIYLSRQ  
QRRREARGRGDASGLKRNSERKTPEGRASPAPGSGHPEGPGAHLDMNSLDRAQAANKNGN  
KYFKAGKYEQAIIQCYTEAISLCPTEKNVDLSTFYQNRAAAFEQLQKKEVAQDCTKAVELN  
PKYVKALFRRAKAHEKLDNKKECLEDDVTAVCILEGFQNNQSMMLLADKVLKLLGKEKAKEK  
YKNREPLMPSPFIKSYFSSFTDDIISQPMLKGEKSDEDDKKEGEALEVKENSGYLKAKQ  
YMEENYDKIISECSKEIDAEGKYMAEALLLRATFYLLIGNANAAPDLDKVISLKEANV  
KLRANALIKRGSMMYQQQQPLLSTQDFNMAADIDPQNADVHHRGQLKILLDQVEEAVAD  
FDECIRLRPESALAAQAQKCFALYRQAYTGNNSSQIQAAMKGFEEVIKKFPRCAEGYALYA  
QALTDQQQFGKADEMYDKCIDLEPDNATTYVHKGLLQLQKQDLDRGLELISKAIEIDNKC  
DFAYETMGTIEVQRGNMEKAIDMFNKAINLAKSEMMAHLYSLCDAAHAQTEVAKKYGLK  
PPTL

>O95258

MGIIFPGIILIFLVRKFATAAVIVSGHQKSTTVSHEMSGLNKPFPVYGGGLASIVAEFGTFPV  
DLTKTRLQVQGSIDARFKEIKYRGMFHALFRICKEEGVLALYSGIAPALLRQASYGTIK  
IGIYQSLKRLFVERLEDETLINMICGVVSGVISSTIANPTDVLKIRMQAQGSLLFQGSMI  
GSFIDIYQQEGTRGLRGVPTAQRAAIVVGVELPVYDITKKHLILSGMMGDTILTHFVSS  
FTCGLAGALASNPVDVVRTRMMNQRAIVGHVDLYKGTVDGILKMKHEGFFALYKGFPNLR  
LGPNIIFFITYEQLKRLQI

>O95674

MTELRQRVAHEPVAPPEDKESSEAKVDGETASDSESRAESAPLPVSADDTPEVLNRALS  
NLSSRKNVRGILTLAMIAFFFFIIYLGPMVLMIVMCVQIKCFHEIITIGYNVYHSYDLP  
FRTLSYFLLCVNYFFYGETVTDYFFTLVQREEPLRILSKYHRFISFTLYLIGFCMFVLSL  
VKKHYRLQFYMFGTHVTLIVVTQSHLVIHNLFEGMIFIVPISCVICNDIMAYMFGFFFFG  
RTPLIKLSPKKTEGFIGGFFATVVFGLLLSYVMGRCFVCPVEYNNDTNSFTVDCEPSD  
LFRLQEYNIIPGVIQSVIGKTVRMYPFQIHSIALSTFASLIGPFGGFFASGFKRAFKIKDF  
ANTIPGHGGIMDRFDCQYLMATFVNVYIASFIRGPNPSKLIQQFLTLRPDQQQLHIFNTRL  
SHLIDKGMTSTTEDE

>P00156

MTPMRKINPLMKLINHSFIDLPTPSNISANFGSLLGACLILQITTTGLFLAMHYS PDASTA  
FSSIAHITRDVNYGIIRYLHANGASMFFICLFLHIGRGLYGSFLYSETNIGIILLLATM  
ATAFMGYVLPQGMSFGATVITNLLSAIPYIGTDLVQIGGYSVDSPTLTRFFTFHFILPFI  
IAALATLHLLFLHETGSNNPLGITSHSDKITFHPYYTIKDALGLLLFLLSLMTLTLFSPD  
LLGDPDNYTLANPLNTPPHIKPEYFLFAYTILRSVPNKLGGVLALLLSILILAMIPILHM  
SKQQSMMFRPLSQSLYLLAADLLILTIGGQPVSYPFTIIGQVASVLYFTTILILMPTISL  
IENKMLKA

>P00414

MTHQSHAYHMVKPSPPLTGALSALLMTSGLAMFHFHSM TLLMLGLLTNTLTMYQRDVTRE  
STYQGHHTPPVQKGLRYGMILFITSEVFFFAGFFAFYHSSLAPTQQLGGHPPTGITPLNP  
LEVPLLNTSVLLASGVSITAHHSLMENNQNMIQALLITILLGLYFTLLQASEYFESFFT  
ISDGIYGSTFFVATGFHGLHVIIGSTFLTICFIRQLMFHFTSKHHFGFEAAAYHFVDVVL  
FLYVSIYGS

>P0C869

MAVAEVSRTCLLTVRVLQAHRLPSKDLVTPSDCYVTLTLLPTACSHRLQTRTVKNSSSPVNQ  
SFHFRIHRQLKKNVMEKLVFDQDLVTGDDPVLSVLF DAGTLRAGEFRRESFSLSPQEGEGR  
EVEFRLQSLADRGELVSNGLVARELSCLHVQLEETGDQKSSEHRVQLVVP GSCEGPQEA  
SVGTGTRFRHCPACEQELSIRLQDAPEEQKAPLSALPSGQVVRLVFPPTSQEPLMRVELK  
KEAGLRELAVRLGFGPCAEEQAFLSRRKQVVAALRQALQLDGDLDQEDEIPVVAIMATGG  
GIRAMTSLYGQLAGLKEGLLDCVSYITGASGSTALANLYEDPESQKDLAGPTELLKTQV  
TKNKLGV LAPSQ LQRYRQELAEERARLGYPSCF TNLALINEALLHDEPHDHLSDQREALS  
HGQNPLPIYCALNTKGQSLTTFEFGECEFSPEYEVGFPKYGAFIPSE LFGSEFFMGQLMKR  
LPESRICFLEGISNLYAANLQDSLYASEPSQFDRVRNQNLDKEQVPLLKIEEPPSTAGR  
IAEFFTDLLTRPLAQATHNFLRGLHFHKDYFQHPHFSTKATTL DGLPNQLTPSEPHLCLL  
DVGYLINTSCLPLLQPTRDLDLILSLDYNLHGAFQQLQLLGRFCQE QGIPFPPI SPSPEE  
QLQPRECHTFSDPTCPGAPAVLHFPLVSDSFREYSAPGVRRTPEEAAAGEVNLSSSDSPY  
HYTKVTYSQEDVDKLLHLTHYINVCNNQEQLLEALRQAVQRRRQRRPH

>P10176

MSVLTPLLLRGLTGSARRLPVPRAKIHS LPPPEGKLGIMELAVGLTSCFVTFLLPAGILSH  
LETYRRPE

>P19099

MALRAKAEVCVAAPLSLQRRARALGTRARAPRTVLPFEAMPQHPGNRLRLLQIREQGYEH  
LHLEMHQTFQELGPIFRYNLGGPRMVCVMLPEDVEK LQQVDSLHPCRMILEPVAYRQHRG  
HKCGVFLNNGPERFNRLRLNPDVLSPKAVQRFLPMVDAVARDFSQALKKKVLQ NARGSLT  
LDVQPSIFHYTIEASNLALFGERLGLVGHS PSSASLNFLHALEVMFKSTVQLMFMPRSLS  
RISPKVKEHF EADCFQYGDNCIQKIYQELAFNR PQHYTGIVAELLLKAELSLEAIKANS  
MELTAGSVDTTAFPLLMTLFELARNPDVQQILRQESLAAAASISEHPQKATTELP LLRAA  
LKETLRLYPVGLFLERVVSSDLVLQNYHIPAGTLVQVFLYSLGRNAALFPRPERYNPQRL  
DIRGSGRNFHHVDFGFGMRQCLGRRLAEAEMLLLLHHV LKHFLVETLTQEDIKMVYSFIL  
RPGTSPLLTFRAIN

>P22557

MVTAAMLLQCCPV LARGPTSLLGKVVKTHQFLFGIGRCPILATQGPNC SQIHLKATKAGG  
DSPAAGHC PFMLSELQDGKSKIVQKAAPEVQEDVKAFKTDLPSSLVSVSLRKPFS GPQE  
QEQISGKVTHLIQNNMPGNVYVFSYDQFFRDKIMEKKQDHTYRVFKTVNRADAYPFAQHFS  
EASVASKDVSVCNDYLGMSRHPQVLQATQETLQRHGAGAGGTRNISGTSKFHVELEQEL  
AELHQKDSALLFSSCFVANDSTLFTLAKILPGCEIYSDAGNHASMIQGI RNSGAAKFVFR  
HNDPDHLKLLKLEKSNPKIPKIVAFETVHSM DGAICPLEELCDVSHQYGALTFVDEVHAVG  
LYGSRGAGIGERD GIMHKIDIISGTLGKAFGCVGGYI ASTRDLVDMVRSYAAGFI FTTSL  
PPMVLSGALESVRLKKEEGQALRRHQ RNVKHMRQLLMDRGLPVI PCPSHIIP IRVGN  
ALNSKLCDLLLSKHGIYVQAINYPTVPRGEELLRLAPSPHHS PQMMEDFVEKLLLATAVG  
LPLQDVSVAACNFCRRPVHFE LMSEERSYFGNMGPQYVTTYA

>P23368

MLSRLRVVSTTCTLACRHLHIKEKGKPLMLNPR TNKGMAFTLQERQMLGLQGLLPPK IET  
QDIQALRFHRNLKMTS PLEKYIYIMGIQERNEKLFYRILQDDIESLMP IYVTPVGLAC  
SQYGHIFRRPKGLFISISDRGHVRSIVDNPENHV KAVVVTDGERILGLGDLGVYGMGIPV  
GKLCLYTACAGIRPDRCLPVCIDVGTDNIAL LKDPFYMGLYQKRDR TQQYDDLIDEFMKA  
ITDRYGRNTLIQFEDFGNHNAFRFLRKYREKYCTFNDDIQGTA AVALAGLLAAQKVISKP  
ISEHKILFLGAGEAALGIANLIVMSMVENGLSEQEAQKKIMFDKYGLLVKGRKAKIDSYQ

EPFTHSAPESIPDTFEDAVNILKPSTIIGVAGAGRLFTPDVIRAMASINERPVI FALSNP  
TAQAECTAEEAYTLTEGRCLFASGSPFGPVKLT DGRVFTPGQGNVYIFPGVALAVILCN  
TRHISDSVFLEAAKALTSQLTDEELAQGRLYPPLANIQEVSINIAIKVTEYLYANKMAFR  
YPEPEDKAKYVKERTRSEYDSLLPDVYEPESASSPPVITE

>P25874

MGGLTASDVHPTLGVQLFSAGIAACLADVITFPLDTAKVRLQVQGECP TSSVIRYKGVLG  
TITAVVKTEGRMKLYSGLPAGLQRQISSASLRIGLYDTVQEFLTAGKETAPSLGSKILAG  
LTTGGVAVFIGQPTEVVKVRLQAQSHLHGKIPRYTGTYNAYRI IATTEGLTGLKGTTPNL  
MRSVIINCTELVTYDLMKEAFVKNNILADDVPCHLVSALIAGFCATAMSSPVDVVKTRFI  
NSPPGQYKSVPCAMKVFTNEGPTAFFKGLVPSFLRLGNSVIMFVCFEQLKRELSKSRQT  
MDCAT

>P27144

MASKLLRAVILGPPGSGKGTVCQRIAQNFGQLQHLSSGHFLRENIKASTEVGEMAKQYIEK  
SLLVDPDHVITRLMMSELENRRGQHLLDGFPRTLGQAEALDKICEVDLVISLNIPFETLKD  
RLSRRIHPPSGRVYNLDFNPPHVHGI DDVTGEPLVQQEDDKPEAVAARLRQYKDVAKPVI  
ELYKSRGVLHQFSGTETNKIPYVYTLFSNKITPIQSKEAY

>P27338

MSNKCDVVVVGGGIGMAAAKLLHDSGLNVVLEARDRVGGRTYTLRNQKVKYVDLGGSY  
VGPTQNRILRLAKELGLETYKVNEVERLIHHVKGKSYPPFRGPFPPVNPITYLDHNNFRM  
DDMGREIPSDAPKAPLAEEDNMTMKELLDKLC TESAKQLATLFVNLCVTAETHEVSALFL  
YVKQCGGTTRIISTTNGGQERKFVGGSGQVSERIMDLLGDRVKLERPVIYIDQTRENVLV  
ETLNHEMYEAKYVISAI PPTLGMKIHFNPLPMMRNQMI TRVPLGSVIKIVYYKEPFRK  
KDYCGTMIIDGEEAPVAYTLDDTKPEGNYAAIMGFILAHKARKLARLTKEERLKKLCELY  
AKVLGSLEALEPVHYEKNCEEQYSGGCYTTYFPPGILTQYGRVLRQPVDRIYFAGTETA  
THSGYMEGAVEAGERAAREILHAMGKIPEDIQSEPE SVDVPAQPITTTFLERHLPSPVG  
LLRLIGLTTIF SATALGFLAHKRGLLVRV

>P29803

MLAAAFISRVLRVAQKSARRVLVASRNSNDATFEIKKCDLYLLEEGPPVTTVLTRAEG  
KYYRMMLTVRRMELKADQLYKQKFI RGFCHLCDGQEACCVGLEAGINPSDHVITSYRAHG  
VCYTRGLSVRSILAELTGRRGCAKKGKSMHMYTKNFYGGNGIVGAQGPLGAGIALACK  
YKGNDEICLTLYGDGAANQGQIAEAFNMAALKLPCVFI CENNL YGMGTSTERAAASPDYY  
KRGNFIPGLKVDGMDVLCVREATKFAANYCRSGKGPILMELQTYRYHGHSMSPGVSYRT  
REEIQEVRSKRDP I I I LQDRMVNSKLATVEELKEIGAEVRKEIDDAAQFATTDPEPHLEE  
LGHHIYSSDSSFVIRGANPIKFKSVS

>P36404

MGLLTILKMKQKERELRLLMLGLDNAGKTTILKKNFNGEDIDTISPTLGFNIK TLEHRGF  
KLNIDVGGQKSLRSYRNYFESTDGLIVVDSADRQRMQDCQRELQSL LVEERLAGATLLIF  
ANKQDLPGALSSNAIREVLELDSIRSHHCIQGC SAVTGENLLPGIDLDDISSRIFTAD

>P40305

MEASALTSSAVTSVAKVVRVASGS AVVLPLARIATVVIGGVAVPMVLSAMGFTAAGIAS  
SSIAAKMMSAAA IANGGGVASGSLVATLQSLGATGLSGLTKFILGSIGSAIAAVIARFY

>P49419

MRLPRALCVHAAKTSKLSGSPRPAAFMSTLLINQPQYALKE LGLREENEGVYNGSGGRGE  
VITTYCPANNEPIARVRQASVADYEETVKKAREAKIADI PAKRGEIVRQIGDALREKIQ

VLGSLVSLEMGKILVEGVGEVQEYVDICDYAVGLSRMIGGPILPSESRGHALIEQNPVGL  
VGIITAFNFPVAVYGNNAIAMICGNVCLKGAPTTSLISVAVTKIIAKVLEDNKLPGAICS  
LTCGGADIGTAMAKDERVNLLSFTGSTQVGKQVGLMVQERFGRSLELGGNNAI IAFEDA  
DLSLVVPSALFAAVGTAGQRCTTARRLF I HESI HDEVVNRLK KAYAQIRVGNPDPNVLYG  
PLHTKQAVSMFLGAVEEAKKEGGTVVYGGKVM DRPGNYVEPTIVTGLGHDASIAHTETFA  
PILYVFKFKNEEEVFANNEVKQGLSSSI FTKDLGRIFRLGPKGSDCGIVNUNIPTS GAEI  
GGAFGGEKHTGGGRESGSDAKQYMRRSTCTINYSKDLPLAQGIKFQ

>P49448

MYRYLAKALLPSRAGPAALGSAANHSAALLGRGRGQPAAASQPLALAAARRHYSELVADR  
EDDPNFFK MVEGFFDRGASIVEDKLVKDLRTQESEEQKRNRV RGI LR I KPCNHVLSLSF  
PIRRDDGSEVIEGYRAQHSQHRTPCGGIRYSTDVS VDEVKALASLMTYKCAVVDV PFGG  
AKAGVKINPKNYTENELEK I TRRF TMELAKKGF I GPGVDVPAPDMNTGEREMSIADTYAS  
TIGHYDINAHACVTGKPISQGGIHGRISATGRGVFHGIENFINEASYMSILGMTPGFRDK  
TFVVQGFQGNVGLHSMRYLHRFGAKCIAVGESDGSINPDGIDPKELEDFKLQHGSI LGFPK  
AKPYEGSILEVDCILIPAAATEKQLTKSNAPRVKAKI I AEGANGPTTPEADKIFLERNIL  
VIPDLYLNAGGVTVSYFELKNLNHVSYGRLTFKYERDSNYHLLLSVQESLERKFGKHGGT  
IPIVPTAEFQDSISGASEKDIVHSALAYTMERSARQIMHTAMKYNLGLDLRTAAYVNAIE  
KVFKVYSEAGVTFT

>P49675

MLLATFKLCAGSSYHRMRNMKGLRQQAVMAISQELNRRALGGPTPSTINQVRRRSSLLGS  
RLEETLYSDQELAYLQQGEEAMQKALGILSNQEGKKE SQDNGDKVMSKVVPDVGKVFRL  
EVDVQPMERLYEELVERMEAMGENPNVKEIKVLQKIGKDTF I THELAAEAAGNLV GPRD  
FVSVRCAKRRGSTCVLAGMATDFGNMPEQKGVIRAEHGPTCMVLHPLAGSPSKTKLTLLS  
IDLKGLPKSIINQVLSQTQVDFANHLRKRLESH PASEARC

>P50336

MGRTVVVLGGGISGLAASYHLSRAPCPPKVVLVLESSERLGGIRSVRGPNGAIFELGPRGI  
RPAGALGARTLLLVSELGLDSEVL PVRGDHPAAQNRFLYVGGALHALPTGLRGLLRPSPP  
FSKPLFAGLRELTKPRGKEPDETVHSFAQRRLGPEVASLAMDSL CRGVFAGNSRELSIRS  
CFPSLFQAEQTHRSILLG LLLGAGRTPQ PDSALIRQALAE RSQSLRGGLEMLPQALETHL  
TSRGVSVLRGQPVCGLSLQAEGRKVS LRDSSEADHVISAIPASVLSELLPAEAA PLARA  
LSAITAVSVAVVNLYQGAHLPVQGFHLPVPSSEDPGVLGIVYDSVAFPEQDGSPPGLRV  
TVMLGGS LQTL EASGCVLSQELFQQRAQEAAATQLGLKEMPSHCLVHLHKNCIPQYTLGH  
QKLESARQFLTAHRLPLTLGAS YEGVAVNDCIESGRQAAVSVLGT EPNS

>P55851

MVGFKATDVPPATVVKFLGAGTAACIADLITFPLDTAKVRLQIQGESQGPVRATAS AQYR  
GVMGTILTMVRTEGPRSLYNGLVAGLQRQMSFASVRI GLYDSVKQFYTKGSEHASIGSRL  
LAGSTTGALAVAVAQPTDVVKVRFQAQARAGGRRYQSTVNAYKTIAREEGFRGLKGTSP  
NVARNAIVNCAELV TYDLIKDALLKANLMTDDL PCHFTSAFGAGFCTTVIASPVDVVKTR  
YMNSALGQYSSAGHCAL TMLQKEGPRAF YKGFMP SFLRLG SNVVMFVTYEQLKRALMAAC  
TSREAPF

>P55916

MVGLKPSDVPPTMAVKFLGAGTAACFADLVTFPLDTAKVRLQIQGENQAVQ TARLVQYRG  
VLGTILTMVRTEGPCSPYNGLVAGLQRQMSFASIRIGLYDSVKQVYTPKGADNSSLTTRI  
LAGCTTGAMAVTCAQPTDVVKVRFQAS IHLGPSRSDRKYSGTMDAYRTIAREEGVRGLKG



TLPNIMRNAIVNCAEVVTYDILKEKLLDYHLLTDNFPCHFVSAFGAGFCATVVASPVVDV  
KTRYMNSPPGQYFSPLDKMIKMQAEGPTAFYKGFTPSFLRLGSNVVMFVTYEQLKRALM  
KVQMLRESPF

>P60602

MPVAVGPYQSQPSCFDRVKMGFVMGCAVGMAGALFGTFSLRIGMRGRELMGGIGKTM  
MQSGGTFGTFMAIGMGIRC

>P62072

MDPLRAQQQLAAELEVEEMMADMYNRMTSACHRKCVPPHYKEAELSKGESVCLDRCVSKYLD  
IHERMGKKLTELSMQDEELMKRVQQSSGPA

>Q00796

MAAAAKPNNLSLVVHGPGDLRLENYPIPEPGPNEVLLRMHMSGICGSDVHYEYGRIGNFI  
VKKPMVLGHEASGTVEKVGSSVKHLKPGDRVAIEPGAPRENDEFCKMGRYNLSPSIFFC  
TPPDDGNLCRFYKHNAAFYKLPDNVTFEEGALIEPLSVGIHACRRGGVTLGHKVLVCGA  
GPIGMVTLVAKAMGAAQVVVTDLSATRISKAKEIGADLVLQISKESPOEIAARKVEGQLG  
CKPEVTIECTGAEASIQAGIYATRSGGNLVLVGLGSEMTTVPLLHAAIREVDIKGVFRYC  
NTPVAISMLASKSVNVKPLVTHRFPLEKALEAFETFKKGLGLKIMLKCPSDQNP

### (8) 30 nuclear proteins

>O14802

MVKEQFRETDAKKISHICFGMKSPEEMRQQAHIQVVSKNLYSQDNQHAPLLYGVLDHRM  
GTSEKDRPCETCGKNLADCLGHYGYIDLELPCFHVGYFRAVIGILQMICKTCCHIMLSQE  
EKKQFLDYLRPGLTYLQKRGLKKKISDKCRKKNICHHCAGFNGTVKKCGLLKIIHEKYK  
TNKKVVDPIVSNFLQSFETAIEHNKEVEPLLGRAQENLNPLVVLNLFKRI PAEDVPLLLM  
NPEAGKPSDLILTRLLVPLLCIRPSVVS DLKSGTNEDDLTMKLTEIIFLNDVIKKHRISG  
AKTQMIMEDDFLQLQCALYINSELGIPLNMAPKKTRGFVQRLKGGKQGRFRGNLSGKRVD  
FSGRTVISPDNLRIDEVAVPVHVAKILTFPEKVNKANINFLRKLQVNGPEVHPGANFIQ  
QRHTQMKRFLKYGNREKMAQELKYGDIVERHLIDGDVVLFNRPQLHKLKLSIMAHLARVKP  
HRTFRFNECVCTPYNADFDGDEMNLHLPQTEEAKAEALVLMGTKANLVTPRNGEPLIAAI  
QDFLTGAYLLTLKDTFFDRAKACQIIASILVGKDEKIKVRLPPPTILKPVTLTGKQIFSV  
ILRPSDDNPVRANLRTKGKQYCGKGEDLCANDSYVTIQNSELMMSGMDKGTGSGSKNNI  
FYILLRDGQNEAADAMSRLARLAPVYLSNRGFSIGIGDVT PGQGLLKAKYELLNAGYKCC  
DEYIEALNTGKLQQQPGCTAEETLEALILKELSVIRDHAGSACLRELDKSN SPLTMALCG  
SKGSFINISQMIACVQQQAISGSRVPDGFENRSLPHFEKHSKLPAAKGFVANSFYSGLTP  
TEFFFHTMAGREGLVDTAVKTAETGYMQRRLVKSLEDLCSQYDLTVRSSTGDI IQFIYGG  
DGLDPAAMEGKDEPLEFKRVLDNIKAVFPCPSEPALSKNELILTTE SIMKKSEFLCCQDS  
FLQEIKKFIKGVSEKIKKTRDKYGINDNGTTEPRVLYQLDRITPTQVEKFLETCDKYM  
AQMEPGSAVGALCAQSIGEPGTQMTLKTFFHAGVASMNITLGVPRIKEIINASKAISTPI  
ITAQLDKDDDADYARLVKGRIEKTLLGEISEYIEEVFLPDDCFILVKLSLERIRLLRLEV  
NAETVRYSICTSKLRVKPGDVAVHGEAVVCVTPRENSKSSMYVVLQFLKEDLPKVVVQGI  
PEVSRAVIHIDEQSGKEKYKLLVEGDNLRAVMATHGVKGTRTTSNNTYEVEKTLGIEAAR  
TTINEIQYTMVNHGMSIDRRHVMLLSDLMTYKGEVLGITRFGGLAKMKESVLM LASFEKT  
ADHLFDAAYFGQKDSVCGVSECIIMGIPMNIGTGLFKLLHKADRDPNPPKRPLIFDTNEF  
HIPLVT

>O15016

MARNCSCEKRAAHILCTYCNRLCSSCTEEHRHSPVPGGPFPPRAQKSGSPVNGGPGDF



ALRRRSLRSHARRRRPPPPPPPPPRAYEPRSEFEQMTILYDINSGLDSEDMSYLRRLTYE  
RLLQQTSGADLNDTHVHHTITNLTPKRKRRPQDGPREDHQTGSARSEGYYPISKKEKDKY  
LDVCPVSARQLEGVDTQGTNRVLSERRSEQRLLSAIGTSAIMSDLLKLNQLKFRKKKL  
RFRGRSRIHEGLFAMEPIAADEMVIYVQONIRQMVADMREKRYVQEGIGSSYLFRVDHDT  
IIDATKCGNLARFINHCCTPNCYAKVITIESQKKIVIYSKQPIGVDEEITYDYKFPLEDN  
KIPCLCGTESCRGSLN

>O15084

MSRVCIVVLEEEVEDESPAFISKLPQENKSLHSPPSGNVLVRYPSLVQAI FNGDPDEVRAL  
IFKKEDVNFQDNEKRTPLHAAA YLGDAEII ELLILSGARVNAKDSKLTPLHRAVASCSEE  
AVQVLLKHSADV NARDKNQTP LHIAAANKAVKCAEALVPLLSNVNVSDRAGRTALHHA AF  
SGHGEMVKLLLSRGANINAFDKKDRRAIHAA YMGHIEVVKLLVSHGAEVTCKDKKSYT PL  
HAAASSGMI SVVKYLLDLGVDMNEPNAYGNTPLHVACYNGQDVVVNELIDCGAIVNQKNE  
KGFTPLHFAAASTHGALCLELLVGN GADVNMSKSDGKTP LHMTALHGRFSRSQTIIQSGA  
VIDCEDKNGNTPLHIAARYGHELLINTLITSGADTAKRGIHGMFPLHLAALSGFSDCCRK  
LLSSGFIDITPDDFGRTCLHAAAAGGNLECLNLLLNTGADFNKKDKFGRSPLHYAAANCN  
YQCLFALVGS GASVNDLDERGCTPLHYAATSDTDGKCLEYLLRNDANPGIRDKQGYNAVH  
YSAAYGHRLCLQLIASETPLDVL METSGTDMLS DSDNRATISPLHLAAYHGHHQALEVLV  
QSLLDLDVRNSSGRTPLDLAAFKGHVECDV L INQGASILVKDYILKRTP IHAAATNGHS  
ECLRLLIGNAEPQNAVDIQDNGQTPLMLS VLNIGHTDCVYSLLNKGANVDAKDKGRTALH  
RGAVTGHEECVDALLQHGA KCLLRDSRGRTP IHLSAACGHIGVLGALLQSAASMDANPAT  
ADNHGYTALHACYNGHETCVELLLEQEVFQKTEGNAFSP LHCAVINDNEGAAEMLIDTLG  
ASIVNATDSKGRTP LHAAAFTDHVECLQLLLSHNAQVNSVDSTGKTP LMMAAENGQTN TV  
EMLVSSASAELTLQDNSKNTALHLACSKGHETSALLILEKITDRNLINATNAALQTP LHV  
AARNGLT MVVQELLGKGASVLAVDENGYTPALACAPNKDVADCLALILATMMPVSSSSPL  
SSLTFNAINRYTNTSKT VSF EALPIMRNEPSSYCSFNNIGGEQEYLYTDVDELNDS DSET  
Y

>O15151

MTSFSTSAQCSTSDSACRISPGQINQVRPKLPLLKILHAAGAQQEMFTVKEVMHYLGQYI  
MVKQLYDQQEQHMVYCGDLLGELLGRQSF SVKDPSPLYDMLRKNLVTLATATTDAAQTL  
ALAQDHSMDIP SQDQLKQSAEESSTSRKRTTEDDIPTLPTSEHKCIHSREDEDLIENLAQ  
DETSRLDLGFEE DVAGLPFLGNLRSNYTPRSNGSTDLQTNQDVGTAI VSDTTDDLFLNES  
VSEQLVGVIKVEAADTEQTSEEVGKVS DKKVIEVGKNDDLED SKSLSDDTDVEVTSEDEQ  
CTECKKFNSPSKRYCFRCALRKDYSDCSKLTHSLSTSDITAIPEKENEGNDVPDCRRTIS  
APVVRPKDAYIKKENS KLFDP CNSVEFLDLAHSSESQETISSMGEQLDNLSEQR TD TENM  
EDCQNLLKPCSLCEKRPRDGNIIHGRTGHLVTCFHCARRLKKAGASCPICKKEIQLVIKV  
FIA

>O15156

MGSPEDDLIGIPFPDHSSSELLSCLNEQRQLGHLCDLTI RTQGLE YRTHR AVLAA CSHYFK  
KLFTEGGGGAVMGAGSGTATGGAGAGVCELD FVGPEALGALLEFAYTATLTTSSANMPA  
VLQAARLLEIPCVIAACMEILQGGSGLEAPSPDEDDCERARQYLEAFATATASGVPNGEDS  
PPQVPLPPPPPPPPR PVARRSRKPRKAFLQTKGARANHLVPEVPTVPAHPLTYEEEEVAG  
RVGSSGGSGPGDSYSPPTGTASPPEGPQSYEPYEGEEEEELVYPPAYGLAQGGGPPLSP  
EELGSDEDAIDPDL MAYLSSLHQDNLAPGLDSQDKLVRRRSQMPQECPVCHKI IHGAGK  
LPRHMRTHTG EKPFACEVCGVRFTRNDKLIKIHMRKHTGERPYSCPHCPARFLHSYDLKNH

MHLHTGDRPYECHLCHKAFKEDHLQRLKGNCLVTRRRRKDDAPPHYPPPSTAAAS  
PAGLDLSNGHLDTFRLSLARFEQSAPTGPPVSTPGPPDDEEEGAPTTQAEGAMESS  
>O15178

MSSPGTESAGKSLQYRVDHLLSAVENELQAGSEKGDPTERELRVGLEESELLRFKELTNE  
MIVTKNGRRMFPVLKVNVSGLDPNAMYSFLDFVAADNHRKYVNGEVPGGKPEPQAPSCV  
YIHPDSPNFGAHMKAPVSFSKVKLTNKLNGGGQIMLNSLHKYEPRIHIVRVGGPQRMITS  
HCFPETQFIAVTAYQNEEITALKIKYNPFAKAFDAKERSDHKEMMEEPQDSQQPGYSQG  
LLPGTSTLCPANPHQPFGGALSPLSTHSCDRYPTLRSHRSPYPSPYAHNNNSPTYSDN  
SPACLMLQSHDNSSLGMPAHPMLPVSHNASPPTSSSQYPSLSVSNGAVTPGSQAAAVS  
NGLGAQFFRGSAPAHYTPLTHPVSAOSSSSGSPLYEGAAAATDIVDSQYDAAAQGRLIASTP  
VSPPSM

>O15265

MSERAADDVRGEPRAAAAAGGAAAAAARQQQQQQQQQPPPPQPQRQQHPPPPRRTRP  
EDGGPGAASTSAAAMATVGERRPLPSPEVMLGQSNLVEASKLPGKDGTEDESFKFEGKN  
REVMGLCREDMPIFGFCPAHDDFYLVVCNDCNQVVKPQAFQSHYERRHSSSSKPLAVPP  
TSVFSFFPSSLSKSKGGSASGSNRSSSGVLSASSSSSKLLKSPKEKLQLRGNTRPMHPIQ  
QSRVPHGRIMTPSVKVEKIHPKMDGTLKSAVGPTCPATVSSLVKPLNCPSIPKPTLPS  
PGQILNGKGLPAPPTLEKKPEDNSNNRKLFLNKRLSEREFDPDIHCGVIDLDTKKPCRSL  
TCKTHSLTQRRAVQGRKRFDVLLAEHKNKTREKELIRHPDSQQPPQPLRDPHPAPPRTS  
QEPHQNPBGVPIPSESKPFVASKPKPHTPSLPRPPGCPAQGGGSAPIIDPPVHESHPPLP  
ATEPASRLSSEEGEGDDKEESVEKLDCHYSGHHPQPASFCTFGSRQIGRGYVFDNRNL  
RCALNLMVEKHLNAQLKKIPVPSTTSPISTRIPHRTNSVPTSQCGVSYLAAATVSTSPV  
LLSSTCISPNSKSVPAHGTTLNAQPAASGAMPVCSMQSRQVSSSSSSPSTPSGLSSVPS  
SPMSRKPQKLKSSKSLRPKESSGNSTNCQNASSSTSGGSGKKRKNSSPLLHSSSSSSSS  
SSSSHSMESFRKNCVAHSGPPYPSTVTSSSHIGLNCVTNKANAVNVRHDQSGRGPPTGSP  
AESIKRMSVMVNSSDSTLSLGPFIHQSNELPVNSHGSFSSHSTPLDKLIGKKRKCSPSSS  
SINSSSKPTKVAKVPVANNVHMKHTGTIPGAQGLMNSSLHQP KARP

>O15350

MAQSTATSPDGGTTFEHLSSLEPDSTYFDLPQSSRGNNVVGGTDSSMDVFHLEGMTTSV  
MAQFNLLSSTMDQMSSRAASASPYPTEHAASVPTHSPYAQPSSTFDTMSPAPVI PSNTDY  
PGPHHFEVTFQOSSTAKSATTYSPLLKLYCQIAKTCPIQIKVSTPPPPGTAIRAMPVYK  
KAEHVTDVVKRCPNHELGRDFNEGQSAPASHLIRVEGNNLSQYVDDPVTGRQSVVVPYEP  
PQVGTEFTTILYNFMCNSSCVGGMNRRPILIIITLEM RDGQVLGRRSFEGRICACPRDR  
KADEDHYREQQALNESSAKNGAASKRAFKQSPPAVPALGAGVKRRRHGDEDTYYLQVRGR  
ENFEILMKLKESELELMELVPQPLVDSYRQQQLLQRPSHLQPPSYGPVLSPMNKVHGGMN  
KLPSVNQLVGQPPPHSSAATPNLGPVGPMLNNHGHAVPANGEMSSSSHAQSMVSGSHCT  
PPPPYHADPSLVSFLTGLGCPNCIEYFTSQGLQSIYHLQNLTIEDLGALKIPEQYRMTIR  
GLQDLKQGHDYSTAQQLLRSSNAATISIGGSGELQRQRVMEAVHFRVRHTITIPNRGGPG  
GGPDEADFGFDLPDCKARKQPIKEEFTEAEIH

>O15353

MVSLPPPQSDVTLPGPTRLEGERQGDLMQAPGLPGSPAPQSKHAGFSCSSSFVSDGPPERT  
PSLPPHSPRIASPGPEQVQGHCPAGPGPGPFRLSPSDKYPGFGFEEAAAASSPGRFLKGS  
APFHYPYKRPFHEDVFPAAETTLALKGHSFKTPGLEAFEEIPVDVAEAEAFPLPGFSAEAC  
NGLPYPSQEHGPQVLGSEVKVKPPVLESAGMFCYQPPLQHMYCSSQPPFHQYSPGGGSY

PIPYLGSSHYQYQRMAPQASTDGHQPLFPKPIYSYSILIFMALKNSKTGSLPVSEIYNFM  
TEHFPYFKTAPDGKNSVRHNLSLNKCFEKVENKSGSSSRKGCLALNPAKIDKMQEELQKK  
RKDP IAVRKSMAKPEELDSLIGDKREKLGSPLLGCPPPGLSGSGPIRPLAPPAGLSPPLH  
SLHPAPGPIPGKNPLQDLLMGHTPSCYQOTYLHLSPLGAPPGPPQPLFPQPDGHLELRAQ  
PGTPQDSPLPAHTPPSHSAKLLAEPSPARTMHDTLPLDGLGTDLDAINPSLTDLDFDQGN  
LEQLKDDSLALDPLVLVTSSPTSSSMPPPQPPHCFPPGCLTETGSGAGDLAAPGSGGS  
GALGDLHLTTLYSAFMELEPTPPTAPAGPSVYLSPPSSKPVALA

>O15504

MAICQFFLQGRCRFGDRCNEHPGARGAGGGRQQPQQQPSGNNRRGNTTSQRYSNVIQPSS  
FSKSTPGGSRDQEKPYFSSFDGASTNRKEGFGLSENPFASLSPDEQKDEKLLLEGIVKD  
MEVESSGQMFVSPVKKKPNISGFTDISPEELRLEYHNFLTSNNLQSYLNSVQRLINQR  
NRVNELKSLNISTKVALLSDVKDGVNQAAPAFGFGSSQAATFMSPGFVNNSSSDNAQNF  
SFKTNSGFAAASSGSPAGFGSSPAFGAAASTSSGISTSAFAGFGKPEVTSAAFSFKSP  
AASSFGSPGFSGLPASLATGPVRAPVAPAFGGSSVAGFGSPGSHSHTAFSKPSSDTFGN  
SSISTSLSASSSIATDNVLFTPRDKLTVEELEQFQSKKFTLGKIPLKPPPLELLNV

>O43189

MAQPPRLSRSGASSLDPASPAPTSRPRRLEGQDVLARTDGLLYLGTIKKVDSAREVCLV  
QFEDDSQFLVLKDISPAALPGEELLCCVCRSETVVPGNRLVSCEKCRHAYHQDCHVPRAP  
APGEGEGTSVCRQCVFAIATKRGGALKKGPYARAMLGMKLSLPYGLKGLDDAGHLSNRQQ  
SYCYCGGPGENLKMQLQCRSCLQFHEACTQCLSKPLLYGDRFYEFECVCRGGPEKVRRLQ  
LRVDVAHLVLYHLSVCCKKKYFDFDREILPFTSENDSLLLGEISDTPKGERSSRLLSALN  
SHKDRFISGREIKKRKCLFGLHARMPPPVEPPTGDGALTSFPGQGGVSRPLGKRRR  
PEPELRRRQKGVVEELGPPSAVRNQPPEPQEQRERAHLQRALQASVSPSPSPNQSYQGS  
SGYNFRPTDARCLPSSPIRMFASFHPSASTAGTSGDSGPPDRSPLELHIGFPTDIPKSAP  
HSMTASSSSVSSPSPGLPRRSAPPSPLCRSLSPGTGGGVRRGGVGYLSRGDPVRVLARRVR  
PDGSVQYLVEGGGGIF

>O43248

MFNSVNLGNFCSPSRKERGADFGERGSCASNLYLPSTYYMPEFSTVSSFLPQAPSRQIS  
YPYSAQVPPVREVSYLEPSGKHHRNSYSSCYAAADELMHRECLPPSTVTEILMKNEGSY  
GGHHHPSAPHATPAGFYSSVNKNSVLPQAFDRFFDNAYCGGGDPPAEPPCSGKGEAKGEP  
EAPPASGLASRAEAGAEAEAEENTNPSSSGSAHSVAKEPAKGAAPNAPRTRKKRCPYSK  
FQIRELEREFFFNVYINKEKRLQLSRMLNLTDRQVKIFQNRMMKEKKLSRDLQYFSGNP  
LL

>O43316

MHQDGISSMNQLGGLFVNGRPLPLDTRQQIVRLAVSGMRPCDISRILKVSNGCVSKILGR  
YYRTGVLEPKGIGGSKPRLATPPVVARIAQLKGECPALFAEIQRQLCAEGLCTQDKTPSV  
SSINRVLRALQEDQGLPCTRLRSPAVLAPAVLTPHSGSETPRGTHPGTGHRNRTIFSPSQ  
AEALEKEFQRGQYPDSVARGKLATATSLPEDTVRVFSNRRARRRQEKLEKEMQLPGASQGL  
TVPRVAPGIIISAQQSPGSVPTAALPALEPLGPSCYQLCATAPERCLSDTPPKACLKPCDC  
GSFLLPVIAPSCVDVAPCLDASLAHHLIGGAGKATPTHFHP

>O43543

MCSAFHRAESGTELLARLEGRSSLKEIEPNLFAEEDSPVHGDILEFHGPEGTGKTEMLYH  
LTARCILPKSEGGLEVEVLFIDTDYHFDMLRLVTILEHRLSQSSEEI IKYCLGRFFLVYC  
SSSTHLLLTLYSLESMFCSHPSLCLLILDSLSAFYIDRVNGGESVNLQESTLRKCSQCLE

KLVDYRLVLFATTQTIMQKASSSSEEPHASRRLCDVDIDYRPYLCKAQQLVKHRMFFS  
KQDDSQSSNQFSLVSRCLKSNSLKKHFFIIGESGVEFC

>O43680

MSTGSLSDVEDLQEVEMLECDGLKMDSNKEFVTSNESTEESSNCENGSPQKGRGGLGKRR  
KAPTKKSPLSGVSQEGKQVQRNAANARERARMRVLKAFSRLKTTLPVPPDTKLSKLDLTL  
RLASSYIAHLRQILANDKYENGYIHPVNLTPFMVAGKPESDLKEVVVTASRLCGTTAS

>O43683

MDTPENVLQMLEAHMQSYKGNLPLGEEERYIQVEENFPENKEYLITLLEHLMKEFLDKKKY  
HNDPRFISYCLKFAEYNSDLHQFFEFLYNHGIGTLSSPLYIAAGHLEAQGELQHASAVLQ  
RGIQNQAEPREFLQQYRFLQTRLTETHLPAQARTSEPLHNVQVLNQMITSKSNPGNMA  
CISKNGGSELSGVISSACDKESNMERRVITISKSEYSVHSSLASKVDVEQVVMYCKEKLI  
RGESEFSFEELRAQKYNQRRKHEQVNEDRHYMKRKEANAFEEQLLKQKMDLHKKLHQVV  
ETSHEDLPASQERSEVNPARGPSVGSQQELRAPCLPVTYQQTPVNMEKNPREAPPVVP  
LANAISAAVSPATSQSIAPPVPLKAQTVTDSMFAVASKDAGCVNKSTHEFKPQSGAEIK  
EGCETHKVANTSSFHTTNPNTSLGMVQATPSKVQPSPTVHTKEALGFIMNMFQAPTLPLDIS  
DDKDEQSLDQNEFAEAQFQKNVRSSGAGVNKIISLSSAFHVFEDGNKENYGLPQPKNK  
PTGARTFGERSVSRPLPSKPKEEVPHAEFFLDDSTVGIKCNKTLAPSPKSPGDFTSAAQLA  
STPFHKLKLVESVHILEDKENVVAKQCTQATLDSCEENMVVPSRDGKFSPIQEKSPKQALS  
SHMYSASLLRLSQPAAGGVLTCEAELGVEACRLTDTDAIAEDPPDAIAGLQAEMQMSSL  
GTVDAPNFIVGNPDDKLIFKLLSGLSKPVSSYPNTFEQCKLPAIKPKTEFQLGSKLVYVH  
HLLGEGAFQVYEATQGDLDNAKQKQFVLKVQKAPANPEFYIGTQLMERLKPMSQHMFMK  
FYSAHLFQNGSVLVGELYSGTLLNAINLYKNTPEKVMPQGLVIFSAMRMLYMIEQVHDC  
EIIHGDIKPDNFI LGNGFLEQDDEDDL SAGLALIDLQSIDMKLFPKGTIFTAKCETSGF  
QCVEMLSNKNPYQIDYFGVAATVYCMFLFGTYMKVKNEGGECKPEGLFRRLPHLDMNEFFH  
VMLNIPDCHHLPSLDLLRQKLKVFQOHYTNKIRALRNRLIVLLECKRSRK

>O43829

MEFFISMSETIKYNDHKTFLKTLNEQRLEGEFCDAIIVVEDVKFRAHRCVLAACSTY  
FKKLFKKLEVDSSSVIEIDFLRSDIFEEVLNMYTAKISVKKEDVNLMMSSGQILGIRFL  
DKLCSQKRDVSSPDENNGQSKSKYCLKINRPIGDAADTQDDVVEEIGDQDDSPSDDTVEG  
TPPSQEDGKSPTTTLRVQEAAILKELGSEEVKVNKYGQEVESMETPESKDLGSQTPQALT  
FNDGMSEVKDEQTPGTAAASDMKFEYLLYGHHRQIACQACGKTFSDRGRKHEKLHTA  
DRPFVCEMCTKGFTTQHLKEHLKIHTGYKPYSCVCGKSFIRAPDLKKHERVHSNERPF  
ACHMCDKAFKHKSHLKDHERHRGKPFVCGSCTKAFKASDLKRHENNMHSERKQVTPS  
AIQSETEQLQAAAMAAEAEQQLETIACS

>O60231

MATPAGLERVQDELHSLVGLSERHVAQFLIGTAQRCTSAEEFVQRLRDTDLTDLGSPARD  
FALRLNKVPRKAVVEKPARAAEREARALLEKNRSYRLLEDSEESSEETVSRAGSSLQKKR  
KKRKHRLKREEEEEEEASEKGGKKTGGSKQQTEKPESEDEERTERERLQDLEERDAFAE  
RVRQRDKDRTRNVLERSDKKAYEEAQKRLKMAEEDRKAMVPELRKKSREYLAKREREKL  
EDLEAELADEEFLFGDVELSRHERQELKYKRRVRDLAREYRAAGEQEKLEATNRYHMPKE  
TRGQPARAVDLVEEESGAPGEEQRREEARLGAASLKFGARDAASQEPKYQLVLEEEETIE  
FVRATQLQGDEEPSAPPTSTQAQQKESIQAARRSLPVFPFREELLAAIANHQVLIIEGET  
GSGKTTQIPQYLFEEGYTNKGMKIACTQPRRVAAMSVAARVAREMGVKGNEVGYSIRFE  
DCTSERTVLRYMTDGMLLREFLSEPDLASYSVVMVDEAHERTLHTDILFGLIKDVARFRP

ELKVLVASATMDTARFSTFFDDAPVFRI PGRRFVDFI FYTKAPEADYLEACVVSVLQIHV  
TQPPGDILVFLTGQEEIEAACEMLQDRCRRLGSKIRELLVLP IYANLP SDMQARIFQPTP  
PGARKVVVATNIAETSLTIEGIIYVLDPGFCKQKSYNPR TGMESLTVTPCSKASANQRAG  
RAGRVAAGKCFRLYTAAYQHELEETTVP EIQRTSLGNV VLLLKSLGIHDLMHDFLDPPP  
YETLLLAL EQLYALGALNHLGELTTSGRKMAELPVD PMLS KMILASEKYS CSEEILTVA A  
MLSVNNSIFYR PKDKVVHADNARVNF FLPGGDHLV LLNVYTQAESGYSSQCYENFVQFRS  
MRRARDVREQLEGLLERVEVGLSSCQGDYIRVRKAITAGYFYHTARLTRSGYRTVKQQQT  
VFIHPNSSLFEQQPRLLYHELVLTTKEFMRQVLEIESSLLEVAPHYYKAKELED PHAKKM  
PKKIGKTREELG

>P0CG13

MVQIVISSARAGGLAEVLMELQGEIEARYSTGLAGNLLGDLHYTTEGIPVLIVGHHILYG  
KIIHLEKPFVAVLVKHTPGDQDCDELGRETGTRYLV TALI KDKILFKTRPKPIITSVPKKV

>P39687

MEMGRRIHLELRNRTPSDVKELVLDNSRSNEGKLEGLTDEFEELEFLSTINVGLTSIANL  
PKLNKLLKLELSDNRVSGGLEVLAEKCPNLTHLNL SGNKIKDLSTIEPLKKLENLKSLLD  
FNCEVTNLNDYRENVFKLLPQLTYLDGYDRDDKEAPDS DAEGYVEGLDDEEEDDEEEDYD  
EDAQVVEDEEEDDEEEDGEEEDVSGEEEDDEEGYNDGEVDDEEEDDEEELGEEERGQKRKRE  
PEDEGEDDD

>P52655

MANSANTNTVPKLYRSVIEDVINDVRDIFLDDGVDEQVLMELKTLENKLMQSRVDFGHS  
EEQQLLLQVQQQHQPQQQHHHHHHHQAQPQQTVPQQAQTQQVLI PASQQATAPQVIVP  
DSKLIQHMNASNMSAAATAATLALPAGVTPVQQILTNSGQLLQVVRAANGAQYIFQPQQS  
VVLQQQVIPQMPPGGVQAPVIQQVLA PLPGGISPQTGVI IQPQQILFTGNKTQVIPTTVA  
APTPAQAITATGQQQPQAQPAQTQAPLVLQVDGTGDTSS EDEDEEEDYDDDEEEDKEK  
DGAEDGQVEEPLNSEDDVSDDEEGQELFDTENVVVCQYDKIHRSKNKKFHLKDGIMNLNG  
RDYIFSKAIGDAE

>P52945

MNGEEQYYAATQLYKDPCAFQ RGPAP EFSASPPACL YMGRQPPPPPHFPFGALGALEQG  
SPPDISPYEVPLADDPVAHLHHHLPAQLALPHPPAGPFPEGAEPGVLEEPNRVQLPFP  
MKSTKAHAKGQAGGAYAAEPEENKRTRTAYTRAQLLELEKEFLFNKYISRPRRVELAVML  
NLTERHIKIFQNRMMKKKEEDKRRGGTAVGGGGVAEPEQCAVTSGEELLALPPPPPPG  
GAVPPAAPVAAREGRLPPGLSASPQPSSVAPRRPQEPR

>P53350

MSAAVTAGKLARAPADPGKAGVPGVAAPGAPAAAPPAKEIPEVLVDPRSRRRYVRGRFLG  
KGGFAKCFEISDADTKEVFAGKIVPKSLLLKPHQREKMSMEISIHRS LAHQHVVGFGHGF  
EDNDFV FVVLELCRRRSLELHKRRKALTEPEARYYLRQIVLGCQYLHRNRVIHRDLKLG  
NLFLNEDLEVKIGDFGLATKVEYDGERKKTLCGTPNYIAPEVLSKKGHSFEVDV SIGCIM  
YTLLVGKPPFETSCLKETYLRIKNEYSIPKHINPVAASLIQKMLQTDPTARPTINELLN  
DEFFTSGYIPARLPITCLTIPPRFSIAPSSLDPSNRKPLTVLNKLENPLPERPREKEEP  
VVRETGEVVDCHLS DMLQQLHSVNASKP SERGLVRQEEAEDPACIPIFVSKVDYS DKYGL  
GYQLCDNSVGVLFNDSTRILLYNDGDSLQYIERDGTESYLTVSSHPNSLMKKITLLKYFR  
NYMSEHLLKAGANITPREGDELARLPYLRTFRTRSAIILHLSNGSVQINFFQDHTKLI LC  
PLMAAVTYIDEKRDFR TYRLS LLEEYGCCKELASRLRYARTMVDKLLSSRSASNRLKAS

>P54725

MAVTITLKTLOQQTFKIRMEPDETVKVLKEKIEAEKGRDAFPVAGQKLIYAGKILSDDVP  
IRDYRIDEKNFVVMVTKTKAGQGTSAPPEASPTAAPESSTSFPPAPTSGMSSHPPPAARE  
DKSPSEESAPTTSPESVSGSVSSGSSGREEDAASLTGSEYETMLTEIMSMGYERERV  
VAALRASYNPNPHRAVEYLLTGIPGSPEPEHGSVQESQVSEQPATEAAGENPLEFLRDQPQ  
FQNMQRQVIQQNPALLPALLQQLGQENPQLLQQISRHQEQFIQMLNEPPGELADISDVEGE  
VGAIGEEAPQMNYIQVTPQEKEAIERLKLALGFPESLVIQAYFACEKNENLAANFLLSQNF  
DDE

>P55769

MTEADVNPKAYPLADAHLTKKLLDLVQQSCNYKQLRKGANEATKTLNRGISEFIVMAADA  
EPLIILHLPLLCDKNVPYVFRSKQALGRACGVSRPVIACSVTIKEGSQKQIQSIQ  
QSIERLLV

>Q4JDL3

MSSPRDFRAEPVNDYEGNDSEAEDLNFRETLPSSSQENTPRSKVFENKVNSEKVKLSLRN  
FPHNDYEDVFEEPSSESGSDPSMTARGPFRDRSSEDEEAAGPSQALSPLLSDRKIVSEG  
ELDQLAQIRPLIFNFHEQTAIKDCLKILEEKTAAYDIMQEFMALELKNLPGFNQPS  
NREKNRYRDILPYDSTRVPLGKSKDYINASYIRIVNCGEEYFYIATQGPELLSTIDDFQMV  
LENNSNVIAMITREIEGGI IKCYHYPI SLKKPLELKHFRVFLYNYQILQYFIIRMFQVVE  
KSTGTSHSVKQLQFTKPDHGTPASADSFICYIRYARKSHLTGPMVVHCSAGIGRTGVFLC  
VDVVFCAIVKNCSFNIMDIVAQMREQRSQGMVQTKQYHFCYDIVLEVLRLKLLTLD

>Q7Z7K6

MRRSRSSAAAKLRGQKRSGASGASAAPAASAAAALAPSATRTRRSASQAGSKSQAVEKPP  
SEKPRLRRSSPRAQEEGPGEPPELALLPPPPPPPTPATPTSSASNLDLGEQRERETF  
QKRQKLTSEGAAKLLLDTFEYQGLVKHTGGCHCGAVRFEVASADLHIFDCNCSICKKKQN  
RHFIVPASRFKLLKGAEHITTYTFNTHKAQHTFCKRCGVQSFYTPRSNPGGFGIAPHCLD  
EGTVRSMVTTEEFNGSDEKAMKEHKTIKNMSKE

>Q9UI95

MTTLTRQDLNFGQVADVLCFLEVAVHLILYVREVYPVGIQKRKYNVPVQMSCHPEL  
NQYIQDTLHCVKPLLEKNDVEKVVVILDKEHRPVEKVFVEITQPPLLSISSDSLSSHVE  
QLLRAFILKISVCDAVLDHNPFGCTFTVLVHTREAATRMEKIQVIKDFPILADEQDVHM  
HDPERLIPKTMTSIDILKMQLYVEERAHKGS

>Q9UMS4

MSLICISINEVPEHPCVSPVSNHVYERRLIEKYIAENGTDPINNQPLSEEQLIDIKVAHP  
IRPKPPSATSIPAILKALQDEDAVMLHSFTLRQQLQTTTRQELSHALYQHDAACRVIARLT  
KEVTAAREALATLKPQAGLIVPQAVPSSQPSVVGAGEPMDLGELVGMTPEIIQKLQDKAT  
VLTTERKKRGKTVPEELVKPEELSKYRQVASHVGLHSASIPGILALDLCPSDTNKILTGG  
ADKNVVVFDKSSEQILATLKGHTKKVTSVVFHPSQDLVFSASP DATIRISVFNASCVQVV  
RAHESAVTGLSLHATGDYLLSSDDQYAFSDIQTGRVLTKVTDETSGCSLTCAQFHPDGL  
IFGTGTMSQIKIDLKERTNVANFPGHSGPITSIAFSENGYLLATAADDSSVKLDRKLLK  
NFKTLQLDNNFEVKS LIFDQSGTYLALGGTDVQIYICKQTEILHFTEHSGLTTGVAFGHH  
AKFIASSTGMDRSLKFYSL

### (9) 30 peroxisomal proteins

>A5PJL1

MVAPPQLRALLFAINALLSKRRYHAALAMLKGFNRGAVYGAKIRAPHALVMTFLFRSGSL  
REKLRAILQATYTHSNLARFVFLYKGLCALQSHVQGKTYQAHSFVSAFIGLLVFGNNNN



INSQISMYLLSRVLFALCRLGVEKGFIPPEPRLDPPFSGLVGLVLLFEYHRPTLQPSLQS  
SMTYLYEDSNVHDLSDFFIYNKSQPSK

>A6H7C2

MFRSTNFLKRHHKCI FLGTVLGGVYILGKYGQKKIREIQERAAEYIAQARRQYHFESN  
QRTCNMTVLSMLPTLREALMQQLNSESLTALLKTRPSNKLEIEDLKIISFTRSIVAVYST  
CMLVLLRRVQLNIIGGYIYLDNAAVGKNGTTVLAPPDVQQQYLSSIQHLLGDGLTELI TV  
IKQAVQKILGVSLSLKHSLSLLDLEQKLKEIRDLVEQHKSSSINNDGSKSLLCHYMPDEE  
TPLAVQACGLSPRDVTTIKLLNETRDMLSPDFSTVLNTCLSRGFSRLLDNMAEFFRPT  
QDLQHGNINSLSVSLPLAKIIPILINGQIHSVCSETPSHFVQDLLMMEQVKDFAANVYE  
AFSTPQQLEK

>B3DMA2

MEMDVTRDTVEVLPQHKFDIRSLEAYLNQHLPFGSDHRAVLTVTQYRSGQSNPTFFLQK  
GSQAYVLRKKPPGSLLPKAKHIDREFKVQKALFSVGFPVVKPLLYCSNASIIGTEFYVME  
HVQGRIFRDFSIPGVSPAERAAIYVSLVETLALHSLDIHSLGLDRYGTGVGYCKRQVSTT  
KQYQASAHQSI PAMDQLSTLMRNLPDSDNEECLVHGDFKLDNIVFHPKECRVIAVLDELS  
TFGHPLSDLAHLSLFYFPRTLPMINRGSHIQENTGIPLMEELISIIYCRRRGIDPNLPNF  
FMALSFFKLAGIAQGVYSRYLMGNNSSEDSFLTANTVQPLAETGLQLSRRTLSTVPPQAD  
AKSRLFAQSRRGQEVLRVKQFMKQHVFPAAEKEVAEYQAQNGNSAEKEHPLVIEKLEKEMA  
KAEGNLNLFPAVSGLSQVDYALIAEETGKCFAPDVFNCQAPDTGNMEVLHLYGSEQQKQ  
QLEPLLRGDITSVFCMTEPNVSSSDATNMECSIQRDGGSYIVHGKKSAGNPKCKIAVV  
LGRTEPSVSRHKVHSMILVPMDTPGVELIRPLSVFGYMDNVHGGHEVHFHNRVVPASN  
ILGEGRGFEISQGRLGPGRIHHCMRVGLAERILQIMCDRAVQREAFGKKLYEHEVVAHI  
AKSRIAIEEIRLLTLKAAHSIDTLGSAARKEIAMIKVAAPKAVCKIADRAIQVHGGAGV  
SQDYPLANMYAIRTLRLADGPDEVHLSAIKMELODQARQLKARM

>O00116

MAEAAAAGGTGLGAGASYGSAADRDRDPDRAGRRLRVLSGHLLGRPREALSTNECKA  
RRAASAATAAPTATPAAQESGTIPKKRQEVKNGGYNDSKFI FNKKGQIELTGKRYPLSG  
MGLPTFKEIQNTLGVNVEHKTTSKASLNPSDTPPSVVNEDFLHDLKETNISYSQEADDRV  
FRAHGHCLHEIFLLREGMFERIPDIVLPTCHDDVVKIVNLACKYNLCIIPIGGGTSVSYG  
LMCPADETRTIISLDTSQMNRILVDENNLTAHVEAGITGQELERQLKESGYCTGHEPDSL  
EFSTVGGVSTRASGMKKNIIYGNIEDLVVHIKMVTPRGIIEKSCQGPRMSTGPDIIHFFIMG  
SEGLGVITEATIKIRPVPEYQKYGSVAFPNFEQGVACLREIAKQRCAPASIRLMDNKQF  
QFGHALKPQVSSIFTSFLDGLKKFYITKFKGFDPNQLSVATLLFEGDREKVLQHEKQVYD  
IAAKFGGLAAGEDNGQRYLLTYVIAYIRDLALEYYVLGESFETSAPDRVVDLCRNVKER  
ITRECKEKGQVQFAPFSTCRVTQTYDAGACIYFYFAFNRYRGISDPLTVFEQTEAAAREEIL  
ANGGSLSHHHGVGKLRKQLKESISDVGFGLKSVKEYVDPNNIFGNRNLL

>O14136

METNQNEKGPSPSY PAGGIMSVSNADTNQGVTOHPLANRIVNPNYYNMGFNPYSGFN  
SFI PSFNPFVPLETNLPNGPISSLQVIESIVGAVGSIAQVLESTLMAAHMSYNTFVSVS  
ENLNKLSIGAI FGI VSLSRKRLVLFKFKHSKIDEMNSQEYDVFEKEEGNHKNSIYS  
IVSSLAIILGLVGLPYAIRLRFKNIYEKEKQIQQAKIRKKIDSLEFCKADYEFMSRDPGV  
EMSLKKGDI IAILSKTDTQGNPCEQGRKRSGETGFPSNYCSIISR

>O14832

MEQLRAAARLQIVLGHGRPSAGAVVAHPTSGTISSASFHPQQFQYTLDNNVLTLEQRKF

YEENGFLVIKNLVDPADIQRFRNEFEKICRKEVKPLGLTVMRDVTISKSEYAPSEKMITK  
VQDFQEDKELFRYCTLPEILKYVECFCTGPNIMAMHTMLINKPPDSGKKT SRHPLHQDLHY  
FPFRPSDLIVCATAMEHISRNNGLVVLPGTHKGLKPHDYPKEGGVNKMFHGIQDYEEN  
KARVHLVMEKGDTVFFHPLLIHGSGQNKTOGFRKAISCHFASADCHYIDVKGTSQENIEK  
EVVGIAHKFFGAENSVNLKDIMFRARLVKGERTNL

>O18778

MDRNRASARLTVLLRHLGCRSAGTIIAHHTSGVGLASFHPQQFQYTRENNVLSLEQRKF  
YEENGFLVIKNLVSDADIQRFRNEFERICRKEVKPLGLSVMRDVTITKSEYVPSEKVVSK  
VQDFQEDEELFRYCTLPEILKYVECFCTGPNIMAMHTMLINKPPDSGKKT SRHPLHQDLHY  
FPFRPSNSIVCATAMEHIDRNNGCLVVLPGTHKGPLQPHDYPQEGGVNIMFHGIQDYDKN  
NARVHLVMEKGDTVFFHPLLIHGSGRNKSQOFRKAISCHFADANCHYIDVEGTSQENIEK  
EVDIVRKKYGFKDVTCLKDVTFRGRVVKGERINL

>O35078

MRVAVIGAGVIGLSTALCIHERYHPAQPLHMKIYADRFTPFTTSDVAAGLQPYLSDPSNP  
QEAENQQTDFDHLQSLHSPNAEKMGALISGYNLFRDEVPDPFKSTVLGFRKLTPELDM  
FPDYSYGFNTSLLLEGKSYLSLTERLTERGVKFIHRKVASFEEVVRGGVDVIINCTGVAG  
ALQADASLQPRGQIIQVEAPIKHFILTHDPSLGIYNSPYIIPGSKTVTLGGVFQLGNSE  
LNSVHDHNTIKSCCQLEPTLKNARIMGELTGFRPVRPQVRLERERLRFSSSAEVIHNYG  
HGGYGLTIHGCAMEAANLFGKILEEKNL SRMPPSHL

>O35386

MNLTRAGARLQVLLGHLGRPSAPTIVAQPVSGLASPASFQPEQFQYTLDNNVLTLEQRKF  
YEENGFLVIKNLVSDDDIQRFRAEFERICREEVKPPGIVIMRDVALAKQDYMPSDRMVSK  
IQDFQEDEELFRYCLLPEILKYVECFCTGPNIMALHGMLINKPPDVGKKT SRHPLHQDLHY  
FPFRPSNLIVCATAMEHIDRNNGCLVVLPGTHKGLKPHDYPKEGGVNKMYHGIQDYDPN  
SPRVHLVMEKGDTVFFHPLLIHGSGRNKTQOFRKAISCHFGSSDCQCIDVSGTSQENIAR  
EVVEMAEEKYGFQGVMDFKDTIFRSRLVKGERINI

>O49506

MEITNVMEYEKIAKEKLPKMVYDYYASGAEDQTLQENRNAFSRILFRPRILIDVSKIDVS  
TTVLGFNISMPIMIAPTAMQMAHPDGELATARATSAAGTIMTLSSATCSVEEVASTGPG  
IRFFQLYVYKDRNVVIQLVKRAEEAGFKAIALTVDTPRLGRRES DIKNRFALPRGLTLKN  
FEGLDLGTKIDKTND SGLASYVAGQVDQSLSKDIKLSITSLPILVKGVITAEDARIAVEY  
GAAGIIVSNHGARQLDYVPATIVALEEVVKAVERIPVFLDGGVRRGTDVFKALALGASG  
VFVGRPSLFSLAADGEAGVRKMLQMLRDEFELTMALSGCRSLREISRTHIKTDDTPHYLS  
AKL

>O59807

MIRAHLFSEPDNSKLAKSTGSDAFDLILKVLLTAPYYCLTTLFFTLIIILYPRPTLACSV  
ALFFTSLDTLEPDDRKNTLKASEAVSTS AKTSEETAKPSETREDGENTLKNLEADAQNL  
MSGFQMLQRRSQPKTTTLKTEVKEQQASQSPSVEGENEPAGVKSNEATKPSVTEEKEKNA  
EQNKRRERLSISHIVTELAKKDEVSSSESGSNEIVNAKLNKNEQLDSNFTLLDAYLEPLVHL  
HEYSRRSNTLFFFYLPVMSILIFCLPTQALFIVLSSVFLAHS PPLQAVLFCIRRISFFN  
LLYEK FVIGKTK EPAKPVQPSSNEPPAPSAENKQPSVSSPEKKESPATHLLKVI GSSPY  
VVHSNHTNNTLTDKESSDPTEKCLYLIEHQRYVGVGLNRTLPTDPPNFTNAGSTDPVAEP  
TAQLLPDGLAIDDKSISPTFTDTFAQPAKTQFRTAFTRSRERRRYRVAPPAENEKPHTS  
RTNTASSLSSTSEDQVSTHGSISSAKVTAIPDSNGAEAL

>O60065

MREDLLRNSVEFLREKTVLDAPDVKKIEFLKSKGLTAEI IQEAFKLAKNPLFPSYPRFEN  
TSNFVSRDRDFIMGVISTGFASAYSLVKKYIAPMFRAPSQNAYEADKNALDAKFLEAHKI  
LENLDEQTRKLSERTEKQQDELDIALDDLEETLNTLKRTSENDRDREIARISQDVYTMSTI  
TLPQSLEQIKKSQEEALQNLRSREISSLRCLQTD SKKDDTFATTSNSSIPVLENPLDTSEG  
FQTKKVG TASLPDQISMHNEASKNIDFNIDIPAESYVAEDAY

>O70597

MDAFIRVANQSQGRDRLFRATQHACMLLRYLLESKAGKEAVVTKLKNLETSVSTGRKFRL  
GNVLHAIQATEQSIQATDLVPRCLTLANLNRVYYICDTVLAKSVGLTSGINREKQMR  
ARHYYYFLLLSLVRDLYEVLLHMGQVARDRAKREKSSGDPKYSVANEESELQSFLLLLF  
QSLKRNPPFLD TVKNFCDILIPLNQLGIYKSNLGVVGFGLVSSVAGLITVVYPQLKLR  
AR

>O74934

MTTNTFTDPPVEMAKERGKTQFTVRDVTNFLNGGEEETQIVEKIMSSIERDPVLSVTADY  
DCNLQQARKQTMERVAALSPYLVTDTEKLSLRAQLHGMVDMSTRRLSIHNNLFIGSIRG  
SGTPEQFKYVKKGAVAVKQFYGCFAMTELGHGSNLKGLETTATYDQDSDQFIINTPHIGA  
TKIGGAAHTSTHCVCFAKLIVHGKDYGTRNFVPLRNVHDHSLKVGVSIGDIGKKMGRDG  
VDNGIQFTNVRI PRQNMLMRYAKVSDTG VVTKPALDQLTYGALIRGRVSMIADSFHVSKR  
FLTIALRYACVRRQFGTSGDTKETKI IDYPYHQRRLLPLLAYCYAMKMGADAEQKT IETT  
DRILALNPNDPAQKNDLEKAVTDTKELFAASAGMKAFTTGCAKI IDECRQACGGHGYSGY  
NGFGQYADV VQCTEGDNNVLC LSMGRGLVQSALQILAGKHVGASIQYVGDKSKISQNGQ  
GTPREQLLSPEFLVEAFRTASRNNILRTTDKYQELVKTLPDQAFEELSQQRFQCARIHT  
RQHLISSFYARIATAKDDIKPHLLKLANLFALSIEEDTGIFLRENILTPGDIDLINSLVD  
ELCVAVRDQVIGLTD AFGLSDFFINAPIGSYDGNVYEKYFAKVNQQNPATNPRPPYYEST  
LKPFLFREEEDDEICDLDE

>O74936

MISPNTANVEIDGKQYNTFTEPPKALAGERAKVKFPIKDMTEFLHGGEENVTMIERLMT  
ELERDPVLNVSGDYDMPKEQLRETAVARIAALSGHKKDTEKEALLRSQLHGIVDMGTRIR  
LGVHTGLFMGAIRGSGTKEQYDYVRKGAADVKG FYGCFAMTELGHGSNVAGLETTATYIQ  
DTDEFIINTPNTGATKIGGAAHSATHACFARLLVDGKDYGVKIFVVQLRDVSSHSLMPG  
IALGDIGKKMGRDAIDNGIQFTNVRI PRQNMLMRYAKVSSSTGKVSQPPLAQLTYGALIGG  
RVTMIADSFVVSQRFITIALRYACVRRQFGTTPGQPETKI IDYPYHQRRLLPLLAFTYAM  
KMAADQSQIQYDQTTDLLQTIDPKDKGALGKAIVDLKELFASSAGLKAFTTTCANI IDQC  
RQACGGHGYSGYNGFGQAYADV VQCTEGDNNVLC LSMGRGLIQSCLGHRKKGKPLGSSVGY  
LANGGLEQATLSGRDLKDPKVLIEAEKVANGAIQRATDKFVELTKGGLSPDQAFEELSQQ  
RFQCAKIHTRKHLVTA FYERINASAKADV KPYLINLANLFTLSIEEDSGLFLREGFLQPK  
DIDQVTELNVNHYCKEVRDQVAGYTD AFGLSDFFINAPIGNVDGDVYKHYFAKVNQQNPAQN  
PRPPYYESTLRPFLFREDEDDDICELDEE

>O75192

MDAFTRFTNQTQGRDRLFRATQYTCMLLRYLLEPKAGKEKVMKLLKLESSVSTGRKFRL  
GNVVHAIQATEQSIHATDLVPRCLTLANLNRVIYFICDTILVRSVGLTSGINKEKRTRA  
AHYYYSLLLSLVRDLYEISLQMKRVTCDRAKKEKSASQDPLFSVAEEETELQSFLLLLF  
RSLKQHPPLLLD TVKNLCDILNPLDQLGIYKSNPGI IGLGGLVSSIAGMITVAYPQMKLR  
TR

>O80845

MGTTLDVSRaelalVVMYLNKAeARDKLCRAIQYgSKFLSGGQPGTAQNVDKSTSLARKV  
FRLFKFVNDLHGLISPVPKGTPLPLVLLGKSKNALLSTFLFLDQIVLGRSGIYKNKERAE  
LLGRISLFCMGSSVCTTLVEVGEMGRLLSSSMKKIEKGLKNGNKYQDEDYRAKLKKSNER  
LALIKSAMDIVVAAGLLQLAPTKITPRVTGAFGFITSIIISCYQLLPTRPKIKTP

>O89016

MAVPGPTARAGARPRDLQLVQRFVRIQKVFFPSSSQNVLMMLMTLLCVTLLEQLVIYQVG  
LIPSQYYGVLGNKDLDFKALTLLAVTLIVLNSTLKSFDQFTCNLLYVSRKDLTEHLHLL  
YFRARVYYTLNVLRDDIDNPDQRISQDVERFCRQLSSVTSKLIISPFTLTYYTYQCFQST  
GLGPVSIFGYFIVGTMVNKTLMGPIVTKLVQQEKLEGDFRFKHMQIRVNAEPAAFYRAGL  
VEHMRTDRRLQRLQTRQLRELSRELLYIGINTFDYLGSIISYVVIPIPIFSGVYGDLSPT  
ELSTLVSKNAFVCIYLI SCFTQLIDLSTTSLSDVAGYTHRIGELQEALLDMSRKSQDCEAL  
GESEDLDKTPGCPTTEPSDTAFLDRVSI LAPSSDKPLIKDLSLKICEGQSLITGNTGT  
GKTSLLRVLGGLEGMKGSVQMLADFGPHGVFLFPQKPFFTDGTREQVIYPLKEIYPDSG  
SADDERIVRFLELAGLSSLVARTGGLDQVDNYDVLSPGEMQRLSFARLFYLQPKYAVLD  
EATSALTEEAESELYRIGQQLGMTFISVGHRSLEKFHSLVLRLLHGGGSELTRIKLE

>O94227

MTGNRSLVQRHRKKFVSSVLFATLFCATVYFSKRLYKQHLKMTEQRFVKEQIKRRF  
VQTQQDSLYTLYELMPVMTLVLAKDFDLDSIVEALKGKKLQKKLSKGEIAGNELENEGLS  
SGMSAMTPAPSVSAKSPQSADTTSVSETSTKSKAELDDLKKAITKIIISLYTTSLLMMLL  
TRLQNLILARREYLDTAINSAMEKEREKKANQYSVLSFSSITEKSNNLPSEKADPRNSDG  
TIDTDTRSIASTANPEKSRYVNEQAFLSLSLLNRGYLQYKSIIEQLVKEEFQNSNPRDIM  
TMDEFSGKISKIFVTTNKQFFQQPQSNEMFISCLLPEPNLERFVLQQTLEQDALKVLYED  
NLLLKQLVQETNKCLQSPGTIVLESIDETFHTIMEQIEDNVNSKSKPKSNDDDTKVVDI  
SKNSYQIALFSIATKDC TNEMLKAGLVSMNNKFLQKLHSISALDDL SACVYSNFGI

>O94516

MKPLAYYEDQLLKDEKSFLKVTEIERLLSYAAYLLPAEFRDDQLKSQTITSI LLLLHQFH  
TGLLFRKIAELPKTEQAILKERTQYLEYFRKKNPSFEKVSELLYFLNISTFPIELVISK  
YNPSRQFLLRVHIMTTGGDLPLSNPVLQRDFNVKTFIHLHKKYSNSGSAVVLKNSKKVVP  
RLNTVNSSLDFLQNRTPRLSSILPDEIFTKRLPNLRIFSNFIKVCRLIYMLFMHKKRQK  
SSSLKVRPGPIVAFVFEVISQLIDRRCESATSSRQGFGLERRTNQSQFQHFVVAFTQGRF  
YDEF TKHINRSLSVNSIPVFGKYLLLSVEERQKSLENYISSETIKEALMTRTYRNPFLIY  
LTRCFSL

>O96011

MDAVRFSAQSQARERLCRAAQYACSLLGHALQRHGASPELQKQIRQLESHLSLGRKLLRL  
GNSADALESAKRAVHLSDVVLRFCITVSHLNRAlyFACDNVLAGKSGLAPRVDQEKAQRS  
FRYFLSLIMNLSRDAYEIRLLMEQESSACSRRLKSGGGVPGGSETGGLGGPGTPGGGL  
PQLALKLRLQVLLLARVLRGHPLLLLDVVRNACDLFIPLDKLGLRCPGIVGLCGLVSSI  
LSILTLYIPLRLKP

>P00371

MRVVVIGAGVIGLSTALCIHERYHsvLQPLDVkVYADRFTPF TTTDVAAGLQPYTSEPSN  
PQEANNQOTFNyLLSHIGSPNAANMGLTPVSGYNLFREAVDPYKDMVLGFRKLTPRELD  
MFPDYRYGFNTSLILEGRKYLQLTERLTERGVKFFLRKVESFEVARGGADV I INCTGVA  
GVLQPDPLLQPGRGQIIKVDAPlKNFIIITHDLERGIYNSPYIIPGLQAVTLGGTFQVGN

EINNIQDHNTIEGCCRLPTLKDIAKIVGEYTGFRPVRPQVRLEREQLRFGSSNTEVIHNY  
GHGGYGLTIHGCALEVAKLFGKVLERNLLTMPPSHL

>P07872

MNPDLRKERASATFNPELITHILDGSPENTRRRREIENLILNDPDFQHEDYNFLTRSORY  
EVAVKKSATMVKKMREYGISDPEEIMFKKLYLANFVEPVGLNYSMFIPTLLNQGTTAQQE  
KMRPSQELQIIIGTYAQTEMGHGTHLRGLETTATYDPKTQEFILNSPTVTSIKPGGLGKTS  
NHAIVLAQLITQGECEYLHAFVVPPIREIGTHKPLPGITVGDIGPKFGYEEMDNGYLKMDN  
YRIPRENMLMKYAQVKPDGTYVKPLSNKLTGTMVFRSFLVGNAAQSLSKACTIAIRYS  
AVRRQSEIKQSEPEPQILDFOQTQQYKLFPLLATAYAFHFVGRYMKETYLRINESIGQGD  
SELPELHALTAGLKAFTTTANAGIEECRMACGGHGYSHSSGI PNIIYVTFPTACTFEGENT  
VMMLQTARFLMKIYDQVRSGLVGGMVSYLNDLPSQRIQPQQVAVPTMVDINSLEGLTEA  
YKLRAARLVEIAAKNLQTHVSHRKSKEVANLTSVDLVRASEAHCHYVVVKVFSKLPKIQ  
DKAVQAVLRNLCLLYSLYGISQKGGDFLEGSIIITGAQLSQVNARILELLTLIRPNAVALV  
DAFDFKDMTLGSLVGRYDGNVYENLFEAKKSPLNKTEVHESYHKHLKPLQSKL

>P09110

MQRLQVVLGHLRGPADSGMPQAAPCLSGAPQASAADV VVVHGRRTAICRAGRGGFKDTP  
DELLSAVMTAVLKDVNLRPEQLGDI CVGNVLQPGAGAIMARIAQFLSDI PETVPLSTVNR  
QCSSGLQAVASIAGGIRNGSYDIGMACGVESMSLADRGNPGNITSRLMEKEKARDCLIPM  
GITSENAERFGISREKQDTFALASQQKAARAQSKGCFQAEIVPVTTTTVHDDKGTKRSIT  
VTQDEGIRPSTTMEGLAKLKPFAFKKDGSTTAGNSSQVSDGAAAILLARRSKAEELGLPIL  
GVLRSYAVVGVPPDIMGIGPAYAIPVALQKAGLTVSDVDIFEINEAFASQAAYCVEKLR  
PPEKVNPLGGAVALGHPLGCTGARQVITLLNELKRRGKRAYGVVSMCIGTGMGAAAVFEY  
PGN

>P09118

MAHYHDDYGKNDEVEFVRTGYGKDMVKVLHIQRDGYHSIKEVATSVQLTLRSKKDYHLG  
DNSDIIPDTIKNTVHVLAKFKGIKSIETFAMNICEHFLSSFHVTRAHVYVEEVPKRFE  
KNGVKHVHAFIHTPTGTHFCDVEQVRNGPPIIHSIGIKDLKVLKTTQSGFEGFIKDQFTTL  
PEVKDRCFATQVYCKRYQNRDVFDEATGAVRDIVLKKFAGPYDRGEYSPSVQKTLYDIQV  
LTLSQLPEIEDMEISLPNIHYFNIDMSKMGLINKEEVLLPLDNPYGKITGTVRRKLPSRL

>P14293

MAPIKRGDRFPTTDDVYIIPPEGGEPGAFELSKFVKTKKFVVSVPGAFTPPCTEQHLPG  
YIKNLPRILSKGVDFVLVITQNDPFVLKGGKELGAADAKKLI FVSDPNLKLTKKLGSTID  
LSSIGLGRSRLALIVNRSGIVEYAAIENGGEDVSTAQKIIAKL

>P16164

MAHYRNDYKKNDEVEFVRTGYGKDMIKVLHIQRDGYHSIKEVATSVQLTLSSKKDYHLG  
DNSDVIPTDTIKNTVNVLAKFKGIKSIETFVAVTICEHFLSSFKHVIRAQVYVEEVPKRFE  
KNGVKHVHAFIYTPGTHFCFVEQIRNGPPIVHSIGIKDLKVLKTTQSGFEGFIKDQFTTL  
PEVKDRCFATQVYCKRYHQGRDVFDEATDTVRSIVLQKFAGPYDKGEYSPSVQKTLYDIQ  
VLTGQVPEIEDMEISLPNIHYLNIDMSKMGLINKEEVLLPLDNPYGRITGTVRRKLTSR  
L

>Q8BGI5

MKSDASTSAAPLKGVLGPLRSSEPALALPAVSPAVHLLLEEASDLLVVHLDFAALET  
CER  
AQSLAEEPVSGTIVEVKCSLCVVGIQALAEEMDRREALSVLRYQVPEKLPKVLLELCILL  
YSKMKEPGAVLDVASALQDPDNQGLPDYGLARLHVFRLLLPSGRLSEAEELAVRSAAFS

EEQRVEALQAIHLARQQHTQEHTQEHSDSQEPQKLRQEGSFSQKLLSLLMLLRRLGVSVS  
HLLSQPFRKGLLAALILCLLILRFDPAPSSLPFLYQLTQLFRRIQKATLSRRLYPLALRD  
>Q9JJK3

MLRSMNFLKRHHKCCI FLGTVLGGVYILGKYGQKKIREIQEREAAYIAQARRQYHFESN  
QRTCNMVLSMLPTLREALMQQLNSESLTALLKNRPSNKLEIEDLKIISFTRSIVAVYST  
CMLVLLRRVQLNIIGGYIYLDNATVGKNGTTVLAPPDVQQYLSLQHLGDGLTELVTV  
IKQAVQRILGSLKHSLSLLDLEQKLKEIRILVEQHRSPSIDKDVSKSSLCQYMPDDEE  
TPLAAQAYGLSPRDITTIKLLNETRDMLESDFSTVLNNTCLNRGFSRLLDNMAEFFRPTE  
QDLQHNSINSLSSVSLPLAKIIPIVNGQIHSVCSDTPSHFVQDLLMMEQVKDFAANVYE  
AFSTPQQLEK

>Q9JJK4

MLRSMNFLKRHHKCCI FLGTVLGGVYILGKYGQKKLREIQEREAAYIAQARRQYHFESN  
QRTCNMVLSMLPTLREALMQQLNSESLTALLKNRPSNKLEIEDLKIISFTRSIVAVYST  
CMLVLLRRVQLNIIGGYIYLDNATVGKNGTSLAPPDVQQYLSLQHLGDGLTELVTV  
IKQAVQRILGSLKHSLSLLDLEQKLKEIRTLVEQHRSCNDKASKSSLCHYMPDDEET  
PLAAQAYGLSPRDITTIKLLNETRDMLESDFSTVLNNTCLNRGFSRLLDNMAEFFRPTEQ  
DLQHNSINSLSSVSLPLAKIIPIVNGQIHSVCSETPSHFVQDLLMMEQVKDFAANVYEA  
FSTPQQLEK

#### (10) 30 plasma membrane proteins

>A0FGR8

MTANRDAALSSHRHPGCAQRPRTPTFASSQRRSAFGFDDGNFPGLGERSHAPGSRLGAR  
RRAKTARGLRGHRQRGAGAGLSRPGSARAPSPRPGGPENPGGVLSVELPGLLAQLARSF  
ALLLPVYALGYLGLSFSVLLALALLACRRSRGLKALRLCRALALLEDEERVVRLGVRACD  
LPVAVHFPDTERAELNKTVKHMPFICQFIEKLFRETIEPAVRGANHTLSTFSFTKVDVGGQ  
PLRINGVKVYTENVDKRQIILDLDLQISFVGNCEIDLEIKRYFCRAGVKSIIHGTMRVILE  
PLIGDMPLVGALSIFFLRKPLLEINTGLTNLLDVPGLNGLSDTIILDIISNYLVLPNRIT  
VPLVSEVQIAQLRFPVPGVLRIFHIEAQDLQKDTYKGLVKGKSDPYGIIRVGNQIFQ  
SRVIKENLSPKNEVYEALVYEHGQELEIELFDEDPDKDDFLGSLMIDLIEVEKERLLDE  
FTLDEVKGLHLRLELTLPNASNLDKVLTDIKADKDQANDGLSSALLIYLDARSARNLP  
SGKKISSNPNPVVQMSVGHKAQESKIRYKTNEPVEENFTFFIHNPKRQDLEVEVRDEQHQ  
CSLGNLKVPLSQLLTSEDMTVSQRFQLSNSGNSTIKMKIALRVLHLEKRERPPDHQHAS  
QVKRPSVSKEGRKTSIKSHMSGSPGPGSNTAPSTPVIIGSDKPGMEEKAQPPEAGPQGL  
HDLGRSSSSLLASPGHISVKEPTPSIASDISLPIATQELRQRLRQLENGTTLGQSPLGQI  
QLTIRHSSQRNKLIVVHACRNLIASFEDGSDPYVRMYLLPDKRRSRRKTHVSKKTLNP  
VFDQSFDFSVSLPEVQRRTLDVAVKNSGGFLSKDKGLLGKVLVALASEELAKGTQYDLTE  
DGTRPQAMT

>A0FGR9

MRAEPCAPGAPSALGAQRTPGPELRLSSQLPELCTFVVRVLFYLGVPVYLAGYLGLSIT  
LLLGALLMRRNRRGKLGRLAAAFELDNREFISRELRGQHLPAIHFPDVERVEANKIIS  
QTPYLSMIMESKFREKLEPKIREKSIHLRTFTFTKLYFGQKCPRVNGVKAHTNTCNRNRV  
TVDLQICYIGDCEISVELQKIQAGVNGIQLQGTLRVILEPLLVDKPFVGAVTVFFLQKPH  
LQINTGLTNLLDAPGINDVSDSLEDLIATHLVLPNRVTVPVKKGLDLTNLRFPLPCGVI  
RVHLLAEQLAQKDNFLGLRGKSDPYAKVSIQLQHFRSRTIYRNLNPTNEVFEMVYEVF  
QDLEVDLYDEDTRDDFLGSLQICLGDVMTNRVDFVFLNDTTSGRHLHLRLELSLLTDQ

EVLTEDHGGLSTAILVVFLESACNLPRNPFDYLNGEYRAKKLSRFARNKVS KDPSSYVKL  
SVGKKTHTSKTCPHNKDPVSQVFSFFVHNVATERLHLKVLDDDQECALGMLEVPLCQILP  
YADLTLEQRFQLDHSGLDSLISMRLVLRFLQVEERELGSPYTGPEALKKGPLLIKKVATN  
QGPKAQPQEEGPTDLPCPPDPASDTKDVSRSSTTTTTSATTVATEPTSQETGPEPKGKDSA  
KRFCEPIGEKKSPATIFLTVPGPHSPGPIKSPRPMKCPASPFAPPKRLAPSMSSLNSLAS  
SCFDLADISLNIIEGGDLRRRQLGEIQLTVRYVCLRRCLSVLINGCRNLTPCTSSGADPYV  
RVYLLPERKACRKKTSVKRKTLEPLFDETFEFFVPMEEVKKRSLDVAVKNSRPLGSHRRK  
ELGKVLIDLSKEDLIKGF SQYELTPNGQPRS

>A4D1S5

MHFSSSARAADENFDYLFKIIILIGDSNVGKTCVVQHFKSGVYTETQQNTIGVDFTVRS LD  
IDGKKVKMQVDTAGQERFRTITQSYRSAHAAIIAYDLTRRSTFESIPHIHEIEKYGAAN  
VVIMLIGNKCDLEKRHVLFEDACTLAEKYGLLAVLETSAKESKNIEEVFVLMAKELIARN  
SLHLYGESALNGLPLDSSPVLMAQQPSEKTHCTC

>A6NJW9

MRPRLLLLAQLTVLHGNSVLQQT PAYIKVQTNKMVMLSCEAKISLSNMCIYLRQRQAPS  
SDSHHEFLTLDSAKGTIHGEEVEQEKI AVFRDASRFILNLTSVKPEDSGIYFCMIVGSPE  
LTFGKGTQLSVVVDLPTTAQPTKKSTLKKRVCRLPRPETQKGPLCSPVTGLLLVAGVLV  
LLVSLGVAMHLCCRARRARLRFMKQLYK

>A6NKC4

MFLTLLLVVVDGQVDTTKAVITLQPPVSVFQEEVTVLHCEVLHLPGSSSTQFLNGTATQ  
TSTPSYRITSASVNDSGEYRCQRGLSGRSDPIQLEIHRGPLLQVSSRVFTEGEPLALRCH  
AKDKLVYNVLYYRNGKAFKFFHNSNLTI LKTNISHNGTYHCSGKGKHHYTSAGISQYTVK  
GLQLPTPVFHVLFYLA VGIMFLVNTVLTIRKELKRKKKNLEISLDSGHEKKVISSLQED  
RHLEELKCKQEQKEEQLOEGVHRKEPQGAT

>A6NLE4

MATQQVDSRRQVA AEQVAAQLLERRRGSHCDDEKQTL LALLILVLYLSTEIGSSEVSERI  
RECNYQNLAVPQGLE YQTNEPSEPIKTI RNLKEKLVHFSEKLEEEVQQLEQLADLELL  
DALLGEPHQEEHCSTYKSHLHLEHEVSIRDH

>A8K4G0

MLPPALLLSLSGCF SIQGPESVRAPEQGS LTVQCHYKQGETYIKCRGVRDTCKIL IETR  
GSEQGEKSDRVS IKDNQKDRFTFTVMEGLRRDDADVCGIERRGPD LGTQVKVIVDPEGA  
ASTTASSPTNSNMAVFIGSHKR NHYMLLVFVKVPILLILVTA ILLKGSQRVPEEPGEQPI  
YMN FSEPLTKDMAT

>A8MPY1

MVLAFQLVSFTYII IILKPNVCAASNIKMTHQRCSSSMKQTCKQETRMKKDDSTKARPQKY  
EQLLHIEDNDFAMRPGFGGSPVPV GIDVHVESIDSISETNMDFTMTFYLRHYKDERLSFP  
STANKSMTFDHRLTRKIVPDI FVHVKRSFIHDTTMENIMLRVHPDGNVLLSLRITVSAM  
CFMDFSRFPLDTQNC SLELESYAYNEDDLMLYKHGNKSLNTEEHMSLSQFFIEDFSASSG  
LAFYSSTGYNRLF INFVLRRHVFFFVLQTYFPAILMVMLSVSFIDRRAVPARVSLGITTV  
LTMSTIITAVSAMPQVS YLKAVDVYLVSSLFVFLSVIEYAAVN YLTTVEERKQFKKTGK  
ISRMYNIDAVQAMAFDGCYHDSEIDMDQTSLSL NSEDFMRRKSICSPSTDSSRIKRRKSL  
GGHVGR IILENNHVIDTYSRILFP IYIILFNLFYGVYV

>O00212

MTAAQAAGEEAPP GVRSVKVVVLVGDGGCGKTSLLMV FADGAFPE SYTPTVFER YMVNLQV

KGKPVHLHIDTAGQDDYDRLRPLFYPDASVLLLCFDVTSFNSFDNIFNRYPEVNHFCCKV  
PIIVVGCKTDLCKDKSLVNKLRRNGLEPVTYHRGQEMARSVGAVAYLECSARLHDNVHAV  
FQEAAEVALSSRGRNFRRITQGFCVVT

>O00451

MILANVFCLFFFLDETLRSLASPSLQGPPELHGRPPVDCVRANELCAAESNCSSRYRTL  
QCLAGRDRNTMLANKECQAALVLEQESPLYDCRCKRGMKKEQCLQIYSIHLGLTEGEEF  
YEASPYEPVTSRLSDIFRLASIFSGTGADPVVSAKSNHCLDAAKACNLNDNCKKLRSSYI  
SICNREISPTERCNRRKCHKALRQFFDRVPSEYTYRMLFCSCQDQACAERRRQTILPSCS  
YEDKEKPNCLDLRGVCRDHLCSRSLADFHANCRAZYQTVTSCPADNYQACLGSYAGMIG  
FDMTPNYVDSSPTGIVVSPSCRGSGNMEEECEKFLRDFTENPCLRNAIQAFNGTQVNV  
SPKGPSFQATQAPRVEKTPSLPDDLSDSTSLGTSVITTTCTSVQEQLKANNKELSMCFT  
ELTTNIIPGSNKVIKPNSSGPRARPSAALTVLSVLMLKLAL

>O00526

MAPLLPIRTLPLILILLALLSPGAADFNISSLSGLLSPALTESLLVALPPCHLTGGNATL  
MVRRANDSKVVTTSSFFVPPCRGRRELVSVDGAGFTVTRLSAYQVTNLVPGTKFYISYL  
VKKGTATESREIPMSTLPRRNMESIGLGMARTGGMVVITVLLSVAMFLLVLGFIIALAL  
GSRK

>O14610

MAQDLSEKDLLKMEVEQLKKEVKNTRIPIISKAGKEIKEYVEAQAGNDPFLKGIPEKDPNF  
KEKGGCLIS

>O14786

MERGLPLLCAVLALVLAAPAGAFRNDKCGDTIKIESPGYLTSPGYPHSYHPSEKCELIQAP  
DPYQRIMINFNPHFDLEDRDCKYDYVEVFDGENENGHFRGKFCGKIAPPPVSSGPFLEFI  
KFVSDYETHGAGFSIRYEIFKRGPECSQNYTTPSGVIKSPGFPEKYPNSLECTYIVFVPK  
MSEIILEFESFDLEPDSNPPGGMFCRYDRLEIDGFPDVGPHIGRYCGQKTPGRIRSSGI  
LSMVFYTDSIAIAKEGFSANYSVLQSSVSEDFKCMEALGMESGEIHSDQITASSQYSTNSA  
ERSRLNYPENGTPEGDSYREIQVDLGLLRVFTAVGTQGAISKETKKKYVVKTYKIDVSSN  
GEDITIKEGNKPVLFQGNTPDVTVVAVFPKPLITRFVRIKPATETGISMRFVEYGCKIT  
DYPCSGMLGMVSGLISDSQITSSNQGDRNMPENIRLVTSRSGALPPAPHSYINELQIDLG  
EEKIVRGI I IQGKHKHRENKVFMRKFKIGYSNNGSDKMIMDDSKRKAKSFEGNNDYDTP  
RTFPALSTRFIRIYPERATHGGLLRMELLGCEVEAPTAGPTTPNGNLVDECDQANCH  
SGTGDDFQLTGGTTVLATEKPTVIDSTIQSEFPTYGFNCEFGGSHKTFCHEHDNHVQLKS  
VLTSKTPGIQDHTGDGNFIYSQADENQKGVARLVSPVVYSQNSAHCMTFYHMSGSHVGT  
LRVKLRYQKPEEYDQLVMAIGHQGDHKEGRVLLHKSLLKLYQVIFEGEIGKGNLGGIAVDD  
ISINNHISQEDCAKPADLDKKNPEIKIDETGSTPGYEGERGEGDKNISRKPGNVLKTLDPI  
LITIIAMSALGVLLGAVCGVVLYCACHNGMSERNLSALENYNFELVDGVKLLKDKLNTQS  
TYSEA

>O14798

MARI PKTLKFVVVIVAVLLPVLAAYSATTARQEEVPQQTVAQQQRHSFKGEECPAGSHRS  
EHTGACNPCTEGVDYTNASNNEPSCFPCTVCKSDQKHKSSCTMTRDTCQCKEGTFRNEN  
SPEMCRKCSRCPSEVQVSNCTSDDIQCVVEFGANATVETPAAEETMNTSPGTPAPAAEE  
TMNTSPGTPAPAAEETMTTSPGTPAPAAEETMTTSPGTPAPAAEETMTTSPGTPASSHYL  
SCTIVGIIVLIVLLIVFV

>O14910



MLKPSVTSAPTADMATLTVVQPLTLDRDVARAIELLEKLQESGEVVPVHKLQSLKKVLQSE  
FCTAIREVYQYMHETITVNGCPEFRARATAKATVAFAAASEGHSHPRVVVELPKTDEGLGF  
NVMGGKEQNSPIIYISRIIPGGVAERHGGKLRGDQLLSVNGVSVGEHHEKAVELLKAAKD  
SVKLVVRYTPKVLEEMEARFEKLRRTARRRQQQQLLIQQQQQQQQQQTQQNHMS

>O15165

MPEAGFQATNAFTECKFTCTSGKCLYLGLSLVCNQQNDGDNDEENCLLVTEHPPPGIFN  
SELEFAQIIIIIVVVVTVMVVVIVCLLNHYKVVSTRSFINRPNQSRREDGLPQEGCLPSDS  
AAPRLGASEIMHAPRSRDRFTAPSFIQRDRFSRFQPTYYPVQHEIDLPTISLSDGEEPP  
PYQGPCTLQLRDPEQQMELNRESVRAPPNRTIFDSDLIDIAMYSGGPCPPSSNSGISAST  
CSSNGRMEGPPPTYSEVMGHHPGASFLHHQRSNAHRGSRLQFQQNNAESTIVPIK GKDRK  
PGNLV

>O43300

MGLHFKPLGAPMLAAIYAMSMVLKMLPALGMACPPKCRCEKLLFYCDSQGFHSVPNATDK  
GSLGLSLRHNHITELERDQFASFSQLTLHLHDHNQISTVKEDAFQGLYKELKELILSSNKIF  
YLPNTTFTQLINLQNLDSLNFQSSLHPELFYGLRKLQTLHLRSNSLRTIPVRLFDRCRSL  
EFLDLSTNRLRSLARNGFAGLIKREHLHLEHNQLTKINFHFLRLSSLHTLFLQNKISNL  
TCGMETGTLEKLDLTGNEIKAI DLTVFETMPNLKILLMDNNKLNLSLDSKILNSLRSLT TV  
GLSGNLECSARICALASLGSFQGREHSILCHSPDHTQGEDILDAVHGFQLCNLSTTVTM  
ATTYRDPPTTEYTKRISSSSYHVGDKIPTTAGIAVTTEEHFPEPDNAIFTQRVITGTMAL  
LFSFFIIIFIVFISRKCCPPTLRRIRQCSMVQNRQLRSQTRLHMSNMSDQGPYNEYEPT  
HEGPFIIINGYGQCKCQQLPYKECEV

>O60235

MYRPARVTSTSRFLNPYVVCFIVVAGVVILAVTIALLVYFLAFDQKSYFYRSSFQLLNVE  
YNSQLNSPATQEYRTLSGRIESLITKTFKESNLRNQFIRAHVAKLRQDGSVGRADVVMKF  
QFTRNNNGASMKSRIESVLRQMLNNSGNLEINPSTEITSLTDQAAANLINECGAGPDLIT  
LSEQRILGGTEAEEGSPQVSLRLNNAHHCGLINMILTAAHCFRSNSNPRDIATSGIS  
TTFPKLRMRVRNILIHNNYKSATHENDIALVRENSVTFTKDIHSVCLPAATQNI PPGST  
AYVTGGAQEYAGHTVPELRQGVRIISNDVCNAPHSYNGAILSGMLCAGVPQGGVDACQG  
DSGGPLVQEDSRRLFIVGIVSGDQCGLPDKPGVYTRVTAYLDIRQQTGI

>O60262

MSATNNIAQARKLVEQLRIEAGIERIKVSKAASDLMSYCEQHARNDPLLVGVPASENPFK  
DKKPCIIIL

>O76036

MSSTLPALLCVGLCLSQRISAAQQQLPKPFIAEPHFMPVPEKQVTICCGNYGAVEYQLH  
FEGSLFAVDRPKPPERINKVKFYIPDMNSRMAGQYSCIYRVGELSEPSNLLDLVVTEMYD  
TPTLSVHPGPEVISGEKVTFCRLDTATSMFLLLKEGRSSHVQRGYGKVQAEFPLGPVTT  
AHRGTYRCFGSYNNHASFPSEPVKLLVTGDIENSLAPEDPTFPADTGTYLTTTETGLQK  
DHALDHTAQNLLRMGLAFLVLVALVFLVEDLSRKRTREERASRASTEGRRRLNTQTL

>O94772

MLPAAMKGLGLALLAVLLCSAPAHGLCQDCTLTNSSHCTPKQCQPSD TVCASVRITDPS  
SSRKDHVSNKMCASSCDFVKRHFSDYLMGFINS GILKVDVDCCEKDLN GAAGAGHSPA  
LAGLLLLSLGPALLAGP

>O94779

MASSKMLFLSVTMCLSEYSKSLPGLSTSYAALLRIKSSSSSLFGSKTRPRYSSPSLGT

LSASSPSLGAAQNYSPINLYHSSDAFKQDESVDYGPVVFVQEPDDIIFFPTDSDEKKVALN  
CEVRGNPVPSYRLRNGTEIDLESYRYSIDGTFFIISNPSEAKDSGHYQCLATNTVGSIL  
SREATLQFAYLGNFSGRTRSASVSVREGQGVVLMCSPPPHSPEIIYSVFNEFPFVAEDSR  
RFISQETGNLYISKVQTSVDGSYICLVKNTVTNARVLSPTPLTLRNDGVMGEYEPKIEV  
HFPFTVTAAGKTTVKMECFALGNPVPTITMKVNGYIPSKARLRKSQAVLEIPNVQLDDAG  
IYECRAENSRGKNSFRGQLQVYTYPHVEKLNDTQLDSGSPLECKATGKPRPTYRLKNGV  
PLSPQSRVEMVNGVLMIHNVNQSDAGMYQCLAENKYGAIYASAELKILASAPTFALNQLK  
KTIIVTKDQEVVIECKPQGS PKPTISKKGDRVRENKRIAILPDGSLRILNASKSDEGKY  
VCRGENVFGSAEIIASLSVKEPTRIELTPKRTELTVGESIVLNCKAIHDASLDVTFYTLK  
GQPIDFEEEGGHFESIRAQASSADLMIRNILLMHAGRYGCRVQTTADSVSDEAELLVRGP  
PGPPGIVIVEEITESTATLSSPAADNHSPISSYNLQARSFSLGQTVKTVPEIITGDMES  
AMAVDLNPVEYEFVAVATNPIGTGDPSTPSRMIRTNEAVPKTAPTNSGRSGRRHELVA  
EPVSEEFQNGEGFGYIVAFRPNNGTRGKEKMTSSEASKFIYRDESVPPLTPFEVKVGVYN  
NKGDPFQSQIVVICSAEGEPSAAPT DVKATSVSVSEILVAKHIKESLGRPQGFVGVYKDM  
EQEDTAETVKTRGNESFVILTGLEGNTLYHFTVFRAYNGAGYGPSSSEVSATTKKSPPSQA  
PSNLREQQGSQVSLGEPVIPLANESEVVGKVFYRQEGHSNSQVIETQKLQAVVPLPDAG  
VYIIEVRAYSEG DGTASSQIRVPSYSGGKITSAQSTLHSLSTSSSSVTLLLALMIPSTS  
>O95057

MPEQSNDRVVFVFGAGGVGKSSLVLRVFKGTFRDTYIPTIEDTYRQVISCDKSVCTLQIT  
DTTGS HQFPAMQRLSISKGHAFILVFSVTSKQSLEELGPIYKLVQIKGSVEDIPVMLVG  
NKCDETQREVDTREAVAQEKCAFMETSAKMNYNVKELFQELLTLETRRNM SLNIDGKR  
SGKQKRTDRVKGKCTLM  
>O95497

MTTQLPAYVAIILLFYVSRASCQDTFTAAYVEHAAILPNATLTPVSREEALALMNRNLDIL  
EGAITSAADQGAHIIVTPEDAIYGNFN RDSLYPLEDIPDPEVNI PCNNRNRFGQTPVQE  
RLSCLAKNNSIYVVANIGDKKPCDTS DPQC PPDGRYQYNTDVVFDSQGLVARYHKQNL F  
MGENQFNVPKEPEIVTFNTTFGSFGIFTCFDILFHDPAVTLVKDFHVDTIVFP TAMNVLP  
HLSAVEFHSAAMGMRVNFLASNIHYP SKKMTGSGIYAPNSSRAFHYDMKTEEGKLLLSQL  
DSHP SHSAVVNTSYASSIEALSSGNKEFKGTVFFDEFTFVKLTGVAGNYTVCQKDL CCHL  
SYKMSENIPNEVYALGAFDGLHTVEGRYYLQICTLLKCKTTNLNTCGDSAETASTRFEMF  
SLSGTFGTQYVFPVLLSENQLAPGEFQVSTDGRLFSLKPTSGPVLTVTLFGRLYEKDAS  
NASSGLTAQARIIMLIVIAPIVCSLS  
>P35414

MEEGGDFDNYYGADNQSECEYTDKSSGALIPAIYMLVFL LGTTGNGLVLT VFRSSREKRR  
SADIFIASLAVADLTFVVTLPLATYTYRDYDPFGTFFCKLSSYLIFVNM YASVFLTGLS  
FDRYLAIVRPVANARLRLRVSGAVATAVLVLAALLAMPVMVLRTTGDLENTTKVQCYMDY  
SMVATVSSEAEVGLGVSSTTVGFVVPFTIMLTCYFFIAQTIAGHFRKERIEGLRKRRL  
SIIIVLVVTFALCMPYHLVKTLYMLGSL LHPCDFDLFLMNI FPYCTCISYVNSCLNPFY  
AFFDPRFRQACTSMLCCGQSRCAGTSHSSSGEKSASYSSGHSQGP GPNMGKGGEQMHEKS  
IPYSQETLVVD  
>P35462

MASLSQLSSHLNYTCGAENSTGASQARPHAYYALSICALILAI VFGNGLVCM AVLKERAL  
QTTTNYLVVSLAVADLLVATLVMPVYLEVTGGVNF SRICCDV FVTLDVMMCTASILNLC  
AISIDRYTAVVMPVHYQHGTGQSSCRRVALMITAVVLAFAVSCPLLFGFNTTGDPTVCSI

SNPDFVIYSSVVSFYLPFGVTVLVYARIYVVLKQRRRKRI LTRQNSQCNSVRPGFPQOTL  
SPDPAHLELKRYYSICQDTALGGPGFQERGGELKREEKTRNSLSPTIAPKLSLEVRKLSN  
GRLSTSLKLGPLQPRGVPLREKKATQMVAVLGFIVCLPFFLTHVLNTHCQTCHVSPEL  
YSATTLGYVNSALNPVIYTTFNIEFRKAFLKILSC

>P36021

MALQSQASEEAKGPQEADQEQQEPVGSPEPESEPEPEPEPEPEPVVPPPEPQPEPQPLPDF  
APLPELEFESERVHEPEPTPTVETRGTARGFQPPEGGFVVFVFAATCNGSIFGIHNSVGI  
LYSMLLEEEKEKNRQVEFQAAVGALAMGMIFFCSPIVSI FTDRLGCRITATAGA AVAFIG  
LHTSSFTSSLSLRYFTY GILFGCGCSFAFQPSLVILGHYFQRR LGLANGVVSAGSSIFSM  
SFPFLIRMLGDKIKLAQTFQVLSTFMFVLM LLSLTYRPLLSSQDTPSKRGVRTLHQRF L  
AQLRKYFNMRVFRQRTYRIAFGIAAAALGYFVPYVHLMKYVEEEFSEIKETVLLVCIGAT  
SGLGRLVSGHISDSIPGLKKIYLQVLSFLLLGLMSMMIPLCRDFGGLIVVCLF LGLCDGF  
FITIMAPIAFELVGP MQASQAIGYLLGMMALPMIAGPPIAGLLRNCFGDYHVAFYFAGVP  
PIIGAVILFFVPLMHQRMFKKEQRDSSKDKMLAPDPDPNGELLPGSPNPEEPI

>P36382

MGDSFLGNFLEEVHKKHSTVVGKVLTVLFI FRMLVLGTAAESSGDEQADFRCDTIQPGCQN  
VCYDQAFPI SHIRYVLQII FVSTPSLVYMGHAMHTV RMQEKRLREAERAKEVRGSGSYE  
YPVAEKAELSCEEGNGRIALQGTLLNTYVCSILIRTTMEVGFIVGQYFIYGI FLTTLHVC  
RRSPCPHPVNCYVSRPTEKNVFIVFMLAVAALSLLL SLAELYHLGKKIRQRFVKPRQHMA  
KCQLSGPSVGI VQSC TPPPDFNQCLENGPGGKFFNPF SNNMASQQNTDNLVTEQVRGQEQ  
TPGEGFIQVRYGQKPEVPNGVSPGHRLPHGYHSDKRRLSKASSKARSDDL SV

>P36383

MSSFLTRLLEEIHNHSTFVGKILTVLIVFRIVLTA VGGESIYYDEQSKFVCNTEQPGCEN  
VCYDAFAPLSHVRVFVQI IILVATPSV MYLGYAIHKIAKMEHGEADKKAARSKPYAMRKQH  
RALEETEEDNEEDPMMYPEMELES DKENKEQSQPKPKHDGRRRIREDGLMKIYVLQLLAR  
TVFEVGF LIGQYFLYGFVHPFYVCSRLPCPHKIDCFISR PTEKTIFLLIMYGVTGLCLL  
LNIEMHLH LGFTIRDSLNSKRRELEDPGAYNYPFTNTPSAPP GYNI AVKPDQIQYTELSN  
AKIAYKQNKANTAQEQQYGSHEENLPADLEALQREIRMAQERLDLAVQAYSHQNNPHGPR  
EKKAKVGSKAGSNKSTASSKSGDGKTSVI

>P37288

MRLSAGPDAGPSGNSSPPLATGAGNTSREAEALGEGNGPPRDVRNEELAKLEIAVLAVTF  
AVAVLGNSSVLLALHRTPRKTSRMHLFIRHLSLADLAVAFFQVLPQMCDITYRFRGPDLC  
RVVKHLQVFGMFASAYMLVVM TADRYIAVCHPLKTLQQPARRSRLMIAAAVLSFVLSTPQ  
YFVFSMIEVNNVTKARDCATFIQPGSRAYVTMTGGIFVAPVVILGT CYGFICYNICNVRG  
KTASRQSKGAEQAGVAFQKGFLLAPCVSSVKSISR AKIRTVKMTFVIVTAYIVCAPFFII  
QMSVDPMSVTESENPTITITALLGSLNSCCNPIY MFFSGHLLQDCVQSFPCQNMKEKFN  
KEDTDSMSRRQTFYSNNRSPTNSTGMKDSPKSSKSIKFI PVST
