# Supplementary material for: iLoc-Hum: using the accumulation-label scale to predict subcellular locations of human proteins with both single and multiple sites
Source: Royal Society of Chemistry journal article supplement (doi:10.1039/c1mb05420a), 2011-12-01
Supplement: c1mb05420a_6.pdf [file c1mb05420a_6.pdf]

**Online Supporting Information S3b.** A head-to-head comparison between the results predicted by **iLoc-Hum** and those by **Wolf PSORT** (Horton, et al. Nucleic Acids Res 35, W585-587) on the 300 independent single-location proteins in the [Online Supporting Information S3a](#). For facilitating comparison, the corresponding experimental subcellular locations as annotated in Swiss-Prot databank (Release 2011\_06 of 31-May-11) are also given.

| Protein accession number | <b>iLoc-Hum</b> | <b>Wolf PSORT</b>     | Experimental result annotated in Swiss-Prot database |
|--------------------------|-----------------|-----------------------|------------------------------------------------------|
| O15530                   | Cytoplasmic     | Mitochondrion         | Cytoplasmic                                          |
| O60271                   | Cytoplasmic     | Endoplasmic reticulum | Cytoplasmic                                          |
| O94806                   | Cytoplasmic     | Mitochondrion         | Cytoplasmic                                          |
| O94827                   | Cytoplasmic     | Nuclear               | Cytoplasmic                                          |
| O95208                   | Cytoplasmic     | Nuclear               | Cytoplasmic                                          |
| P06753                   | Cytoplasmic     | Cytoplasmic           | Cytoplasmic                                          |
| P07437                   | Cytoplasmic     | Cytoplasmic           | Cytoplasmic                                          |
| P07947                   | Cytoplasmic     | Cytoplasmic           | Cytoplasmic                                          |
| P08107                   | Cytoplasmic     | Cytoplasmic           | Cytoplasmic                                          |
| P08238                   | Cytoplasmic     | Cytoplasmic           | Cytoplasmic                                          |
| P08631                   | Cytoplasmic     | Cytoplasmic           | Cytoplasmic                                          |
| P09210                   | Cytoplasmic     | Cytoplasmic           | Cytoplasmic                                          |
| P0CG30                   | Cytoplasmic     | Mitochondrion         | Cytoplasmic                                          |
| P11142                   | Cytoplasmic     | Cytoplasmic           | Cytoplasmic                                          |
| P11802                   | Cytoplasmic     | Cytoplasmic           | Cytoplasmic                                          |
| P46439                   | Cytoplasmic     | Cytoplasmic           | Cytoplasmic                                          |
| P48594                   | Cytoplasmic     | Cytoplasmic           | Cytoplasmic                                          |
| P50224                   | Cytoplasmic     | Cytoplasmic           | Cytoplasmic                                          |
| P50226                   | Cytoplasmic     | Cytoplasmic           | Cytoplasmic                                          |
| P57078                   | Cytoplasmic     | Nuclear               | Cytoplasmic                                          |
| P60709                   | Cytoplasmic     | Cytoskeleton          | Cytoplasmic                                          |
| Q13464                   | Cytoplasmic     | Nuclear               | Cytoplasmic                                          |
| Q15642                   | Cytoplasmic     | Nuclear               | Cytoplasmic                                          |
| Q6ZTW0                   | Cytoplasmic     | Peroxisomal           | Cytoplasmic                                          |

|        |                            |                          |              |
|--------|----------------------------|--------------------------|--------------|
| Q8CJ53 | Cytoplasmic                | Nuclear                  | Cytoplasmic  |
| Q8N264 | Cytoplasmic                | Nuclear                  | Cytoplasmic  |
| Q96DB5 | Cytoskeleton               | Mitochondrion            | Cytoplasmic  |
| Q96K30 | Cytoplasmic                | Nuclear                  | Cytoplasmic  |
| Q96KG9 | Cytoplasmic                | Nuclear                  | Cytoplasmic  |
| Q9BQ89 | Centrosome                 | Mitochondrion            | Cytoplasmic  |
| Q08014 | Cytoskeleton               | Cytoplasmic              | Cytoskeleton |
| P20305 | Cytoskeleton               | Extracellular            | Cytoskeleton |
| P13020 | Cytoskeleton               | Endoplasmic<br>reticulum | Cytoskeleton |
| O61270 | Cytoskeleton               | Cytoplasmic              | Cytoskeleton |
| Q27319 | Cytoskeleton               | Cytoplasmic              | Cytoskeleton |
| Q28372 | Cytoskeleton               | Nuclear                  | Cytoskeleton |
| Q76LL6 | Cytoplasm;<br>Cytoskeleton | Nuclear                  | Cytoskeleton |
| Q9JJV2 | Cytoplasm;<br>Cytoskeleton | Extracellular            | Cytoskeleton |
| Q09430 | Cytoplasm;<br>Cytoskeleton | Extracellular            | Cytoskeleton |
| P62963 | Cytoplasm;<br>Cytoskeleton | Cytoplasmic              | Cytoskeleton |
| Q26768 | Cytoskeleton               | Nuclear                  | Cytoskeleton |
| O13728 | Cytoskeleton               | Mitochondrion            | Cytoskeleton |
| Q94053 | Cytoskeleton               | Cytoplasmic              | Cytoskeleton |
| Q9TVW5 | Cytoskeleton               | Cytoplasmic              | Cytoskeleton |
| Q21244 | Cytoskeleton               | Cytoplasmic              | Cytoskeleton |
| Q17856 | Cytoskeleton               | Cytoplasmic              | Cytoskeleton |
| Q18461 | Cytoskeleton               | Cytoplasmic              | Cytoskeleton |
| Q19832 | Cytoskeleton               | Cytoplasmic              | Cytoskeleton |
| P53020 | Cytoskeleton               | Cytoplasmic              | Cytoskeleton |
| P53019 | Cytoskeleton               | Cytoplasmic              | Cytoskeleton |
| P53018 | Cytoskeleton               | Cytoplasmic              | Cytoskeleton |
| P13263 | Cytoskeleton               | Cytoplasmic              | Cytoskeleton |
| P27440 | Cytoskeleton               | Cytoplasmic              | Cytoskeleton |
| P13262 | Cytoskeleton               | Cytoplasmic              | Cytoskeleton |
| P27439 | Cytoskeleton               | Cytoplasmic              | Cytoskeleton |

|        |                       |                 |                       |
|--------|-----------------------|-----------------|-----------------------|
| P53017 | Cytoskeleton          | Cytoplasmic     | Cytoskeleton          |
| P05634 | Cytoskeleton          | Cytoplasmic     | Cytoskeleton          |
| Q23519 | Cytoskeleton          | Cytoplasmic     | Cytoskeleton          |
| Q6AYD6 | Cytoplasm             | Nuclear         | Cytoskeleton          |
| Q8R1G6 | Cytoplasm             | Nuclear         | Cytoskeleton          |
| O08601 | Endoplasmic reticulum | Extracellular   | Endoplasmic reticulum |
| O11982 | Cytoplasmic           | Cytoplasmic     | Endoplasmic reticulum |
| O12674 | Cytoplasmic           | Cytoplasmic     | Endoplasmic reticulum |
| O35949 | Endoplasmic reticulum | Plasma membrane | Endoplasmic reticulum |
| O42707 | Endoplasmic reticulum | Peroxisomal     | Endoplasmic reticulum |
| O54998 | Endoplasmic reticulum | Extracellular   | Endoplasmic reticulum |
| O56850 | Cytoplasmic           | Cytoplasmic     | Endoplasmic reticulum |
| O59833 | Endoplasmic reticulum | Plasma membrane | Endoplasmic reticulum |
| O60568 | Endoplasmic reticulum | Extracellular   | Endoplasmic reticulum |
| O77588 | Endoplasmic reticulum | Extracellular   | Endoplasmic reticulum |
| O92374 | Cytoplasmic           | Cytoplasmic     | Endoplasmic reticulum |
| O94401 | Endoplasmic reticulum | Plasma membrane | Endoplasmic reticulum |
| O94491 | Endoplasmic reticulum | Plasma membrane | Endoplasmic reticulum |
| P07308 | Endoplasmic reticulum | Plasma membrane | Endoplasmic reticulum |
| P12244 | Endoplasmic reticulum | Mitochondrion   | Endoplasmic reticulum |
| P12337 | Endoplasmic reticulum | Extracellular   | Endoplasmic reticulum |
| P13011 | Endoplasmic reticulum | Cytoplasmic     | Endoplasmic reticulum |
| P13516 | Endoplasmic reticulum | Plasma membrane | Endoplasmic reticulum |
| P16232 | Endoplasmic           | Extracellular   | Endoplasmic           |

|        |                       |                       |                       |
|--------|-----------------------|-----------------------|-----------------------|
|        | reticulum             |                       | reticulum             |
| P19324 | Endoplasmic reticulum | Extracellular         | Endoplasmic reticulum |
| P81999 | Endoplasmic reticulum | Extracellular         | Endoplasmic reticulum |
| Q29550 | Endoplasmic reticulum | Endoplasmic reticulum | Endoplasmic reticulum |
| Q64176 | Endoplasmic reticulum | Endoplasmic reticulum | Endoplasmic reticulum |
| Q64573 | Endoplasmic reticulum | Endoplasmic reticulum | Endoplasmic reticulum |
| Q6AYY8 | Endoplasmic reticulum | Plasma membrane       | Endoplasmic reticulum |
| Q6P7B9 | Endoplasmic reticulum | Plasma membrane       | Endoplasmic reticulum |
| Q6QLL4 | Endoplasmic reticulum | Peroxisomal           | Endoplasmic reticulum |
| Q99KV1 | Endoplasmic reticulum | Extracellular         | Endoplasmic reticulum |
| Q9D1Q6 | Endoplasmic reticulum | Extracellular         | Endoplasmic reticulum |
| Q9TT94 | Endoplasmic reticulum | Plasma membrane       | Endoplasmic reticulum |
| A1EC31 | Cytoplasmic           | Endoplasmic reticulum | Extracellular         |
| A2AJ76 | Cytoplasmic           | Plasma membrane       | Extracellular         |
| A2ASQ1 | Cytoplasmic           | Extracellular         | Extracellular         |
| E5KIB6 | Cytoplasmic           | Extracellular         | Extracellular         |
| O00468 | Cytoplasmic           | Extracellular         | Extracellular         |
| O00755 | Extracellular         | Mitochondrion         | Extracellular         |
| O09118 | Cytoplasmic           | Extracellular         | Extracellular         |
| O46378 | Extracellular         | Nuclear               | Extracellular         |
| O54767 | Extracellular         | Peroxisomal           | Extracellular         |
| O55189 | Extracellular         | Extracellular         | Extracellular         |
| O55196 | Extracellular         | Extracellular         | Extracellular         |
| O55225 | Extracellular         | Extracellular         | Extracellular         |
| O62702 | Extracellular         | Extracellular         | Extracellular         |
| O70283 | Extracellular         | Plasma membrane       | Extracellular         |
| O76536 | Extracellular         | Mitochondrion         | Extracellular         |

|        |                 |                       |                 |
|--------|-----------------|-----------------------|-----------------|
| O96530 | Extracellular   | Cytoskeleton          | Extracellular   |
| O97647 | Extracellular   | Nuclear               | Extracellular   |
| O97939 | Extracellular   | Extracellular         | Extracellular   |
| P00451 | Extracellular   | Extracellular         | Extracellular   |
| P00730 | Extracellular   | Extracellular         | Extracellular   |
| P00734 | Extracellular   | Extracellular         | Extracellular   |
| P00735 | Extracellular   | Extracellular         | Extracellular   |
| P00750 | Extracellular   | Extracellular         | Extracellular   |
| P00760 | Extracellular   | Extracellular         | Extracellular   |
| P00762 | Extracellular   | Extracellular         | Extracellular   |
| P00763 | Extracellular   | Extracellular         | Extracellular   |
| P00764 | Extracellular   | Extracellular         | Extracellular   |
| P00765 | Extracellular   | Cytoplasmic           | Extracellular   |
| P00768 | Extracellular   | Cytoplasmic           | Extracellular   |
| P00769 | Extracellular   | Cytoplasmic           | Extracellular   |
| A0AAS4 | Golgi apparatus | Plasma membrane       | Golgi apparatus |
| A0M8S7 | Cytoplasmic     | Cytoplasmic           | Golgi apparatus |
| A1C8D8 | Cytoplasmic     | Plasma membrane       | Golgi apparatus |
| A1DAY6 | Cytoplasmic     | Plasma membrane       | Golgi apparatus |
| A1IGX5 | Golgi apparatus | Extracellular         | Golgi apparatus |
| A1L2S8 | Cytoplasmic     | Nuclear               | Golgi apparatus |
| A1X149 | Cytoplasmic     | Cytoplasmic           | Golgi apparatus |
| A1YGR5 | Cytoplasmic     | Endoplasmic reticulum | Golgi apparatus |
| A1YGR6 | Cytoplasmic     | Extracellular         | Golgi apparatus |
| A2QHH4 | Cytoplasmic     | Plasma membrane       | Golgi apparatus |
| A2RUV4 | Cytoplasmic     | Nuclear               | Golgi apparatus |
| A2VDR8 | Golgi apparatus | Cytoplasmic           | Golgi apparatus |
| A2YCI3 | Golgi apparatus | Plasma membrane       | Golgi apparatus |
| A2YHR9 | Golgi apparatus | Plasma membrane       | Golgi apparatus |
| A2YU42 | Golgi apparatus | Plasma membrane       | Golgi apparatus |
| A2ZAK8 | Golgi apparatus | Plasma membrane       | Golgi apparatus |
| A4K2N5 | Golgi apparatus | Plasma membrane       | Golgi apparatus |
| A4K2W1 | Golgi apparatus | Plasma membrane       | Golgi apparatus |

|        |                                                         |                 |                 |
|--------|---------------------------------------------------------|-----------------|-----------------|
| A5PJ65 | Golgi apparatus                                         | Plasma membrane | Golgi apparatus |
| A6ZS37 | Golgi apparatus                                         | Cytoplasmic     | Golgi apparatus |
| A6ZZS6 | Golgi apparatus                                         | Plasma membrane | Golgi apparatus |
| A8XP14 | Golgi apparatus                                         | Peroxisomal     | Golgi apparatus |
| A8Y236 | Cytoplasmic                                             | Golgi apparatus | Golgi apparatus |
| B0F9L4 | Golgi apparatus                                         | Cytoplasmic     | Golgi apparatus |
| P35670 | Endoplasmic reticulum; Golgi apparatus; Plasma membrane | Plasma membrane | Golgi apparatus |
| P61106 | Golgi apparatus                                         | Cytoplasmic     | Golgi apparatus |
| P61204 | Golgi apparatus; Lysosomal                              | Cytoplasmic     | Golgi apparatus |
| P62330 | Golgi apparatus; Lysosomal                              | Cytoplasmic     | Golgi apparatus |
| P84077 | Golgi apparatus; Lysosomal                              | Cytoplasmic     | Golgi apparatus |
| P84085 | Golgi apparatus; Lysosomal                              | Mitochondrion   | Golgi apparatus |
| A5PF10 | Lysosomal                                               | Plasma membrane | Lysosomal       |
| A6BMK7 | Lysosomal                                               | Nuclear         | Lysosomal       |
| A7MB63 | Lysosomal                                               | Plasma membrane | Lysosomal       |
| B1H1P9 | Lysosomal                                               | Plasma membrane | Lysosomal       |
| B5FYY5 | Lysosomal                                               | Mitochondrion   | Lysosomal       |
| B5X7X4 | Lysosomal                                               | Mitochondrion   | Lysosomal       |
| O00906 | Lysosomal                                               | Extracellular   | Lysosomal       |
| O02467 | Lysosomal                                               | Cytoplasmic     | Lysosomal       |
| O18835 | Lysosomal                                               | Extracellular   | Lysosomal       |
| O19015 | Lysosomal                                               | Extracellular   | Lysosomal       |
| O35604 | Lysosomal                                               | Plasma membrane | Lysosomal       |
| O35657 | Lysosomal                                               | Extracellular   | Lysosomal       |
| O46427 | Lysosomal                                               | Extracellular   | Lysosomal       |
| O60931 | Lysosomal                                               | Plasma membrane | Lysosomal       |
| O75503 | Lysosomal                                               | Cytoplasmic     | Lysosomal       |
| O76856 | Lysosomal                                               | Extracellular   | Lysosomal       |
| O77695 | Lysosomal                                               | Plasma membrane | Lysosomal       |

|        |               |                          |               |
|--------|---------------|--------------------------|---------------|
| O89023 | Lysosomal     | Extracellular            | Lysosomal     |
| O97524 | Lysosomal     | Extracellular            | Lysosomal     |
| P00786 | Lysosomal     | Extracellular            | Lysosomal     |
| P00787 | Lysosomal     | Extracellular            | Lysosomal     |
| P00795 | Lysosomal     | Cytoskeleton             | Lysosomal     |
| P04988 | Lysosomal     | Extracellular            | Lysosomal     |
| P04989 | Lysosomal     | Extracellular            | Lysosomal     |
| P06760 | Lysosomal     | Extracellular            | Lysosomal     |
| P07154 | Lysosomal     | Extracellular            | Lysosomal     |
| P07602 | Lysosomal     | Plasma membrane          | Lysosomal     |
| P07688 | Lysosomal     | Extracellular            | Lysosomal     |
| P09648 | Lysosomal     | Extracellular            | Lysosomal     |
| P11456 | Lysosomal     | Extracellular            | Lysosomal     |
| O15528 | Mitochondrion | Mitochondrion            | Mitochondrion |
| O43772 | Mitochondrion | Plasma membrane          | Mitochondrion |
| O75027 | Mitochondrion | Plasma membrane          | Mitochondrion |
| O75324 | Mitochondrion | Extracellular            | Mitochondrion |
| O75616 | Mitochondrion | Mitochondrion            | Mitochondrion |
| O94826 | Mitochondrion | Endoplasmic<br>reticulum | Mitochondrion |
| O95258 | Mitochondrion | Plasma membrane          | Mitochondrion |
| O95674 | Mitochondrion | Plasma membrane          | Mitochondrion |
| P00156 | Mitochondrion | Plasma membrane          | Mitochondrion |
| P00414 | Mitochondrion | Plasma membrane          | Mitochondrion |
| P0C869 | Mitochondrion | Mitochondrion            | Mitochondrion |
| P10176 | Mitochondrion | Mitochondrion            | Mitochondrion |
| P19099 | Mitochondrion | Mitochondrion            | Mitochondrion |
| P22557 | Mitochondrion | Extracellular            | Mitochondrion |
| P23368 | Mitochondrion | Mitochondrion            | Mitochondrion |
| P25874 | Mitochondrion | Cytoplasmic              | Mitochondrion |
| P27144 | Mitochondrion | Mitochondrion            | Mitochondrion |
| P27338 | Mitochondrion | Cytoplasmic              | Mitochondrion |
| P29803 | Mitochondrion | Mitochondrion            | Mitochondrion |
| P36404 | Mitochondrion | Cytoplasmic              | Mitochondrion |

|        |               |                 |               |
|--------|---------------|-----------------|---------------|
| P40305 | Mitochondrion | Plasma membrane | Mitochondrion |
| P49419 | Mitochondrion | Mitochondrion   | Mitochondrion |
| P49448 | Mitochondrion | Mitochondrion   | Mitochondrion |
| P49675 | Mitochondrion | Mitochondrion   | Mitochondrion |
| P50336 | Mitochondrion | Extracellular   | Mitochondrion |
| P55851 | Mitochondrion | Mitochondrion   | Mitochondrion |
| P55916 | Mitochondrion | Cytoplasmic     | Mitochondrion |
| P60602 | Mitochondrion | Extracellular   | Mitochondrion |
| P62072 | Mitochondrion | Extracellular   | Mitochondrion |
| Q00796 | Mitochondrion | Cytoplasmic     | Mitochondrion |
| O14802 | Nuclear       | Cytoplasmic     | Nuclear       |
| O15016 | Nuclear       | Nuclear         | Nuclear       |
| O15047 | Nuclear       | Nuclear         | Nuclear       |
| O15084 | Nuclear       | Nuclear         | Nuclear       |
| O15151 | Nuclear       | Nuclear         | Nuclear       |
| O15156 | Nuclear       | Nuclear         | Nuclear       |
| O15178 | Nuclear       | Nuclear         | Nuclear       |
| O15265 | Nuclear       | Nuclear         | Nuclear       |
| O15350 | Nuclear       | Nuclear         | Nuclear       |
| O15353 | Nuclear       | Nuclear         | Nuclear       |
| O15504 | Nuclear       | Nuclear         | Nuclear       |
| O43189 | Nuclear       | Nuclear         | Nuclear       |
| O43248 | Nuclear       | Nuclear         | Nuclear       |
| O43316 | Nuclear       | Nuclear         | Nuclear       |
| O43543 | Nuclear       | Cytoplasmic     | Nuclear       |
| O43680 | Nuclear       | Nuclear         | Nuclear       |
| O43683 | Nuclear       | Nuclear         | Nuclear       |
| O43829 | Nuclear       | Nuclear         | Nuclear       |
| O60231 | Nuclear       | Nuclear         | Nuclear       |
| P0CG13 | Nuclear       | Cytoplasmic     | Nuclear       |
| P39687 | Nuclear       | Cytoplasmic     | Nuclear       |
| P52655 | Nuclear       | Cytoplasmic     | Nuclear       |
| P52945 | Nuclear       | Extracellular   | Nuclear       |



|        |             |                 |             |
|--------|-------------|-----------------|-------------|
| P53350 | Nuclear     | Cytoplasmic     | Nuclear     |
| P54725 | Nuclear     | Mitochondrion   | Nuclear     |
| P55769 | Nuclear     | Cytoplasmic     | Nuclear     |
| Q4JDL3 | Nuclear     | Cytoplasmic     | Nuclear     |
| Q7Z7K6 | Nuclear     | Mitochondrion   | Nuclear     |
| Q9UI95 | Nuclear     | Extracellular   | Nuclear     |
| Q9UMS4 | Cytoplasmic | Cytoplasmic     | Nuclear     |
| A5PJL1 | Peroxisomal | Mitochondrion   | Peroxisomal |
| A6H7C2 | Peroxisomal | Peroxisomal     | Peroxisomal |
| B3DMA2 | Peroxisomal | Nuclear         | Peroxisomal |
| O00116 | Peroxisomal | Cytoplasmic     | Peroxisomal |
| O14136 | Peroxisomal | Cytoplasmic     | Peroxisomal |
| O14832 | Peroxisomal | Mitochondrion   | Peroxisomal |
| O18778 | Peroxisomal | Mitochondrion   | Peroxisomal |
| O35078 | Peroxisomal | Extracellular   | Peroxisomal |
| O35386 | Peroxisomal | Mitochondrion   | Peroxisomal |
| O49506 | Peroxisomal | Cytoplasmic     | Peroxisomal |
| O59807 | Peroxisomal | Cytoplasmic     | Peroxisomal |
| O60065 | Peroxisomal | Cytoplasmic     | Peroxisomal |
| O70597 | Peroxisomal | Mitochondrion   | Peroxisomal |
| O74934 | Peroxisomal | Cytoplasmic     | Peroxisomal |
| O74936 | Peroxisomal | Cytoplasmic     | Peroxisomal |
| O75192 | Peroxisomal | Mitochondrion   | Peroxisomal |
| O80845 | Peroxisomal | Cytoplasmic     | Peroxisomal |
| O89016 | Peroxisomal | Plasma membrane | Peroxisomal |
| O94227 | Peroxisomal | Extracellular   | Peroxisomal |
| O94516 | Peroxisomal | Nuclear         | Peroxisomal |
| O96011 | Peroxisomal | Cytoplasmic     | Peroxisomal |
| P00371 | Peroxisomal | Extracellular   | Peroxisomal |
| P07872 | Peroxisomal | Cytoplasmic     | Peroxisomal |
| P09110 | Peroxisomal | Mitochondrion   | Peroxisomal |
| P09118 | Peroxisomal | Cytoplasmic     | Peroxisomal |
| P14293 | Peroxisomal | Cytoplasmic     | Peroxisomal |

|        |                             |                          |                 |
|--------|-----------------------------|--------------------------|-----------------|
| P16164 | Peroxisomal                 | Cytoplasmic              | Peroxisomal     |
| Q8BGI5 | Peroxisomal                 | Peroxisomal              | Peroxisomal     |
| Q9JJK3 | Peroxisomal                 | Peroxisomal              | Peroxisomal     |
| Q9JJK4 | Peroxisomal                 | Peroxisomal              | Peroxisomal     |
| A0FGR8 | Plasma membrane             | Nuclear                  | Plasma membrane |
| A0FGR9 | Plasma membrane             | Cytoplasmic              | Plasma membrane |
| A4D1S5 | Plasma membrane             | Cytoplasmic              | Plasma membrane |
| A6NJW9 | Plasma membrane             | Mitochondrion            | Plasma membrane |
| A6NKC4 | Plasma membrane             | Extracellular            | Plasma membrane |
| A6NLE4 | Plasma membrane             | Extracellular            | Plasma membrane |
| A8K4G0 | Plasma membrane             | Extracellular            | Plasma membrane |
| A8MPY1 | Plasma membrane;<br>Synapse | Plasma membrane          | Plasma membrane |
| O00212 | Plasma membrane             | Extracellular            | Plasma membrane |
| O00451 | Plasma membrane             | Extracellular            | Plasma membrane |
| O00526 | Plasma membrane             | Extracellular            | Plasma membrane |
| O14610 | Plasma membrane             | Cytoplasmic              | Plasma membrane |
| O14786 | Plasma membrane             | Endoplasmic<br>reticulum | Plasma membrane |
| O14798 | Plasma membrane             | Extracellular            | Plasma membrane |
| O14910 | Plasma membrane             | Cytoplasmic              | Plasma membrane |
| O15165 | Plasma membrane             | Cytoplasmic              | Plasma membrane |
| O43300 | Plasma membrane             | Peroxisomal              | Plasma membrane |
| O60235 | Plasma membrane             | Extracellular            | Plasma membrane |
| O60262 | Plasma membrane             | Cytoplasmic              | Plasma membrane |
| O76036 | Plasma membrane             | Extracellular            | Plasma membrane |
| O94772 | Plasma membrane             | Extracellular            | Plasma membrane |
| O94779 | Plasma membrane             | Extracellular            | Plasma membrane |
| O95057 | Plasma membrane             | Cytoplasmic              | Plasma membrane |
| O95497 | Plasma membrane             | Extracellular            | Plasma membrane |
| P35414 | Plasma membrane             | Plasma membrane          | Plasma membrane |
| P35462 | Plasma membrane             | Plasma membrane          | Plasma membrane |
| P36021 | Plasma membrane             | Plasma membrane          | Plasma membrane |
| P36382 | Plasma membrane             | Plasma membrane          | Plasma membrane |

|        |                 |                 |                 |
|--------|-----------------|-----------------|-----------------|
| P36383 | Plasma membrane | Plasma membrane | Plasma membrane |
| P37288 | Plasma membrane | Plasma membrane | Plasma membrane |

---
