# Supplementary material for: iLoc-Hum: using the accumulation-label scale to predict subcellular locations of human proteins with both single and multiple sites
Source: Royal Society of Chemistry journal article supplement (doi:10.1039/c1mb05420a), 2011-12-01
Supplement: c1mb05420a_8.pdf [file c1mb05420a_8.pdf]

**Online Supporting Information S3d.** A demonstration to show the power of **iLoc-Hum** in identifying the multiple locations of proteins via a head-to-head comparison between the results predicted by **iLoc-Hum** and those by **Wolf PSORT** (Horton, et al. *Nucleic Acids Res* 35, W585-587) on the 30 multiple-location proteins in the [Online Supporting Information S3c](#). For facilitating comparison, the corresponding experimental subcellular locations as annotated in Swiss-Prot databank (Release 2011\_06 of 31-May-11) are also given. As shown from the results below, of the 30 proteins, 26 were perfectly predicted by **iLoc-Hum** for their multiple-location sites without any false positive and false negative, while 4 were partially correctly predicted. This kind of capacity of **iLoc-Hum** in dealing with multiple-location proteins is beyond the reach of **Wolf PSORT**.

| Protein accession number | <b>iLoc-Hum</b>                        | <b>Wolf PSORT</b> | Experimental result annotated in Swiss-Prot database |
|--------------------------|----------------------------------------|-------------------|------------------------------------------------------|
| A0FI79                   | Cytoplasmic; Golgi apparatus           | Nuclear           | Cytoplasmic; Golgi apparatus                         |
| A0JPI4                   | Cytoplasmic; Golgi apparatus           | Nuclear           | Cytoplasmic; Golgi apparatus                         |
| A6R3V7                   | Endoplasmic reticulum; Golgi apparatus | Plasma membrane   | Cytoplasmic; Endoplasmic reticulum; Golgi apparatus; |
| A7YY49                   | Endoplasmic reticulum; Golgi apparatus | Plasma membrane   | Endoplasmic reticulum; Golgi apparatus               |
| B0XYF0                   | Cytoplasmic; Golgi apparatus           | Plasma membrane   | Cytoplasmic; Golgi apparatus; Endoplasmic reticulum  |
| B2WDD8                   | Cytoplasmic; Golgi apparatus;          | Plasma membrane   | Cytoplasmic; Golgi apparatus; Endoplasmic reticulum  |
| O00628                   | Cytoplasmic; Peroxisomal               | Cytoplasmic       | Cytoplasmic; Peroxisomal                             |
| O08547                   | Endoplasmic reticulum; Golgi apparatus | Cytoplasmic       | Endoplasmic reticulum; Golgi apparatus               |
| O08595                   | Endoplasmic reticulum; Golgi apparatus | Cytoplasmic       | Endoplasmic reticulum; Golgi apparatus               |
| O09174                   | Mitochondrion; Peroxisomal             | Cytoplasmic       | Mitochondrion; Peroxisomal                           |
| O13825                   | Endoplasmic reticulum; Golgi apparatus | Extracellular     | Endoplasmic reticulum; Golgi apparatus               |
| O13932                   | Endoplasmic reticulum; Golgi apparatus | Cytoplasmic       | Endoplasmic reticulum; Golgi apparatus               |
| O13946                   | Endoplasmic reticulum; Golgi apparatus | Extracellular     | Endoplasmic reticulum; Golgi apparatus               |
| O43933                   | Cytoplasmic; Peroxisomal               | Nuclear           | Cytoplasmic; Peroxisomal                             |
| O74941                   | Cytoplasmic; Peroxisomal               | Mitochondrion     | Cytoplasmic; Peroxisomal                             |
| O75874                   | Cytoplasmic; Peroxisomal               | Cytoplasmic       | Cytoplasmic; Peroxisomal                             |
| P21549                   | Mitochondrion; Peroxisomal             | Cytoplasmic       | Mitochondrion; Peroxisomal                           |

|        |                            |               |                            |
|--------|----------------------------|---------------|----------------------------|
| P24004 | Cytoplasmic; Peroxisomal   | Cytoplasmic   | Cytoplasmic; Peroxisomal   |
| P34913 | Cytoplasmic; Peroxisomal   | Extracellular | Cytoplasmic; Peroxisomal   |
| P34914 | Cytoplasmic; Peroxisomal   | Extracellular | Cytoplasmic; Peroxisomal   |
| P50542 | Cytoplasmic; Peroxisomal   | Nuclear       | Cytoplasmic; Peroxisomal   |
| P70473 | Mitochondrion; Peroxisomal | Cytoplasmic   | Mitochondrion; Peroxisomal |
| P80299 | Cytoplasmic; Peroxisomal   | Extracellular | Cytoplasmic; Peroxisomal   |
| P84817 | Cytoplasmic; Peroxisomal   | Cytoplasmic   | Cytoplasmic; Peroxisomal   |
| P97865 | Cytoplasmic; Peroxisomal   | Cytoplasmic   | Cytoplasmic; Peroxisomal   |
| Q03426 | Cytoplasmic; Peroxisomal   | Extracellular | Cytoplasmic; Peroxisomal   |
| Q8R537 | Cytoplasmic; Peroxisomal   | Cytoplasmic   | Cytoplasmic; Peroxisomal   |
| Q92820 | Extracellular; Lysosomal   | Extracellular | Extracellular; Lysosomal   |
| Q9CQ92 | Cytoplasmic; Peroxisomal   | Cytoplasmic   | Mitochondrion; Peroxisomal |
| Q9UHK6 | Mitochondrion; Peroxisomal | Mitochondrion | Mitochondrion; Peroxisomal |
